# Supplementary material for: A three-component [3 + 2]-cycloaddition/elimination cascade for the synthesis of spirooxindole-pyrrolizines
Source: Royal Society of Chemistry journal article supplement (doi:10.1039/d0ob02321c), 2020-12-22

# **A Three-Component [3+2]-Cycloaddition/Elimination Cascade for the Synthesis of Spirooxindole-pyrrolizines**

Martina Palomba, Emanuela de Monte, Andrea Mambrini, Luana Bagnoli, Claudi Santi and Francesca Marini\*

Department of Pharmaceutical Sciences (Group of Catalysis, Synthesis and Organic Green Chemistry), University of Perugia, Via del Liceo 1, 06123 Perugia, Italy.

e-mail: francesca.marini@unipg.it

## **Supporting Information**

### **Table of Contents**

|                                                       |    |
|-------------------------------------------------------|----|
| Studies of reaction mechanism                         | S2 |
| <sup>1</sup> H-/ <sup>13</sup> C/NOESY/HETCOR spectra | S6 |

## Studies for reaction mechanism

**Figure 1.**  $^{77}\text{Se}$  spectrum of vinyl selenone **1a** ( $\text{CD}_3\text{CN}$ , 76.27 MHz)

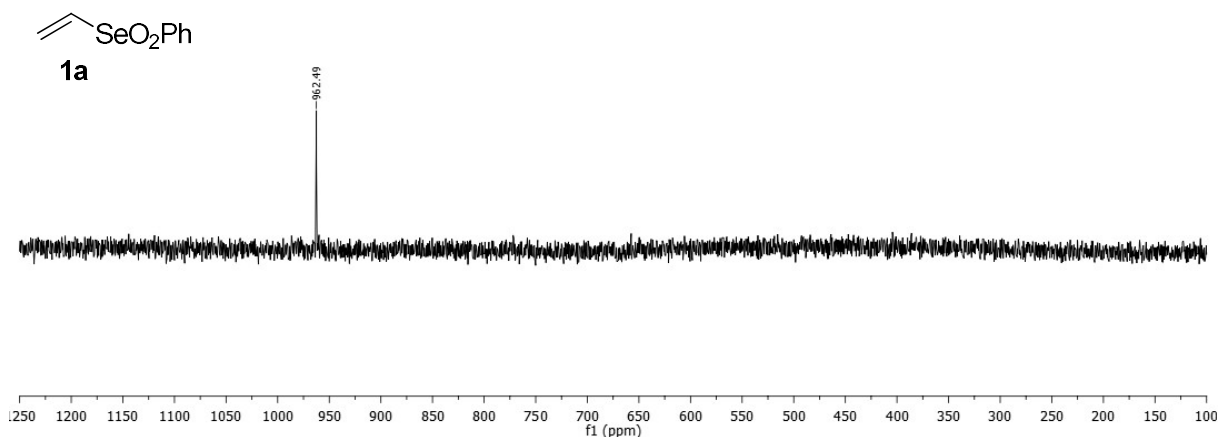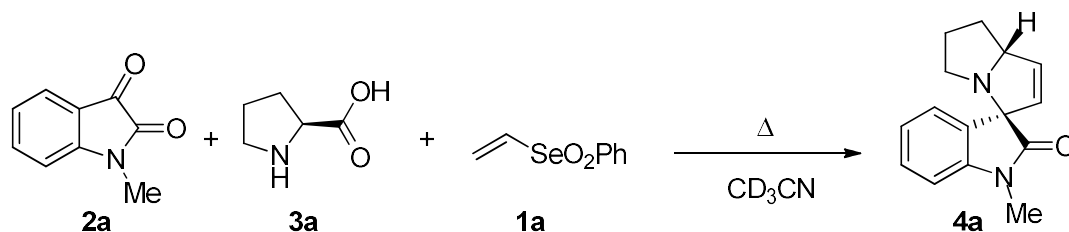

The vinylselenone **1a** (0.10 mmol, 21.6 mg, 1.0 eq.), the *N*-methyl isatin **2a** (0.15 mmol, 24.17 mg, 1.5 eq.) and the *L*-Proline (0.18 mmol, 20.72 mg, 1.8 eq.) were dissolved in 1 ml of  $\text{CD}_3\text{CN}$ . The reaction mixture was vigorously stirred at reflux for 5 minutes. Another experiment was also performed at room temperature for 2 hours.

**Figure 2.**  $^1\text{H}$ -NMR of the reaction mixture after 5 minutes ( $\text{CD}_3\text{CN}$ , 400 MHz)

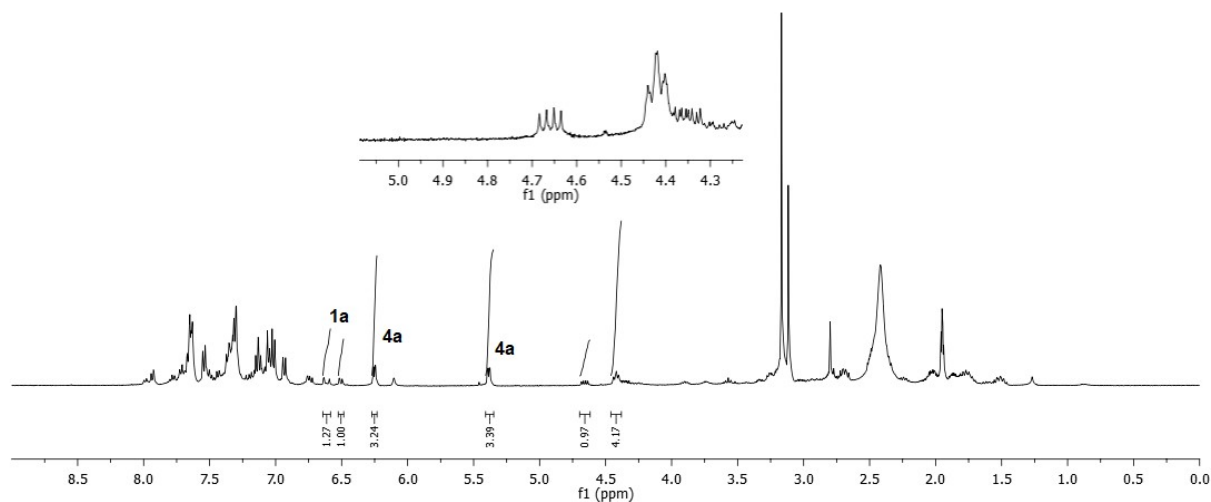

**Figure 3.**  $^{77}\text{Se}$  spectrum of the reaction mixture after 5 minutes ( $\text{CD}_3\text{CN}$ , 76.27 MHz)

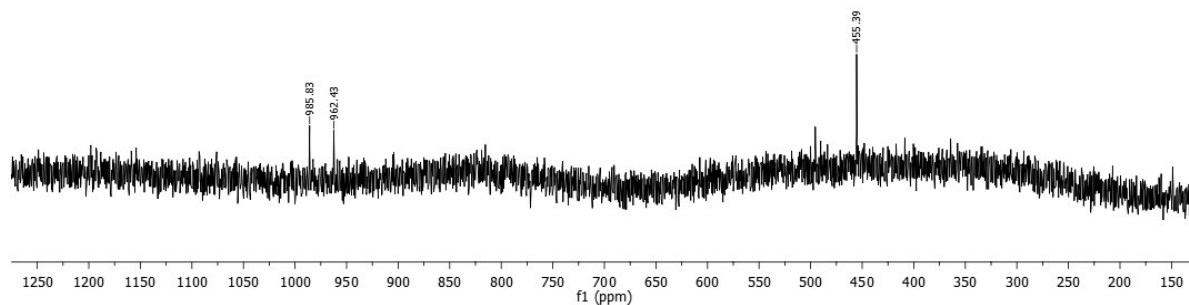

**Figure 4.**  $^1\text{H}$ -NMR of the reaction mixture after 2 hours at room temperature ( $\text{CD}_3\text{CN}$ , 400 MHz)

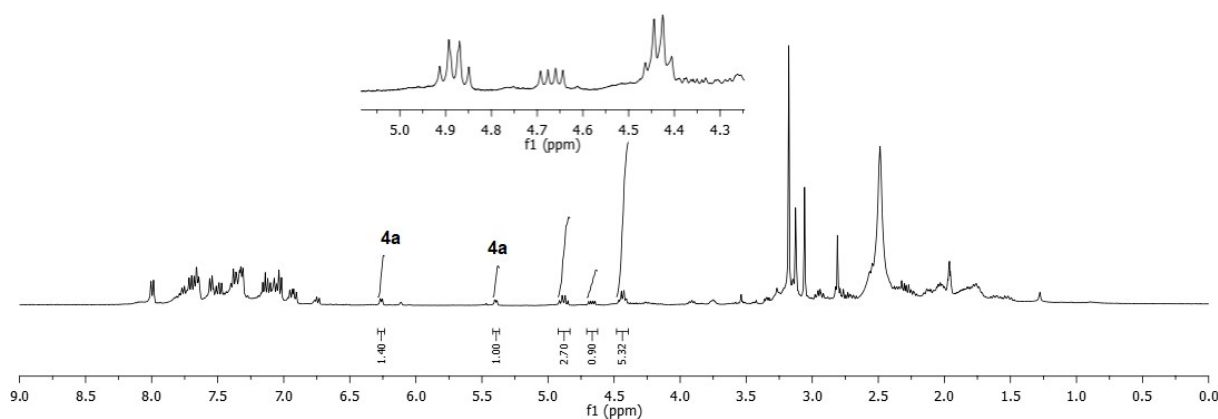

**Figure 5.**  $^{77}\text{Se}$ -NMR spectrum of the reaction mixture 2 hours ( $\text{CD}_3\text{CN}$ , 76.27 MHz)

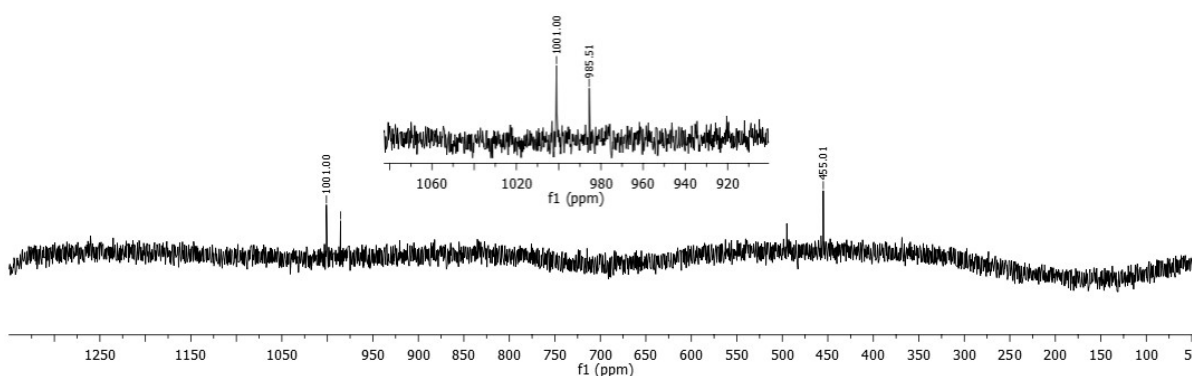

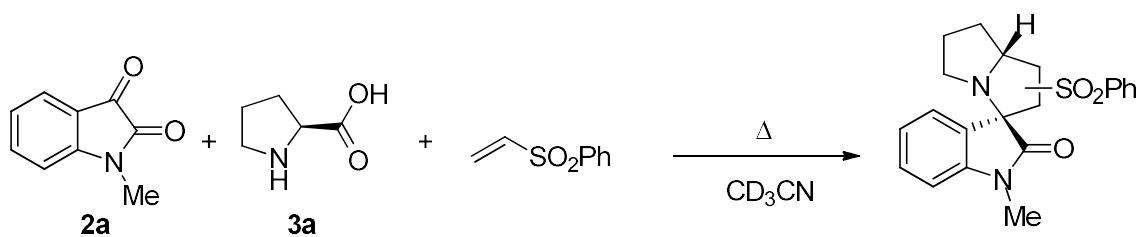

The vinyl sulfone **8** (0.20 mmol, 33.64 mg, 1.0 eq.), the *N*-methyl isatin **2a** (0.30 mmol, 48.34 mg, 1.5 eq.) and the *L*-Proline (0.36 mmol, 41.45 mg, 1.8 eq.) were dissolved in 4 ml of  $\text{CH}_3\text{CN}$ . The reaction mixture was vigorously stirred at reflux for 3 hours. The purification of the complex mixture was attempted by column chromatography using EtOAc/MeOH/ $\text{NH}_4\text{OH}$  aq. Fractions were reported below.

**Figure 6.**

1<sup>st</sup> fraction

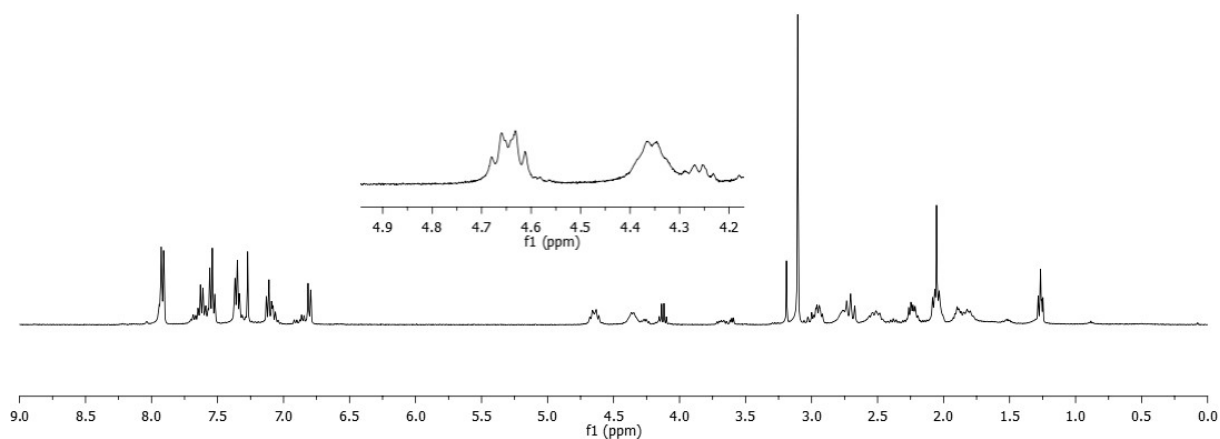

2<sup>nd</sup> fraction

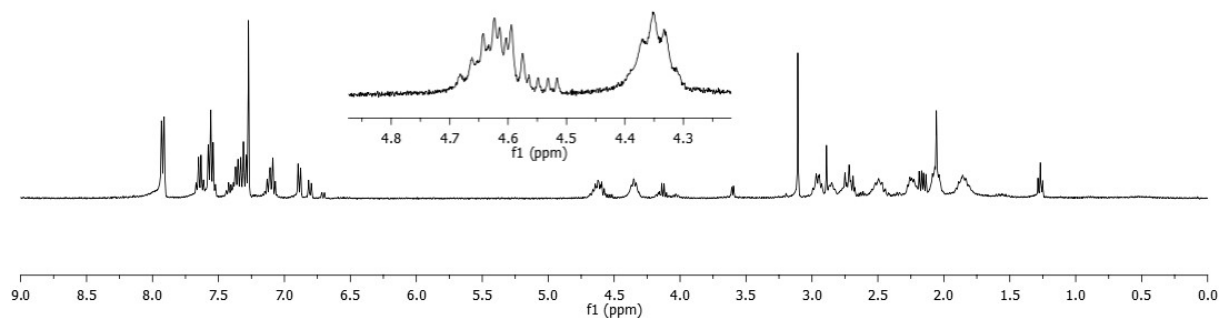

3<sup>rd</sup> fraction

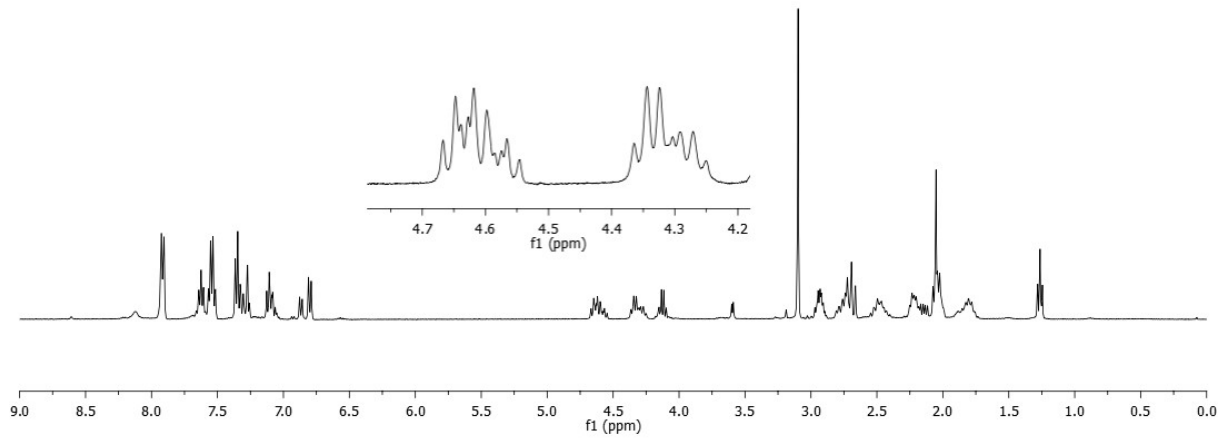

4<sup>th</sup> fraction

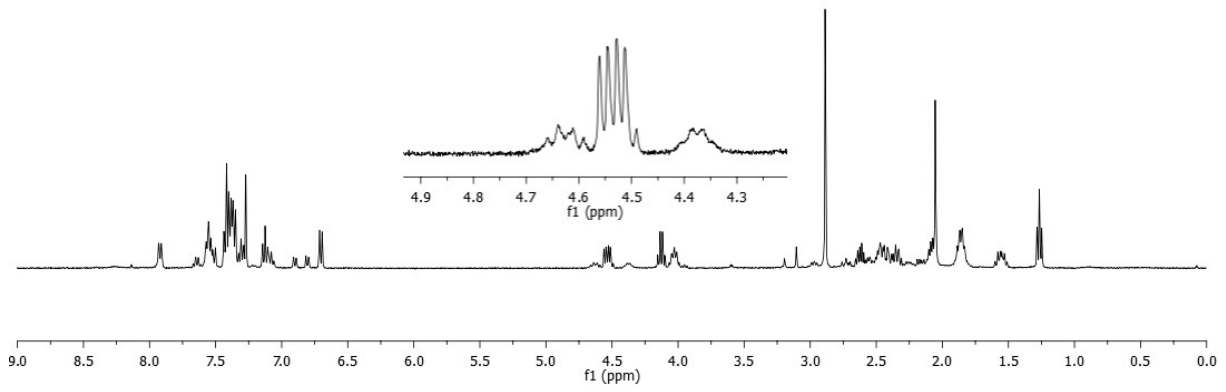

5<sup>th</sup> fraction

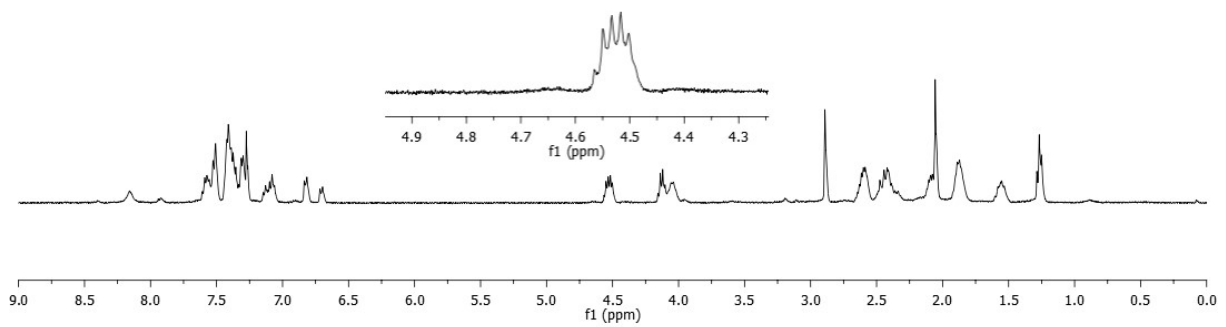

**Figure 7.**  $^1\text{H-NMR}$  Spectrum of compound **4a** ( $\text{CDCl}_3$ , 400 MHz)

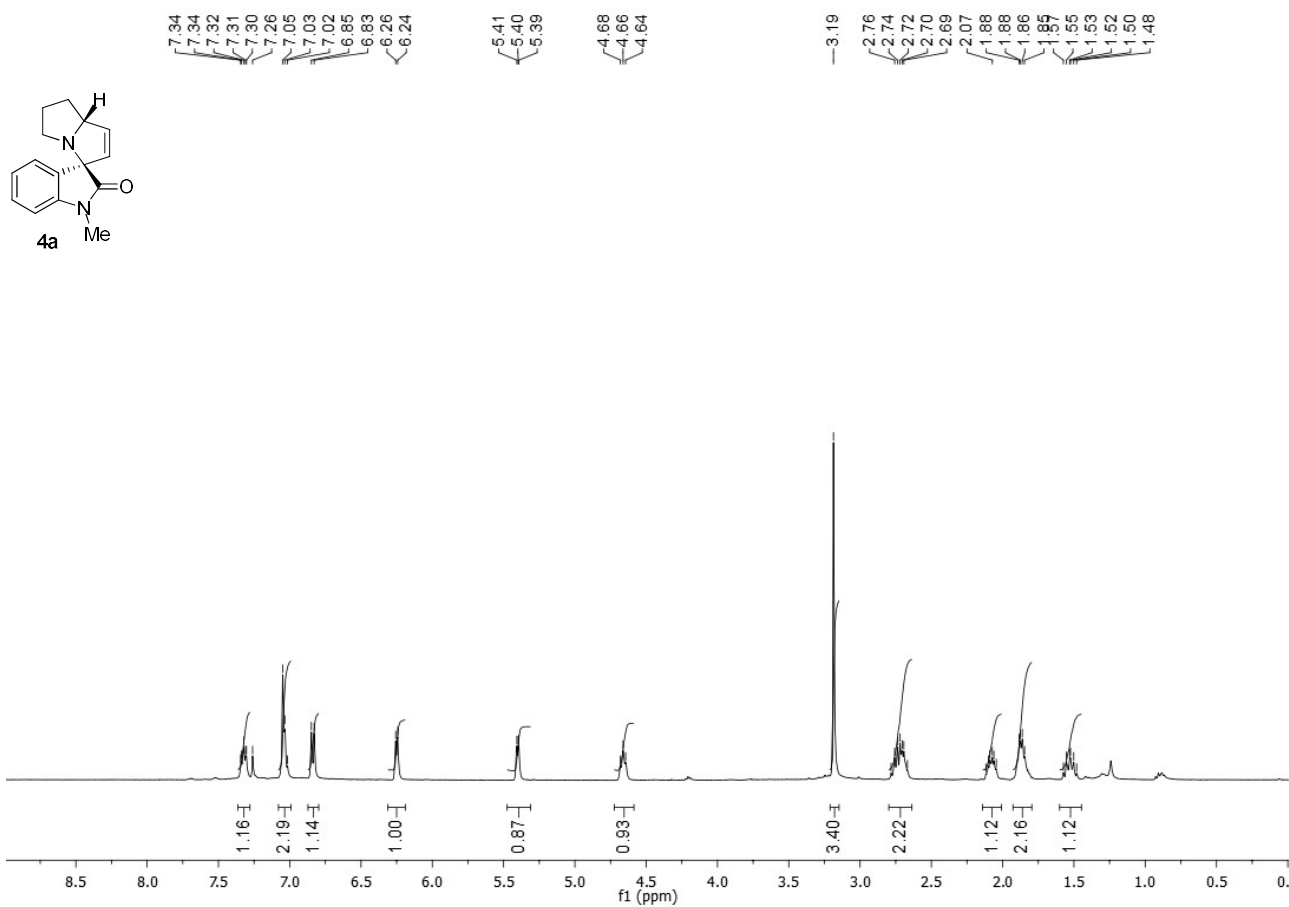

**Figure 8.**  $^{13}\text{C-NMR}$  Spectrum of compound **4a** ( $\text{CDCl}_3$ , 100 MHz)

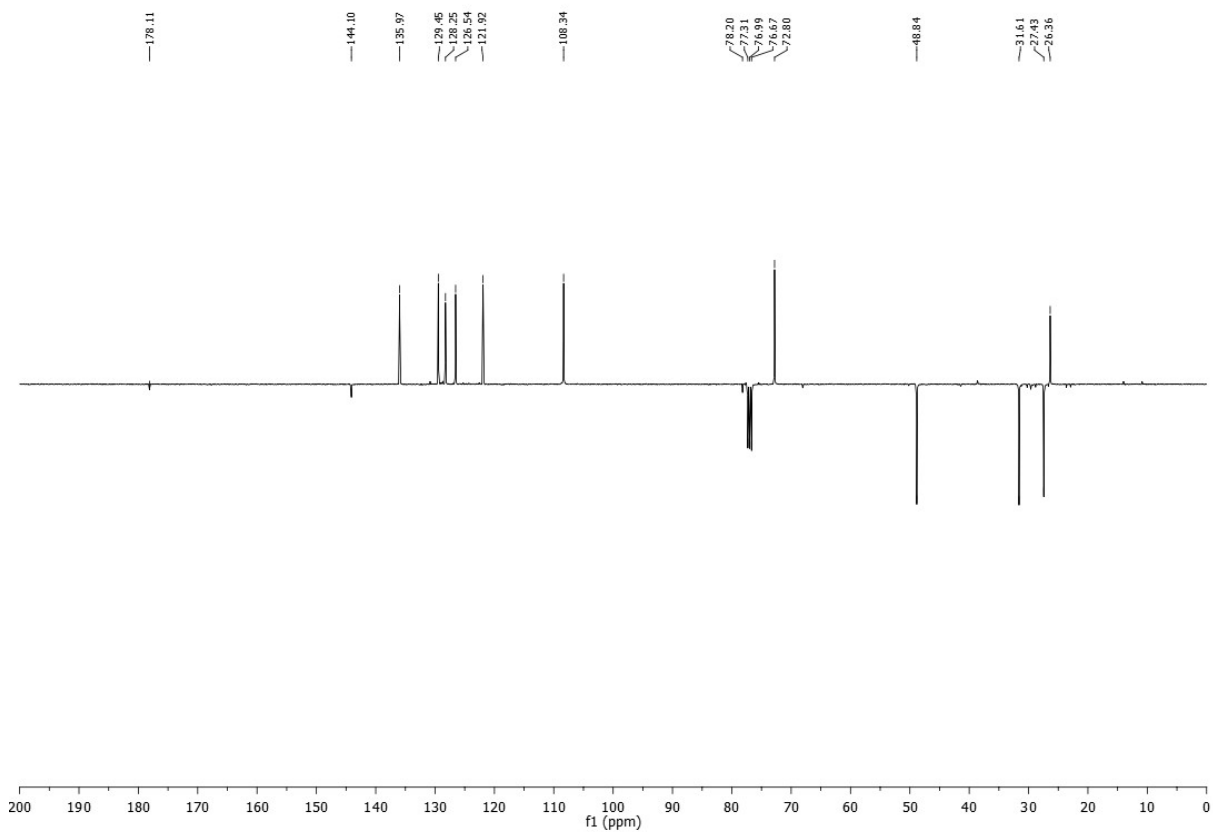

**Figure 9.** HETCOR ( $^1\text{H}$ - $^{13}\text{C}$ ) experiment for compound **4a**

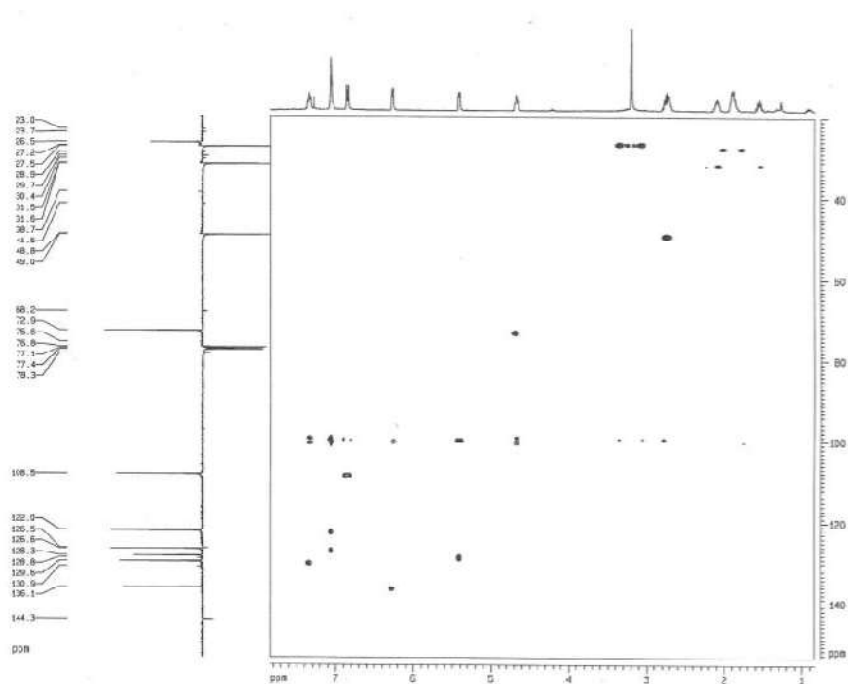

**Figure 10.** NOESY experiment for compound **4a**

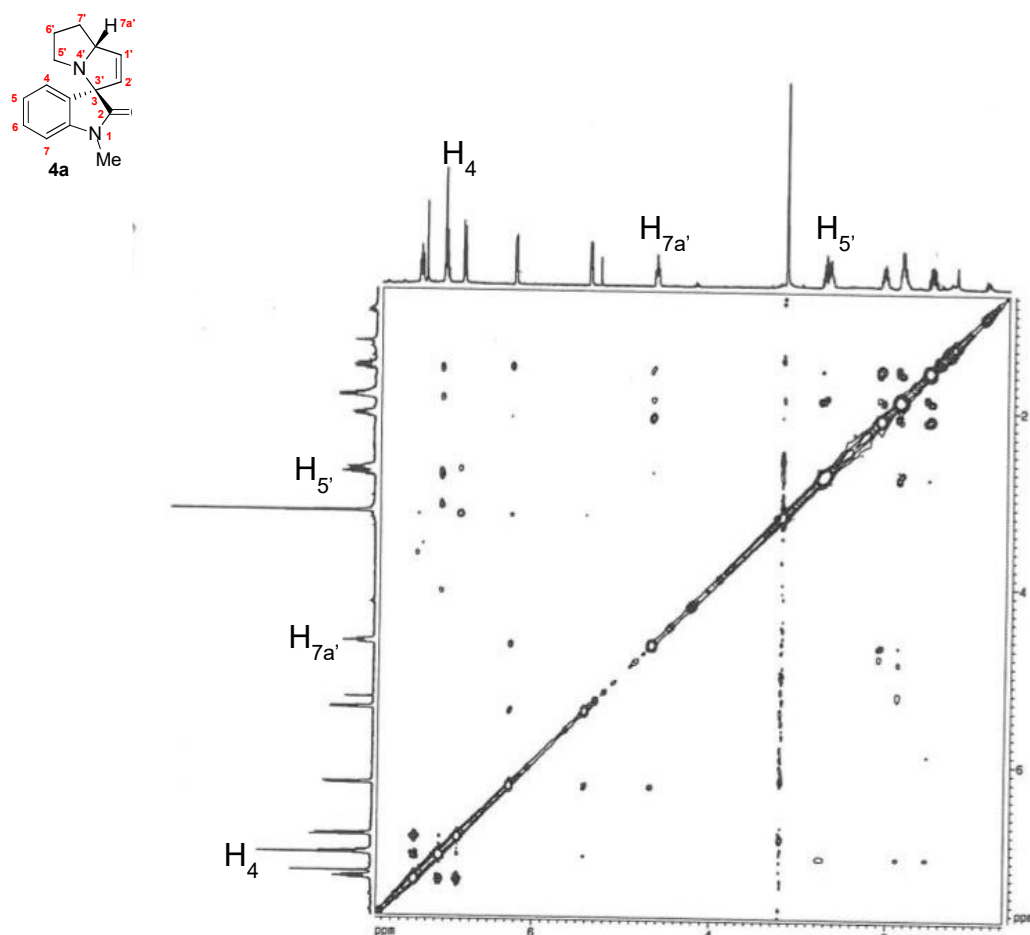

Figure 11.  $^1\text{H-NMR}$  Spectrum of compound **4b** ( $\text{CDCl}_3$ , 400 MHz)

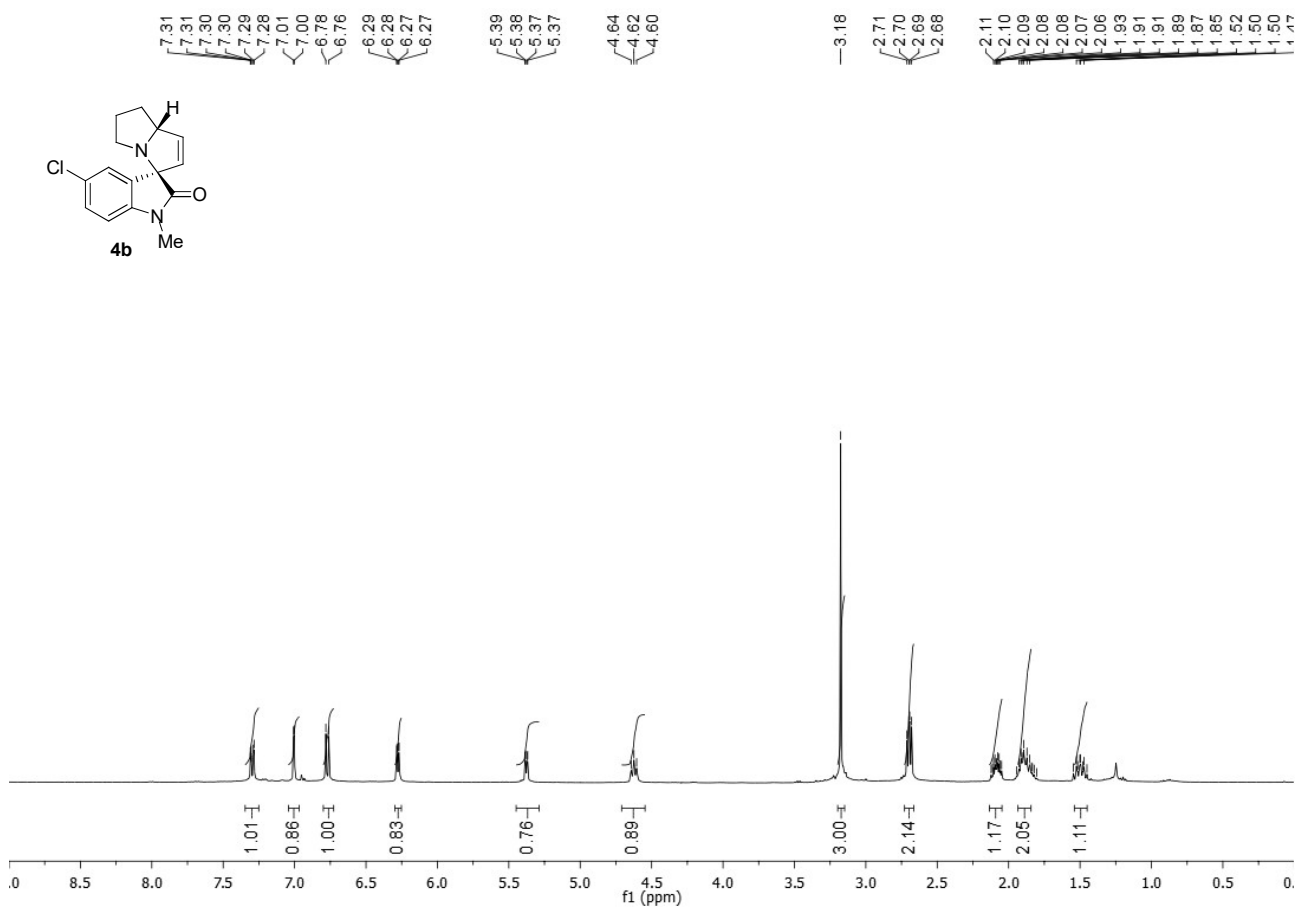

Figure 12.  $^{13}\text{C-NMR}$  Spectrum of compound **4b** ( $\text{CDCl}_3$ , 100 MHz)

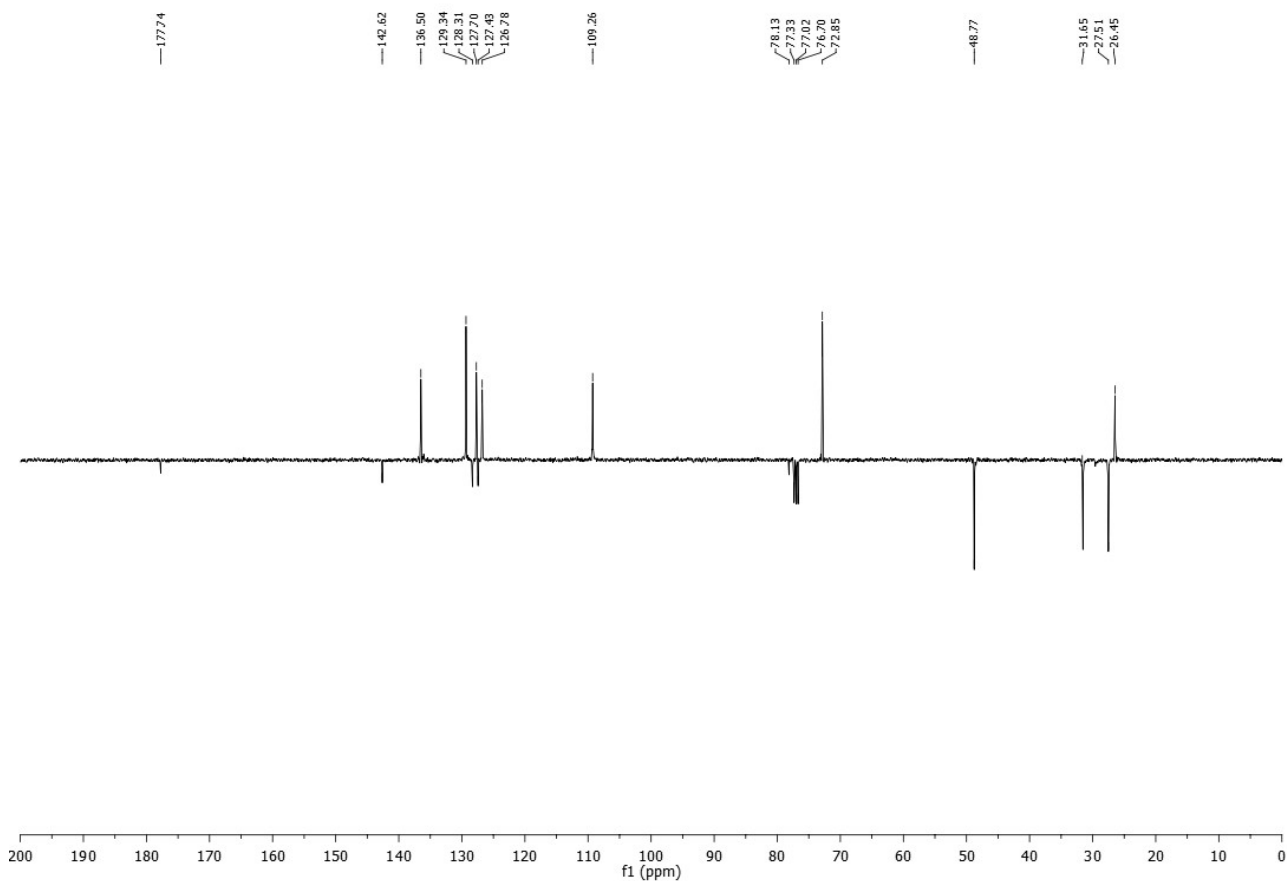



Figure 13.  $^1\text{H-NMR}$  Spectrum of compound **4c** ( $\text{CDCl}_3$ , 400 MHz)

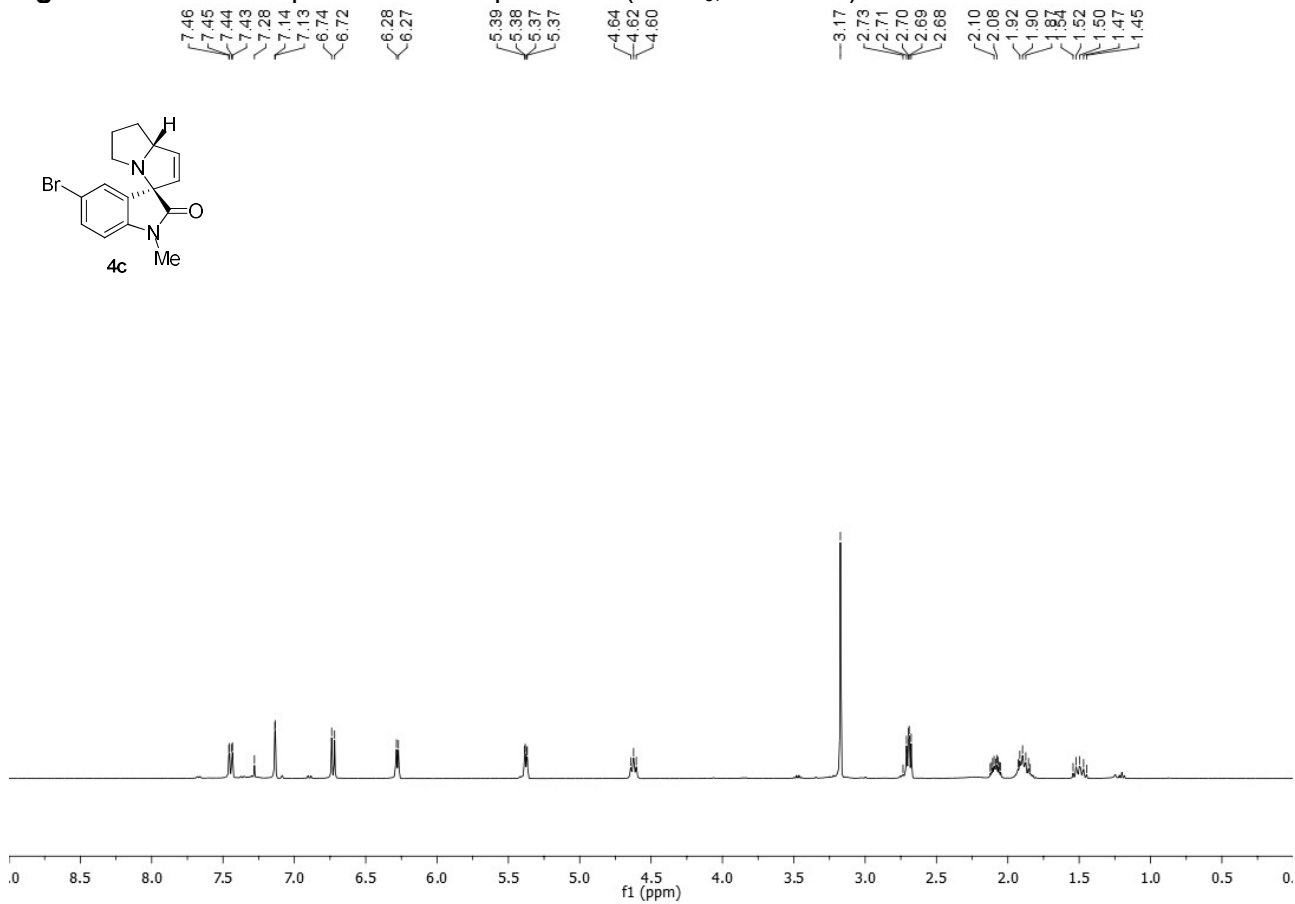

Figure 14.  $^{13}\text{C-NMR}$  Spectrum of compound **4c** ( $\text{CDCl}_3$ , 100 MHz)

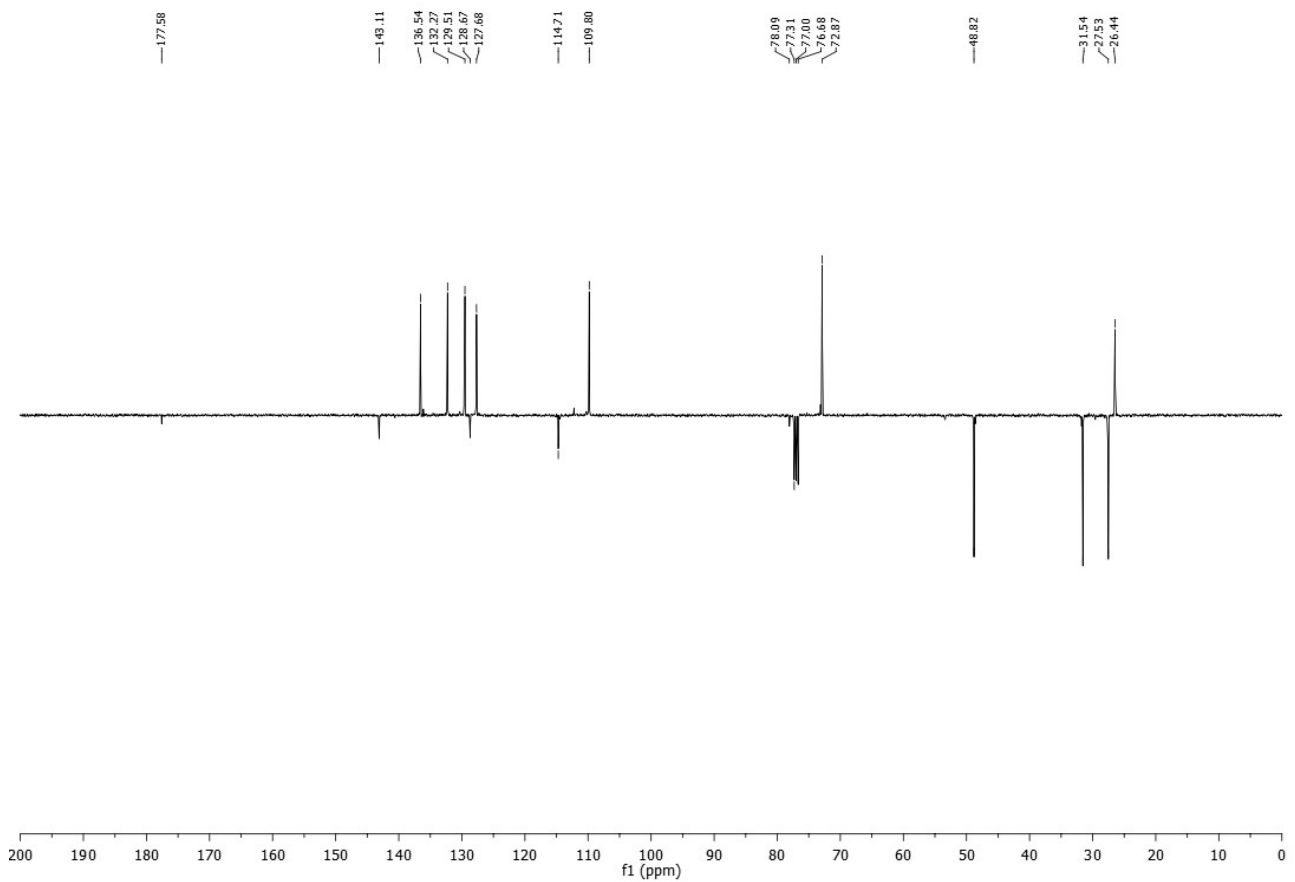

**Figure 15.**  $^1\text{H-NMR}$  Spectrum of compound **4d** ( $\text{CDCl}_3$ , 400 MHz)

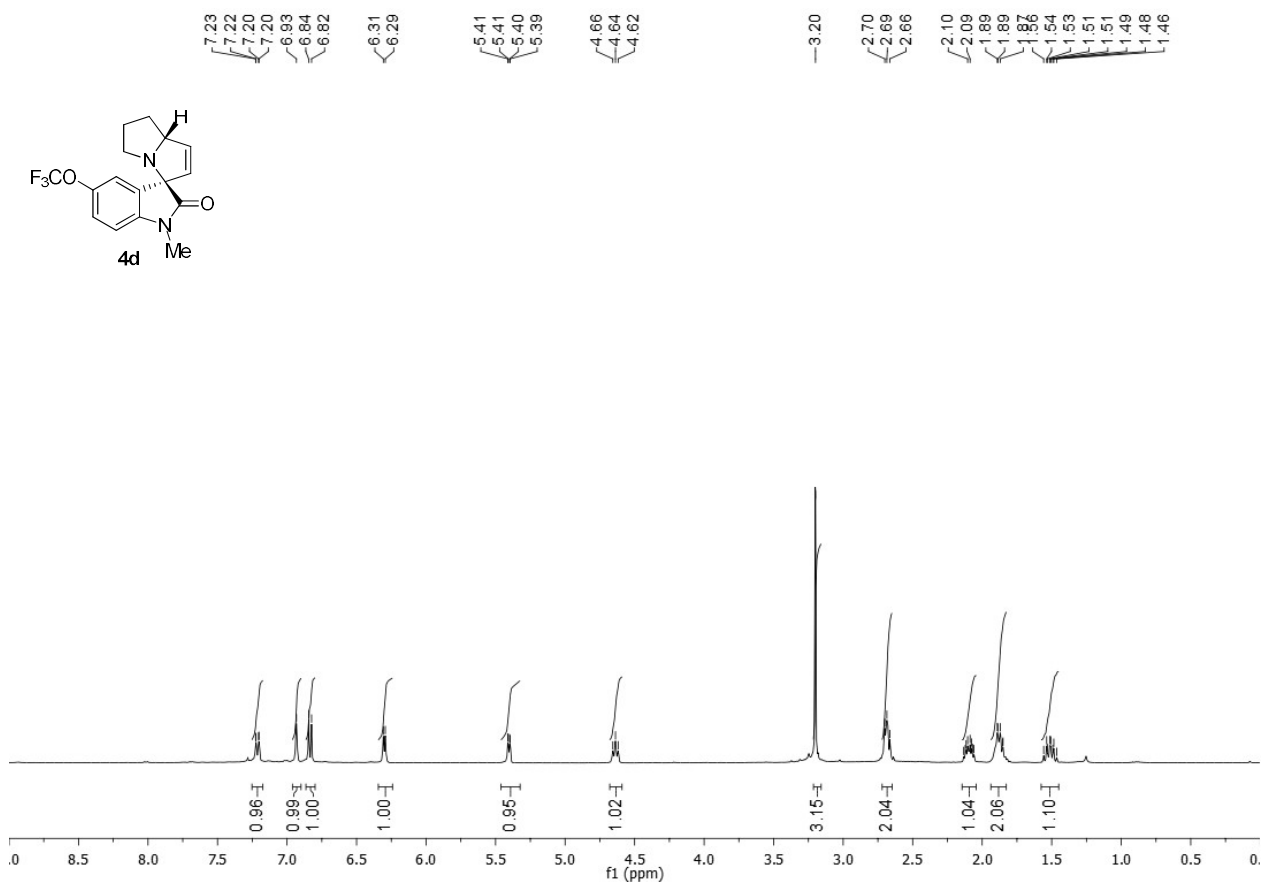

**Figure 16.**  $^{13}\text{C-NMR}$  Spectrum of compound **4d** ( $\text{CDCl}_3$ , 100 MHz)

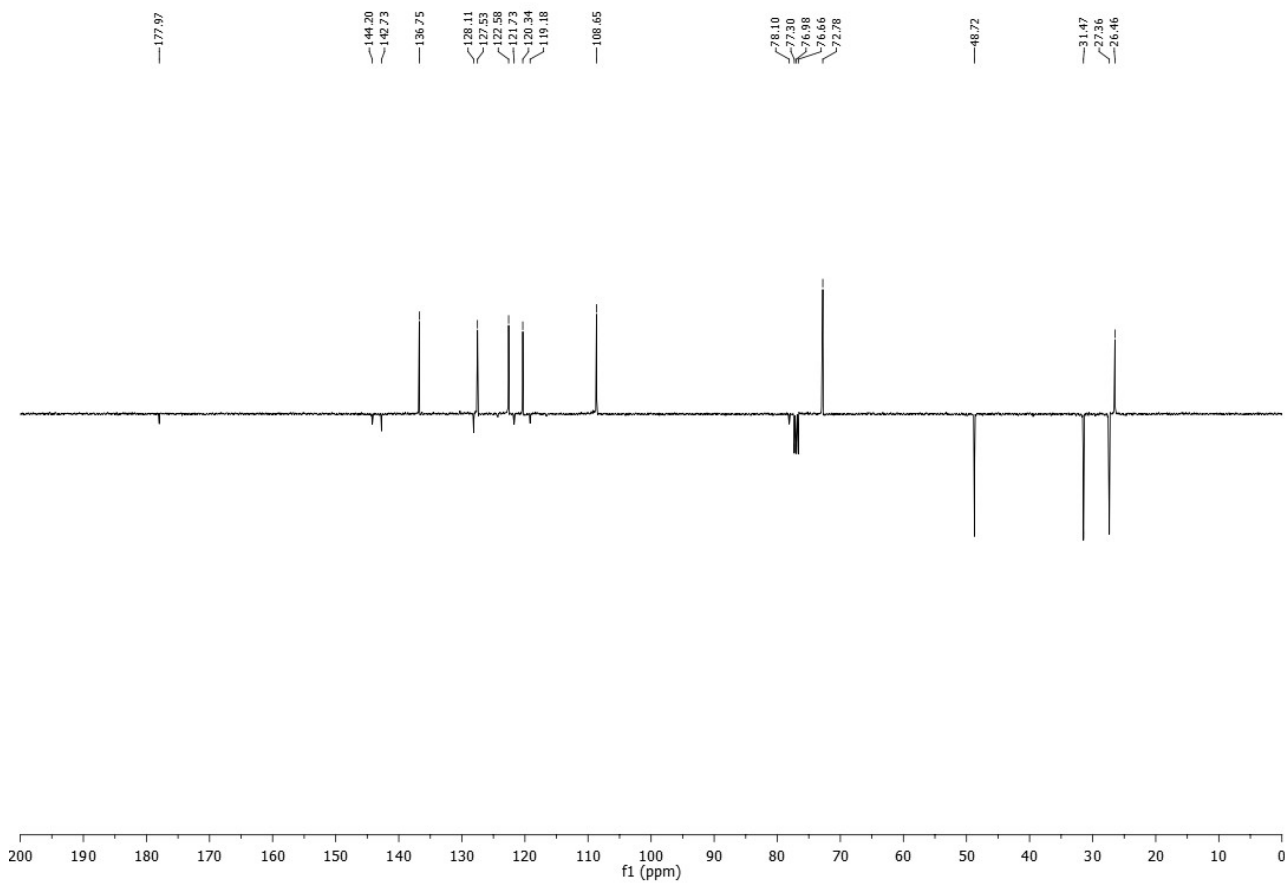

**Figure 17.**  $^1\text{H-NMR}$  Spectrum of compound **4e** ( $\text{CDCl}_3$ , 400 MHz)

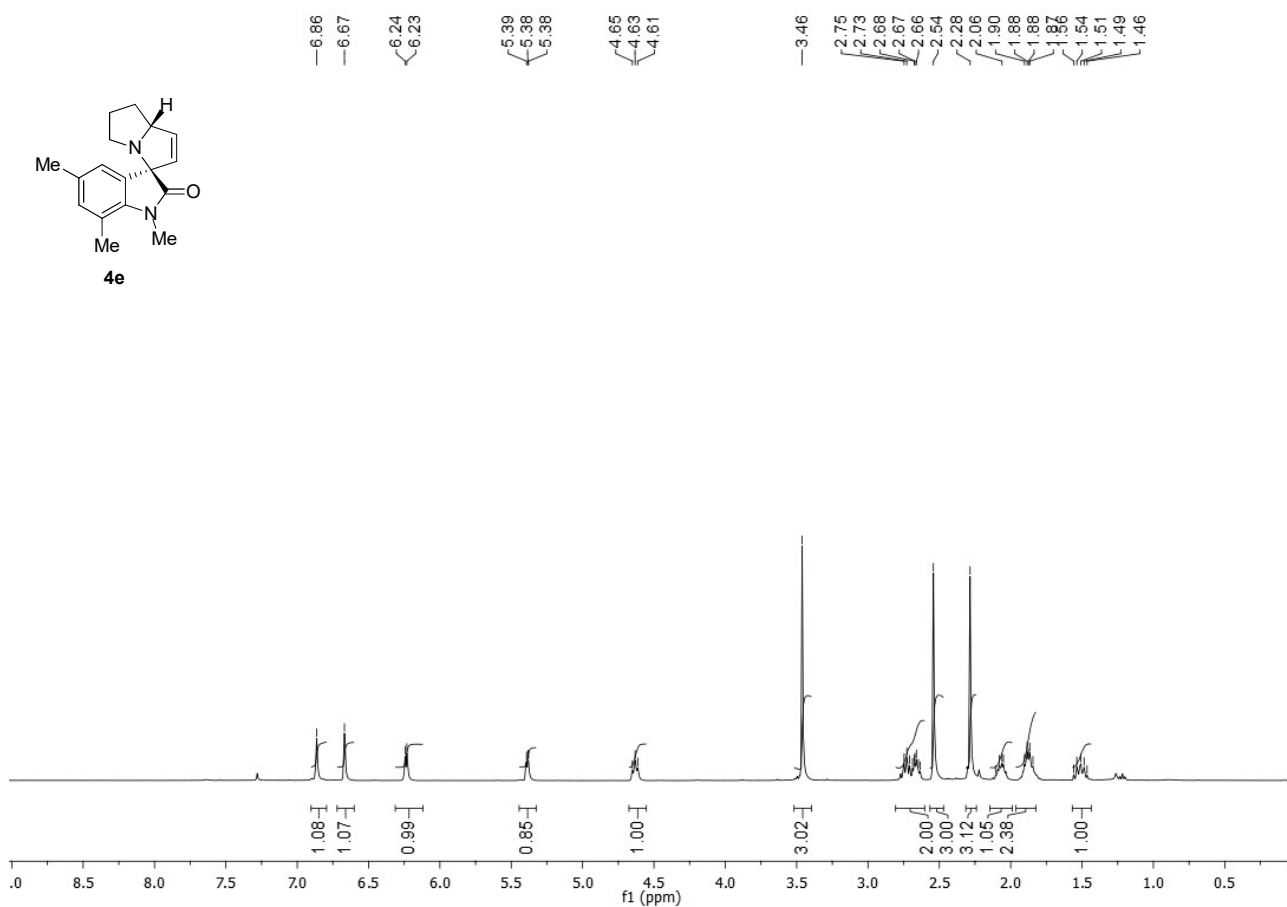

**Figure 18.**  $^{13}\text{C-NMR}$  Spectrum of compound **4e** ( $\text{CDCl}_3$ , 100 MHz)

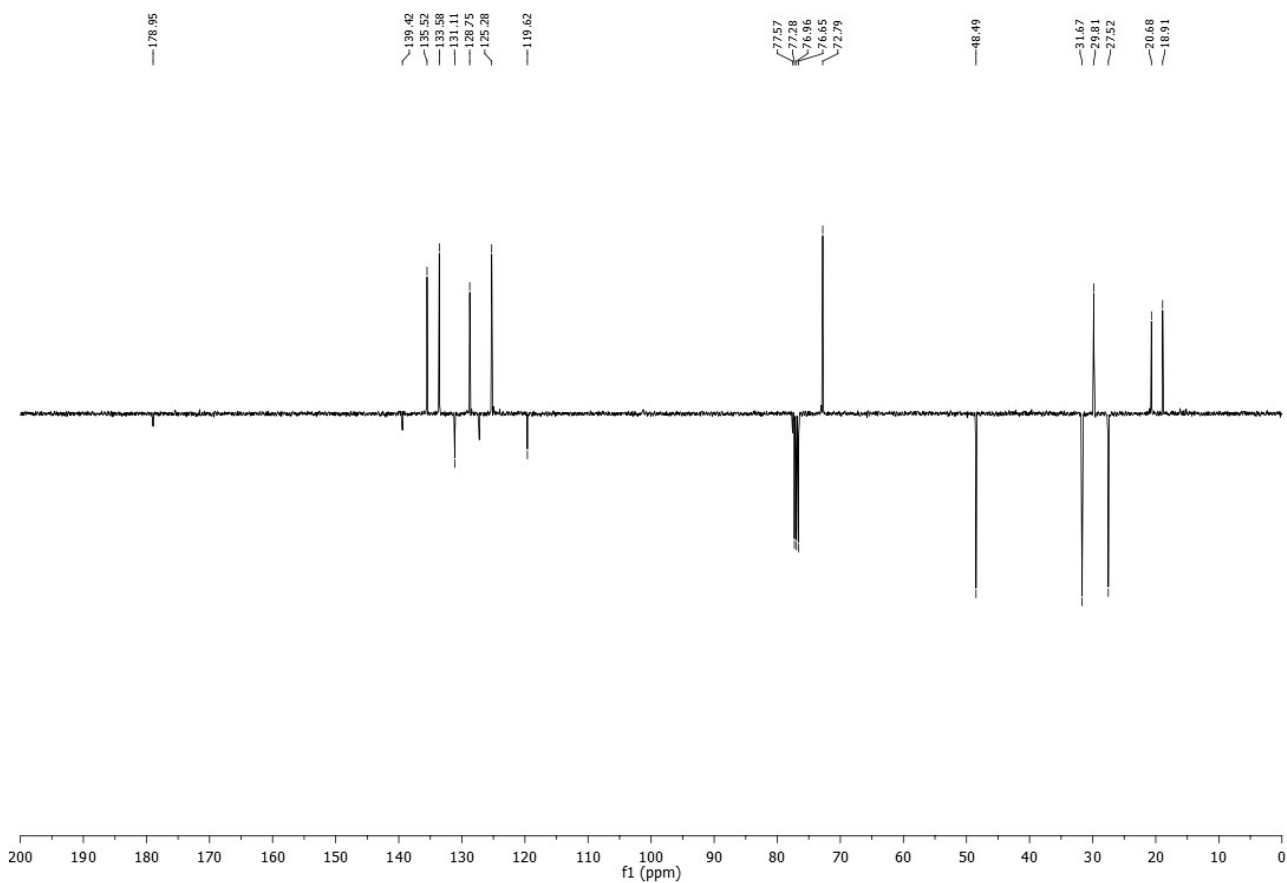

**Figure 19.**  $^1\text{H-NMR}$  Spectrum of compound **4f** ( $\text{CDCl}_3$ , 400 MHz)

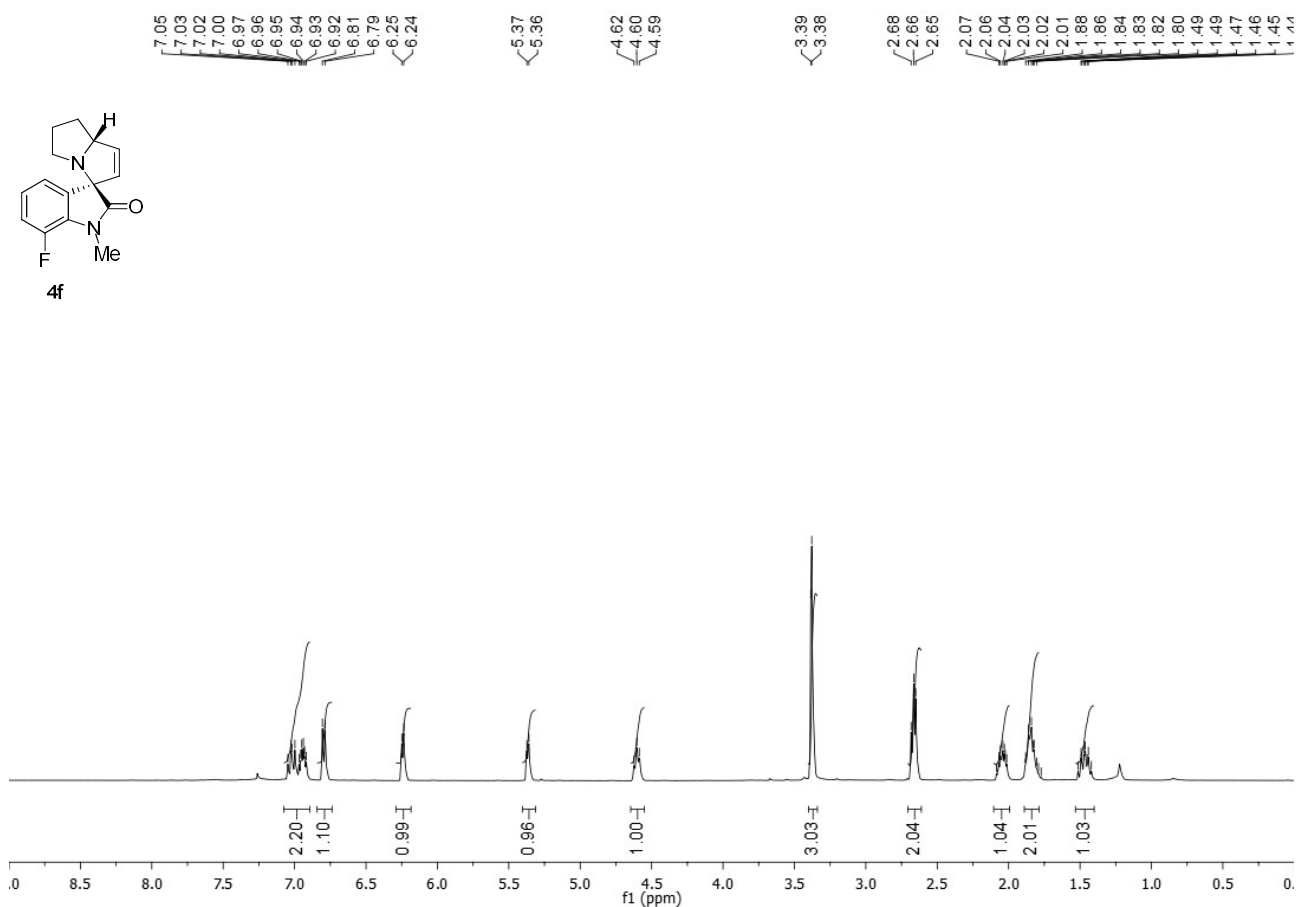

**Figure 20.**  $^{13}\text{C-NMR}$  Spectrum of compound **4f** ( $\text{CDCl}_3$ , 100 MHz)

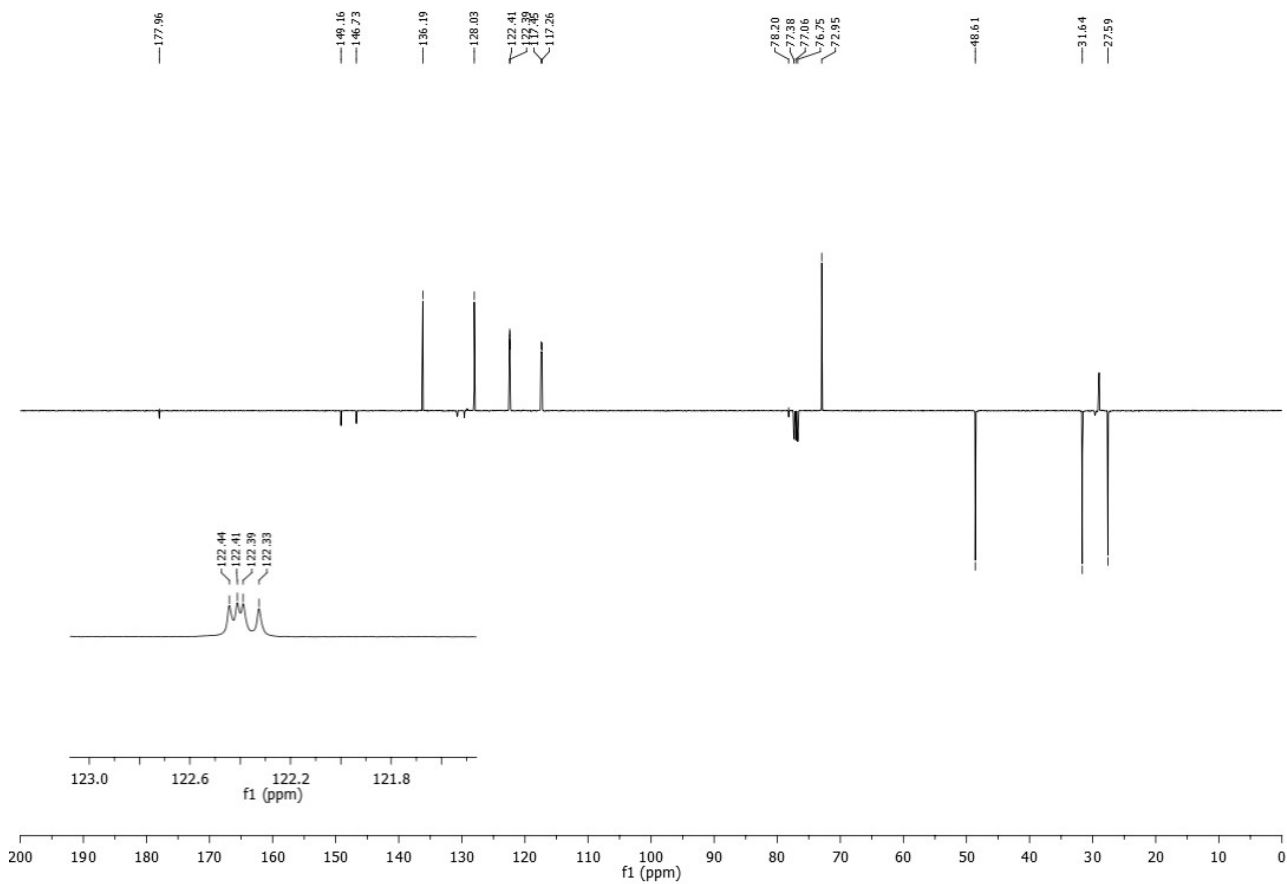

**Figure 21.**  $^1\text{H-NMR}$  Spectrum of compound **4g** ( $\text{CDCl}_3$ , 400 MHz)

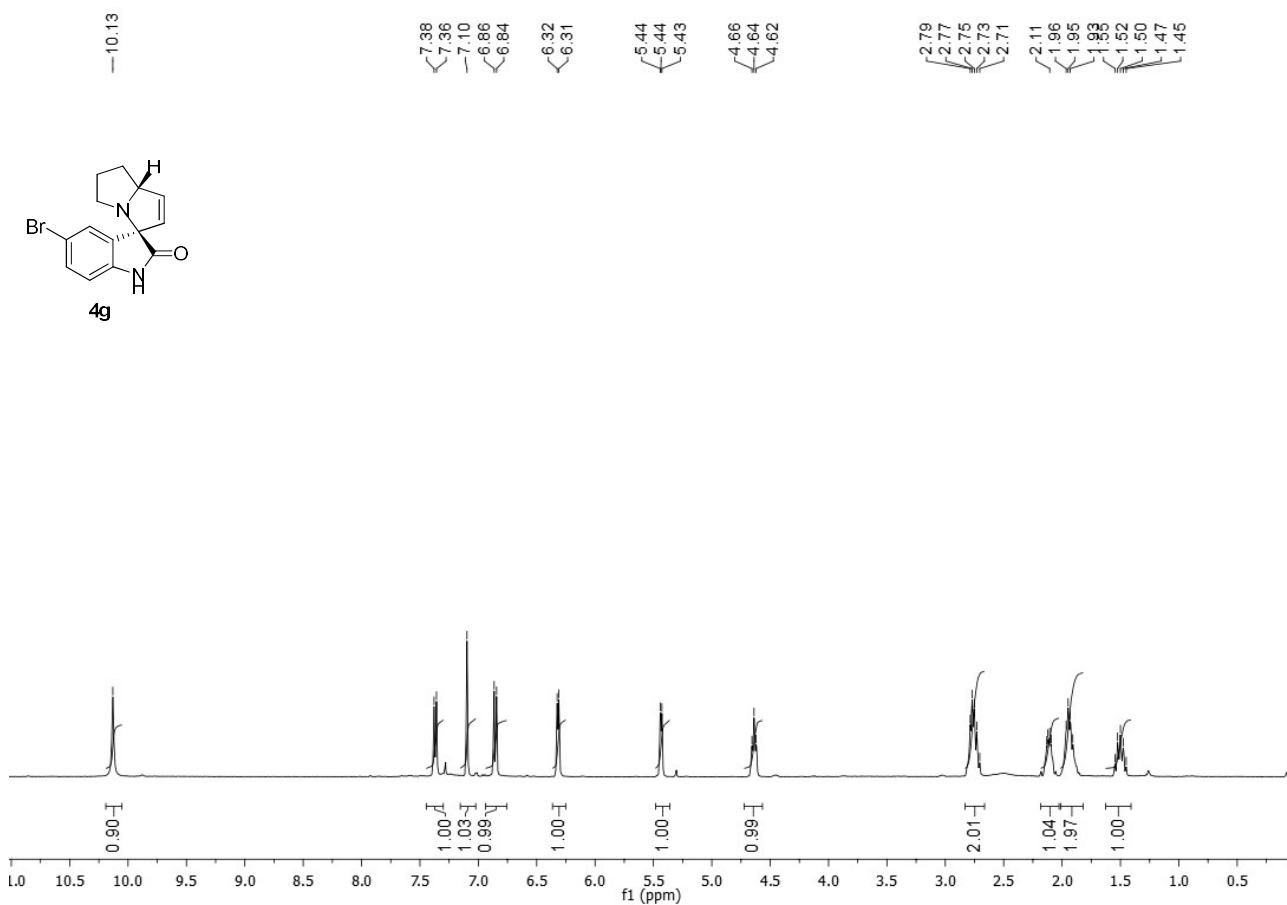

**Figure 22.**  $^{13}\text{C-NMR}$  Spectrum of compound **4g** ( $\text{CDCl}_3$ , 100 MHz)

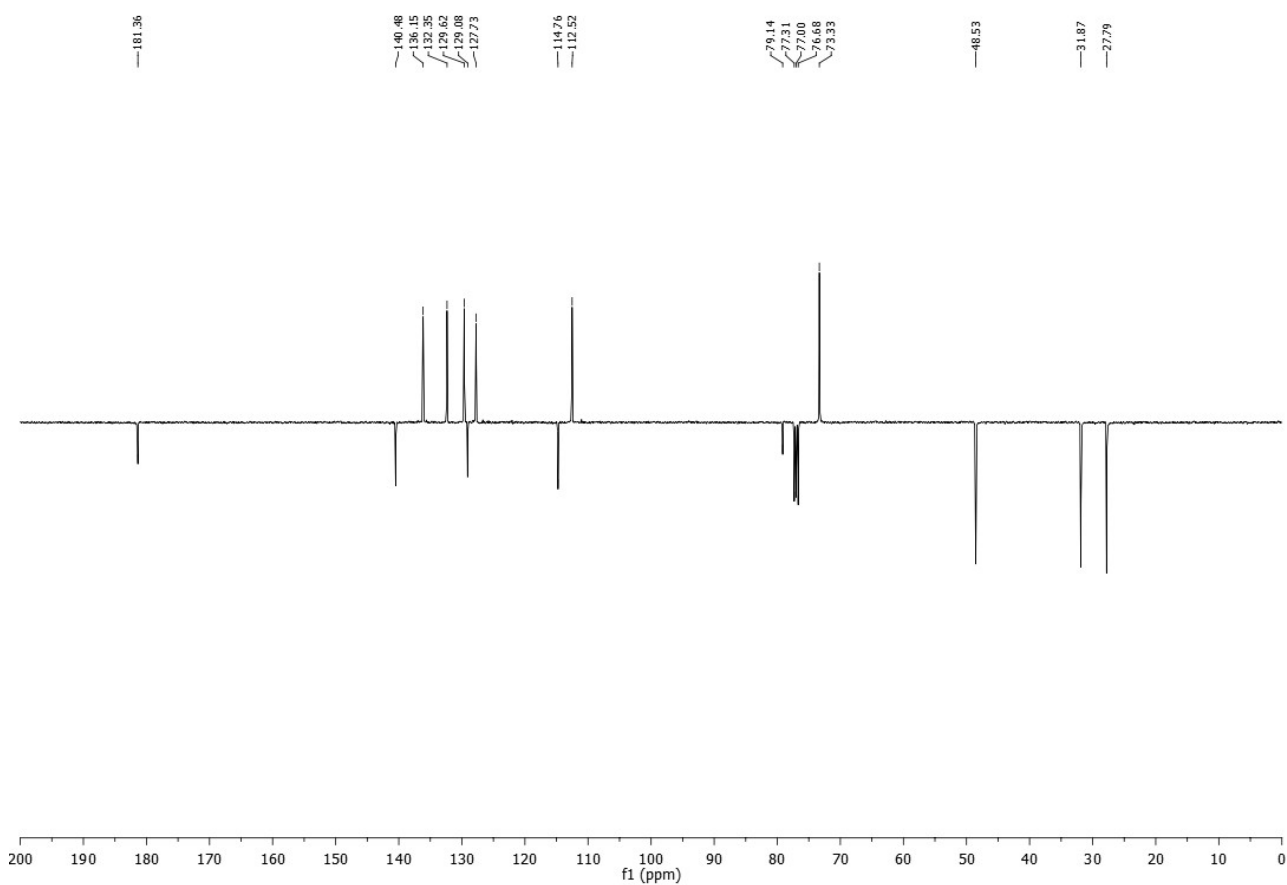

**Figure 23.**  $^1\text{H-NMR}$  Spectrum of compound **4h** ( $\text{CDCl}_3$ , 400 MHz)

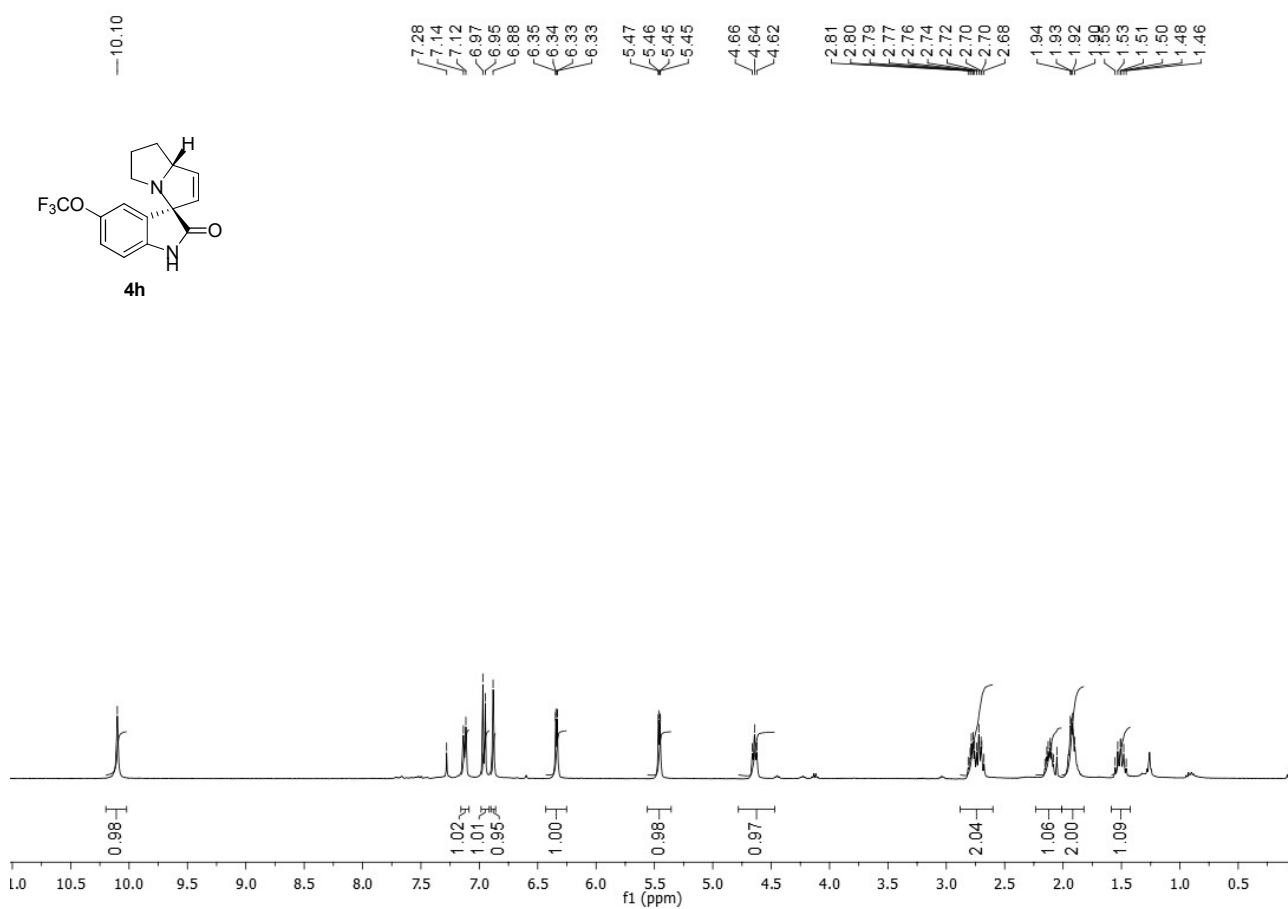

**Figure 24.**  $^{13}\text{C-NMR}$  Spectrum of compound **4h** ( $\text{CDCl}_3$ , 100 MHz)

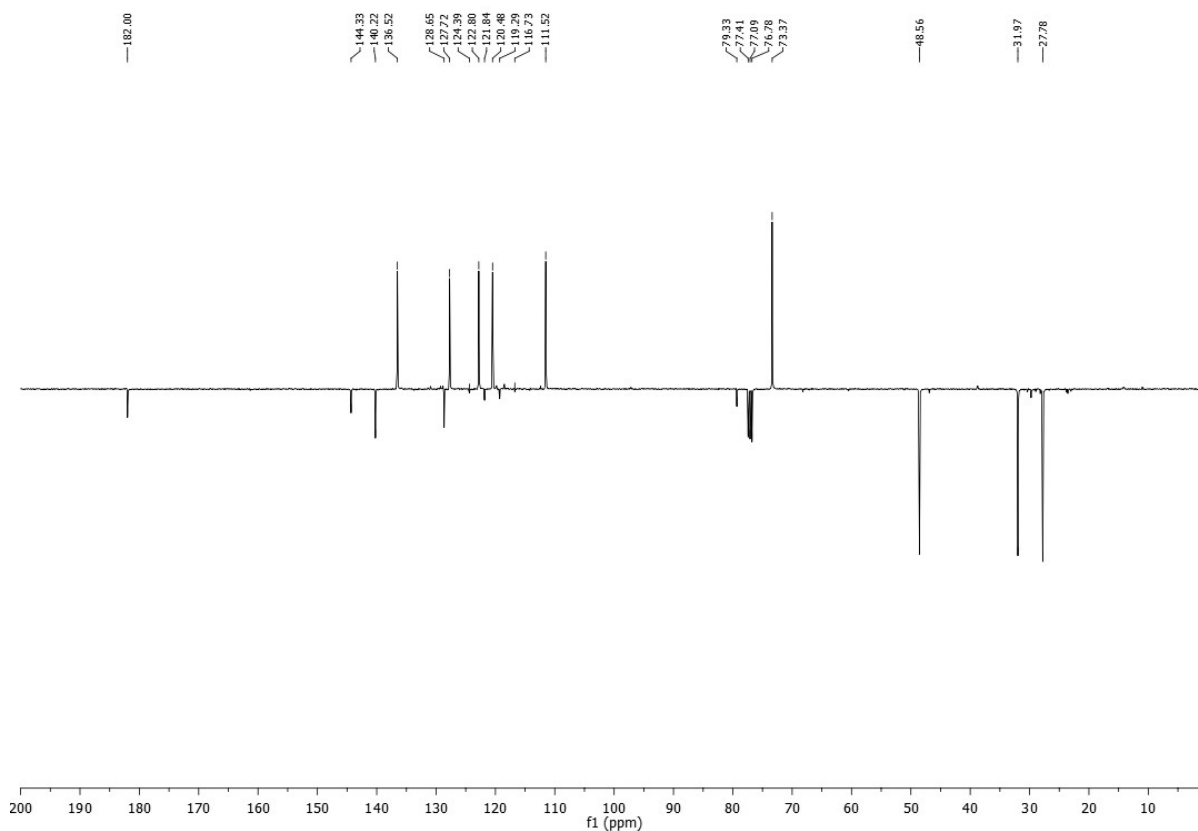

**Figure 25.**  $^1\text{H-NMR}$  Spectrum of compound **4i** (DMSO- $d_6$ , 400 MHz)

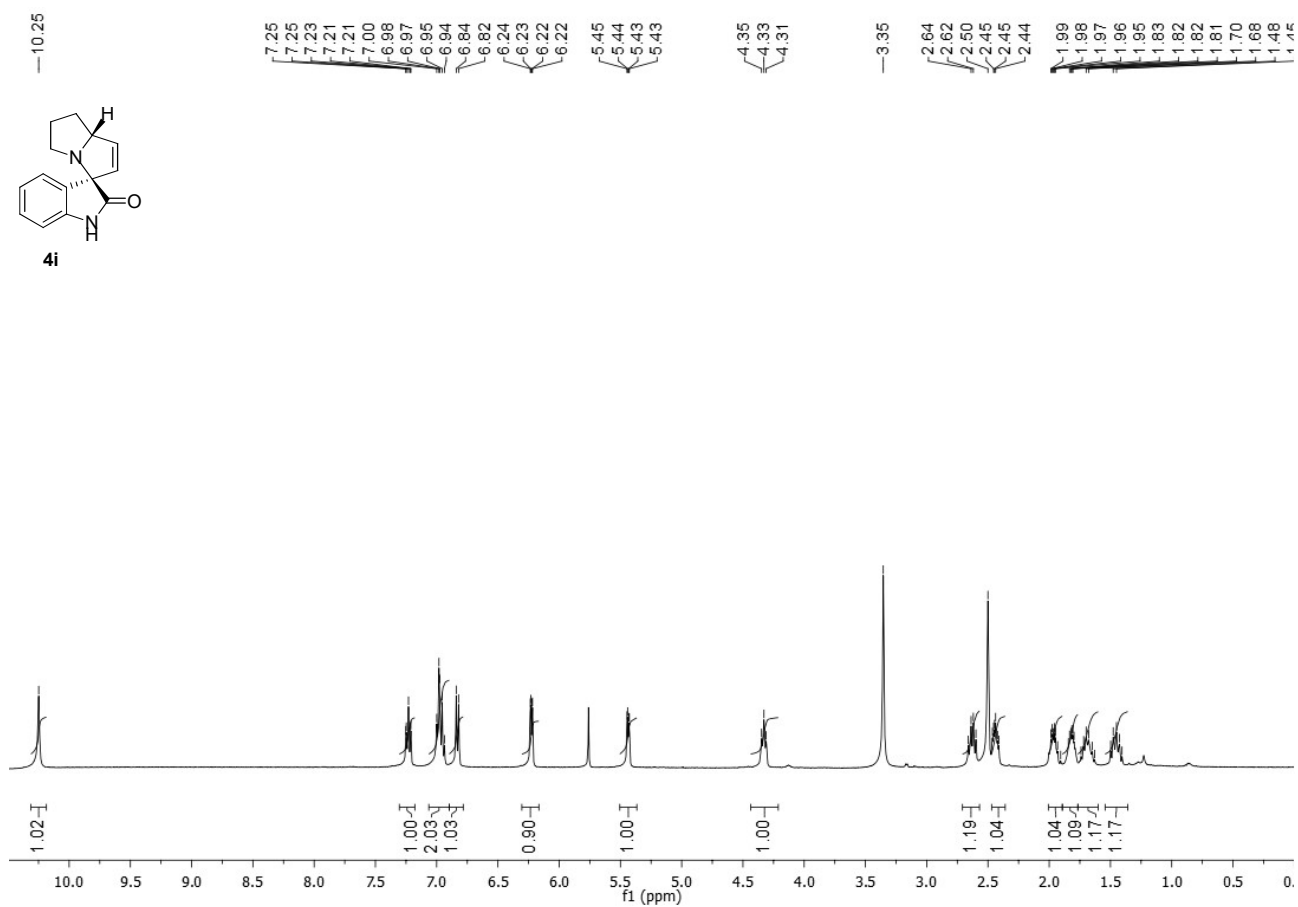

**Figure 26.**  $^{13}\text{C-NMR}$  Spectrum of compound **4i** (DMSO- $d_6$ , 100 MHz)

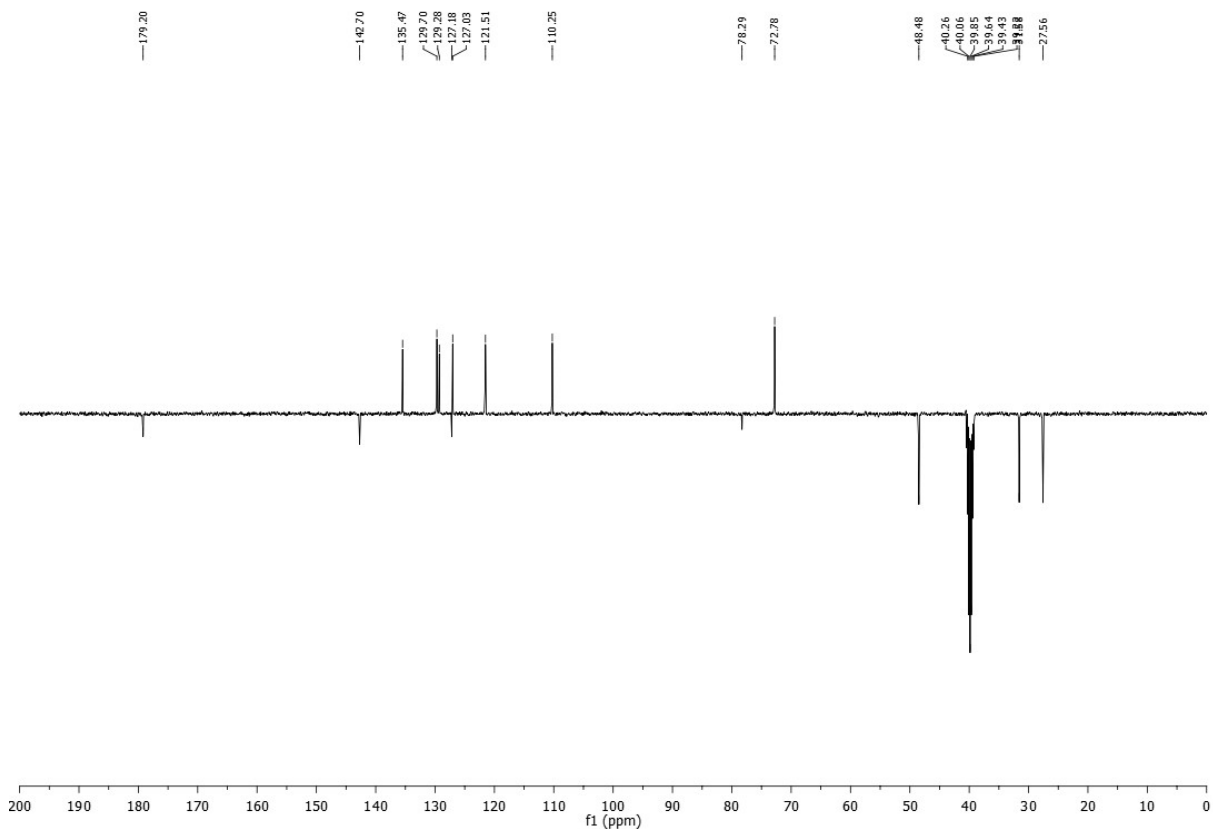

**Figure 27.**  $^1\text{H-NMR}$  Spectrum of compound **4j** ( $\text{CDCl}_3$ , 400 MHz)

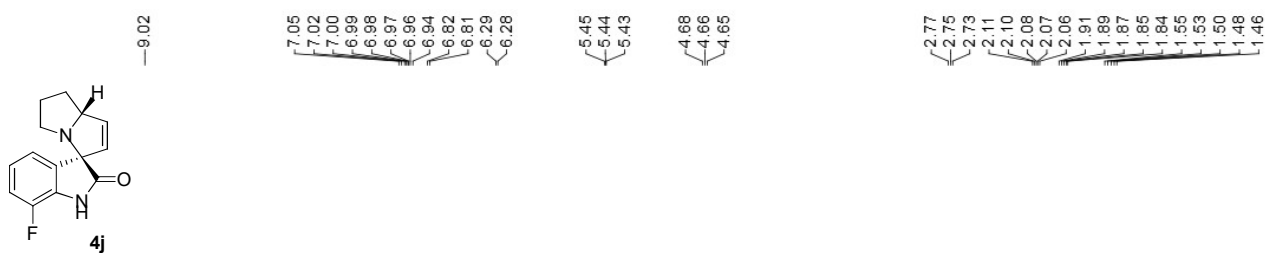

**Figure 28.**  $^{13}\text{C-NMR}$  Spectrum of compound **4j** ( $\text{CDCl}_3$ , 100 MHz)

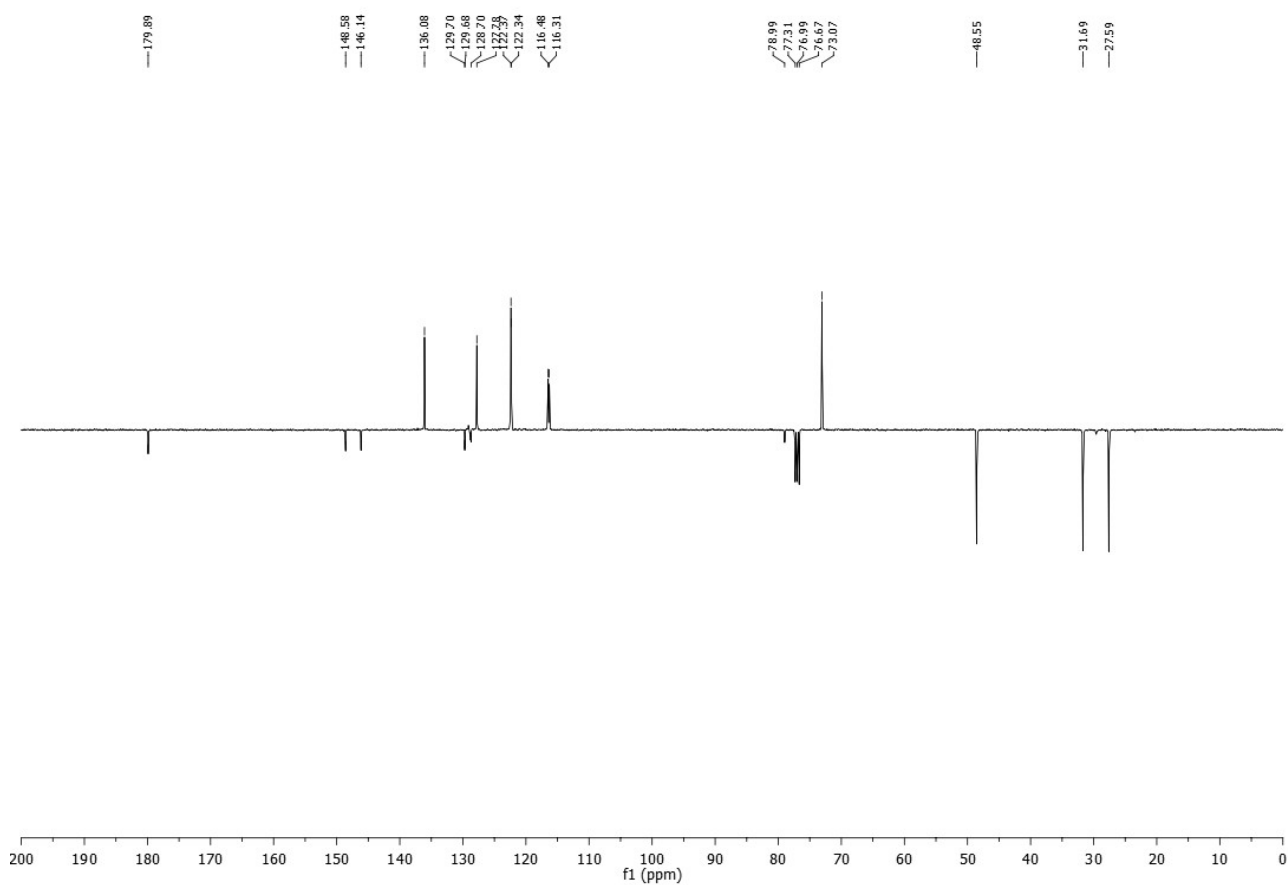



**Figure 29.**  $^1\text{H-NMR}$  Spectrum of compound **4k** ( $\text{DMSO-}d_6$ , 400 MHz)

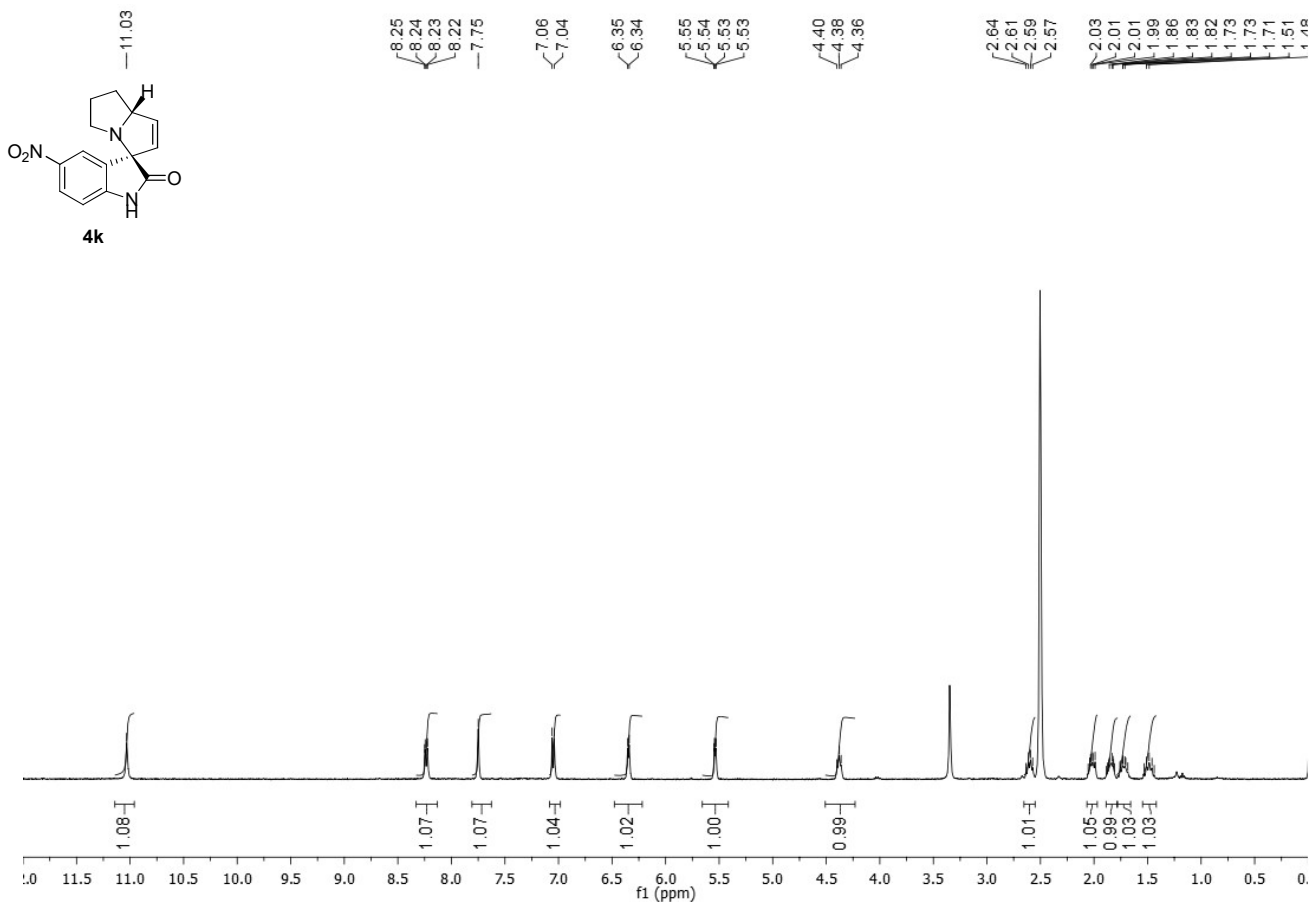

**Figure 30.**  $^{13}\text{C-NMR}$  Spectrum of compound **4k** ( $\text{DMSO-}d_6$ , 100 MHz)

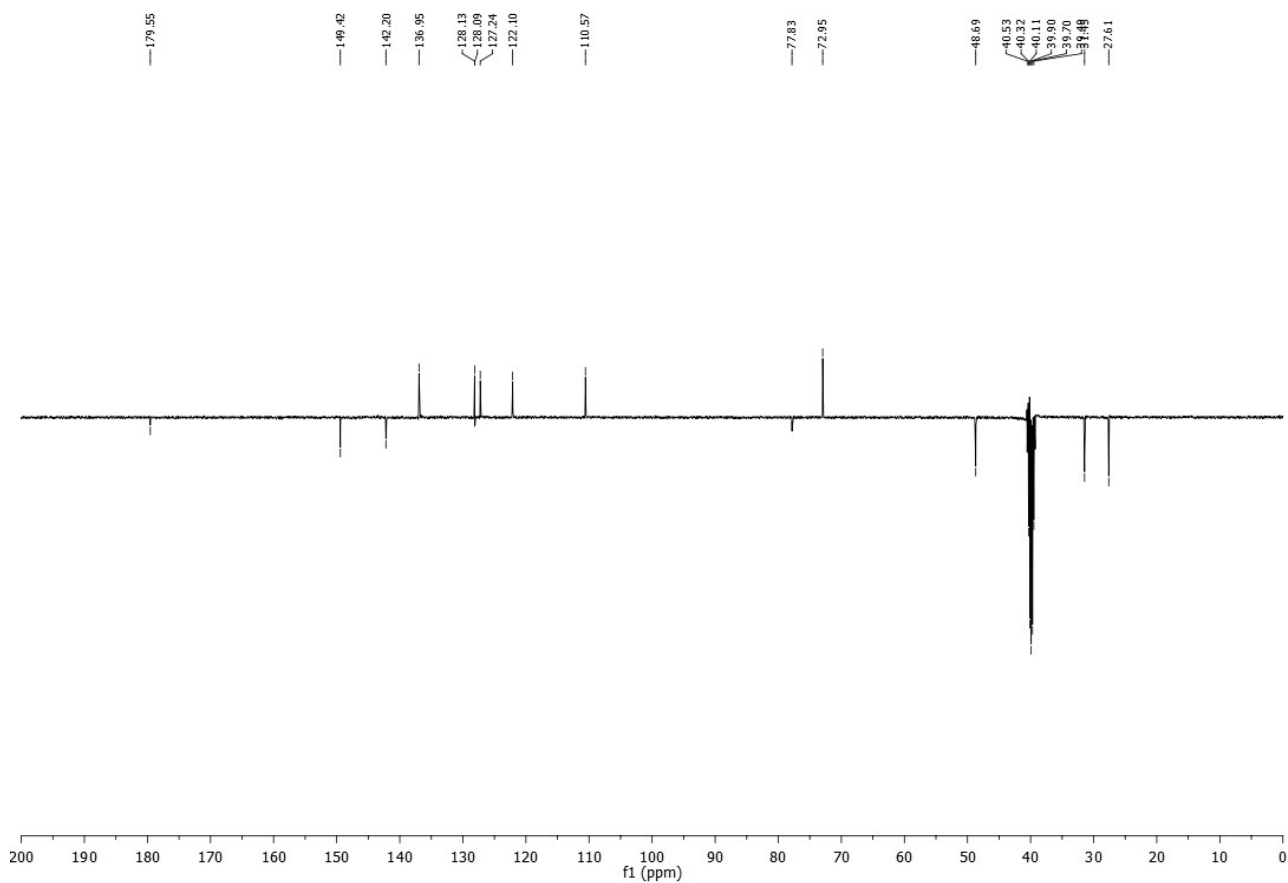

**Figure 31.**  $^1\text{H-NMR}$  Spectrum of compound **4I** ( $\text{CDCl}_3$ , 400 MHz)

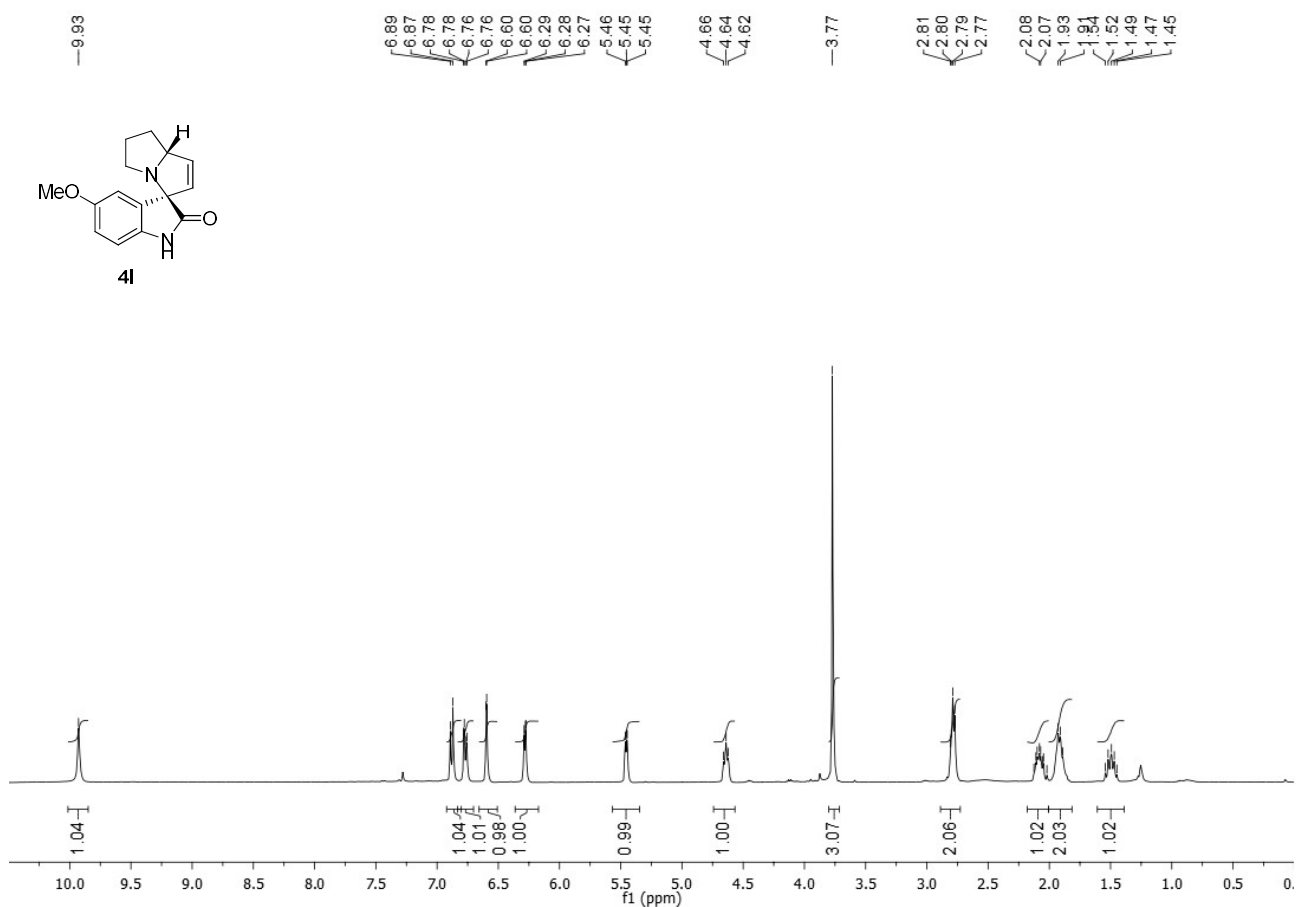

**Figure 32.**  $^{13}\text{C-NMR}$  Spectrum of compound **4I** ( $\text{CDCl}_3$ , 100 MHz)

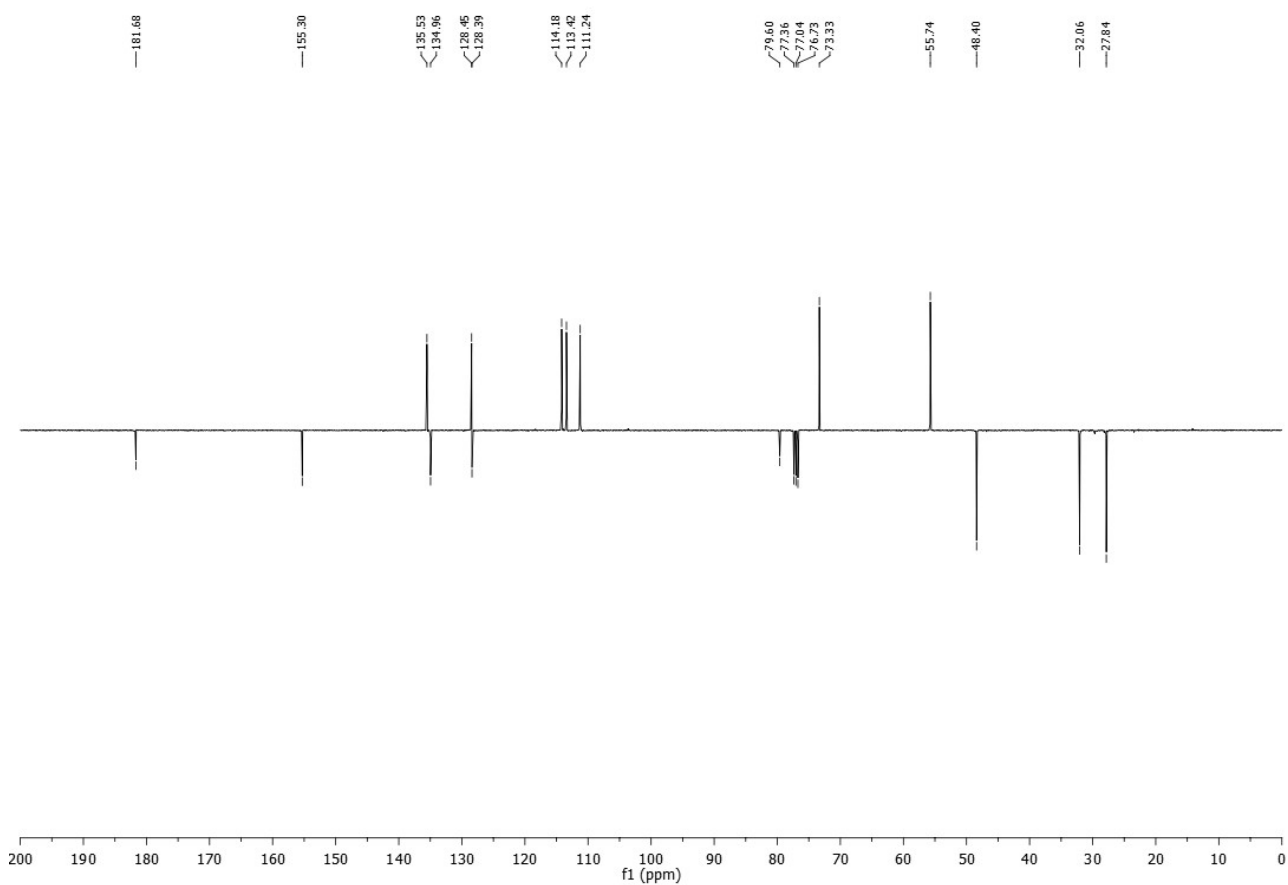

**Figure 33.**  $^1\text{H-NMR}$  Spectrum of compound **4m** ( $\text{CDCl}_3$ , 400 MHz)

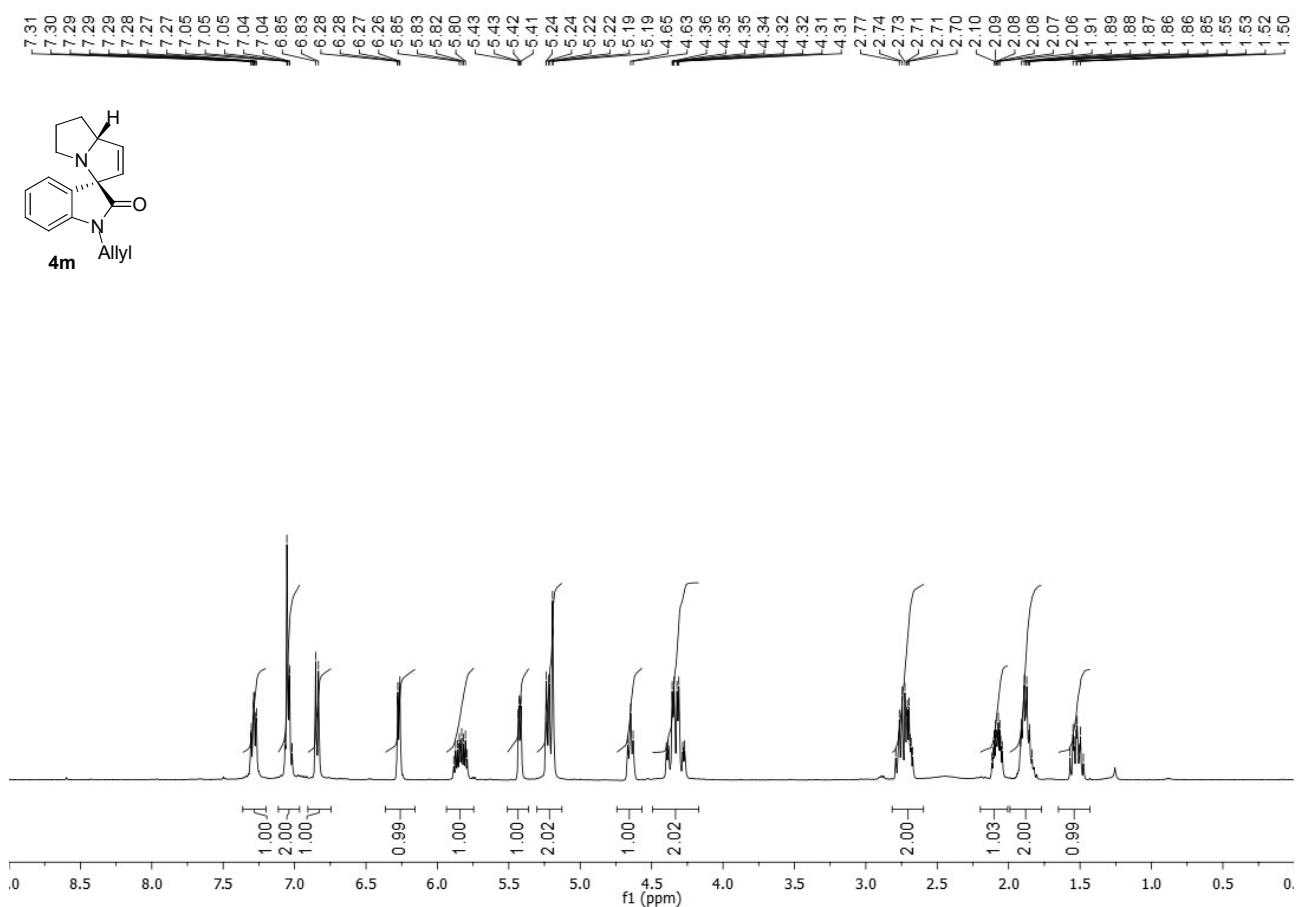

**Figure 34.**  $^{13}\text{C-NMR}$  Spectrum of compound **4m** ( $\text{CDCl}_3$ , 100 MHz)

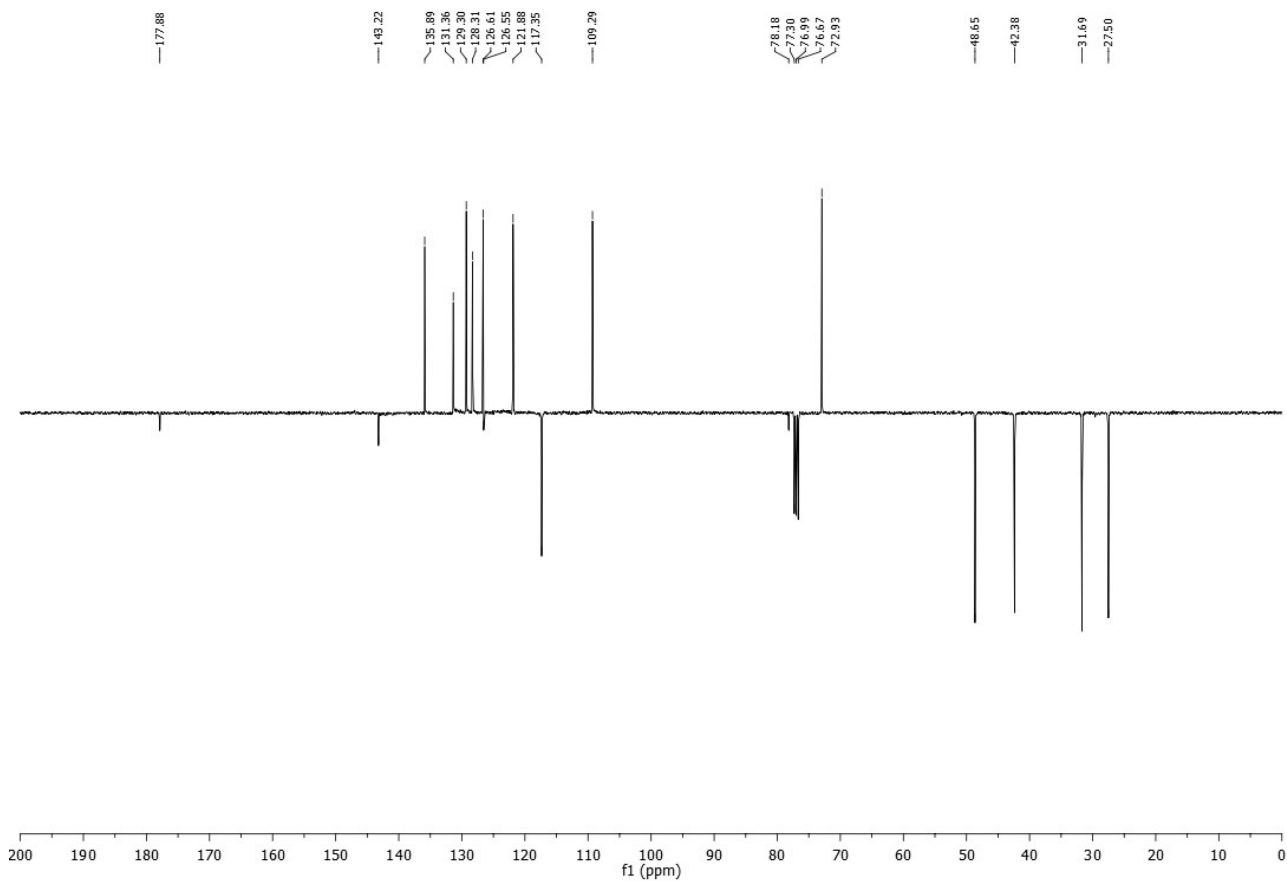

**Figure 35.**  $^1\text{H-NMR}$  Spectrum of compound **4n** ( $\text{CDCl}_3$ , 400 MHz)

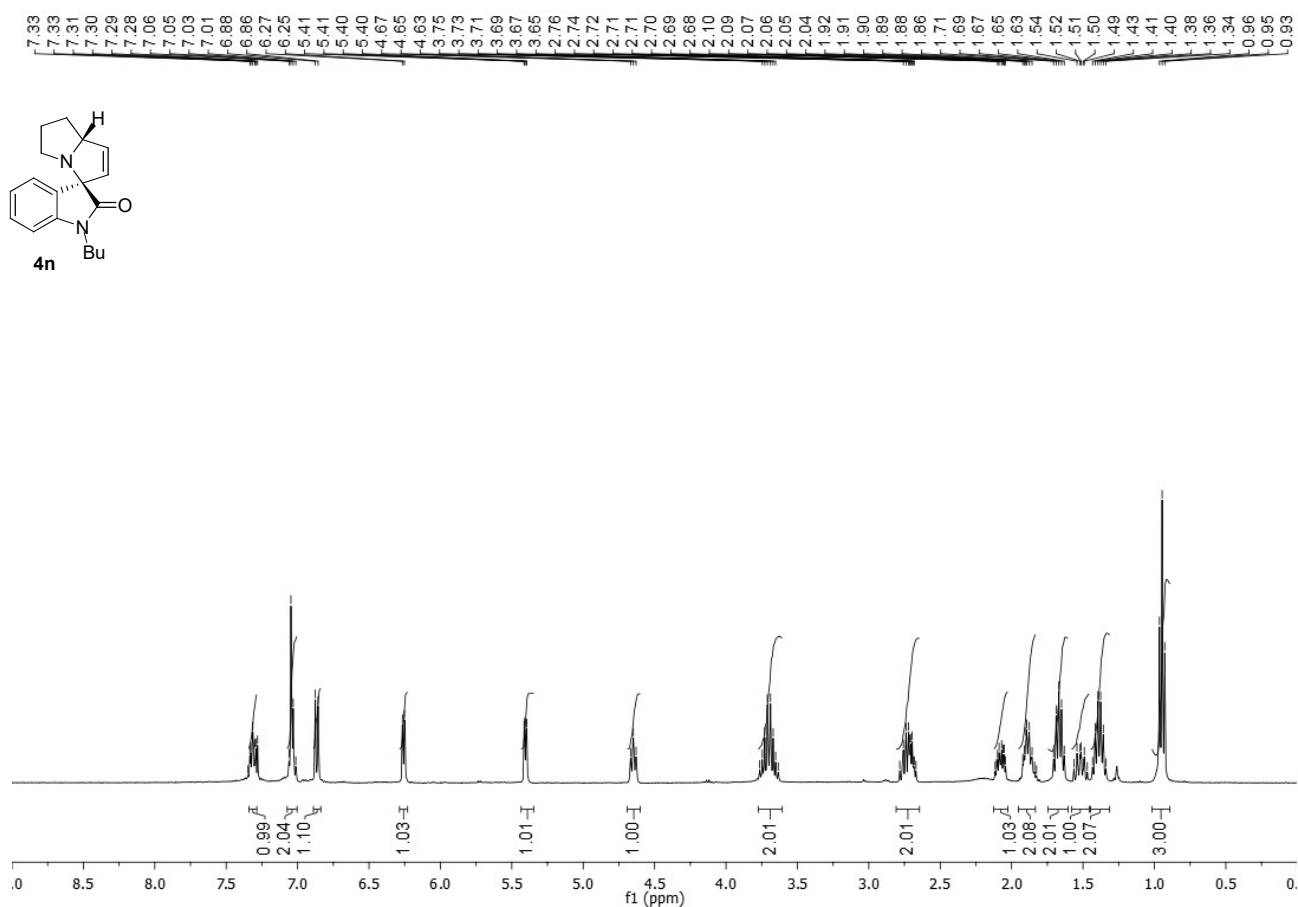

**Figure 36.**  $^{13}\text{C-NMR}$  Spectrum of compound **4n** ( $\text{CDCl}_3$ , 100 MHz)

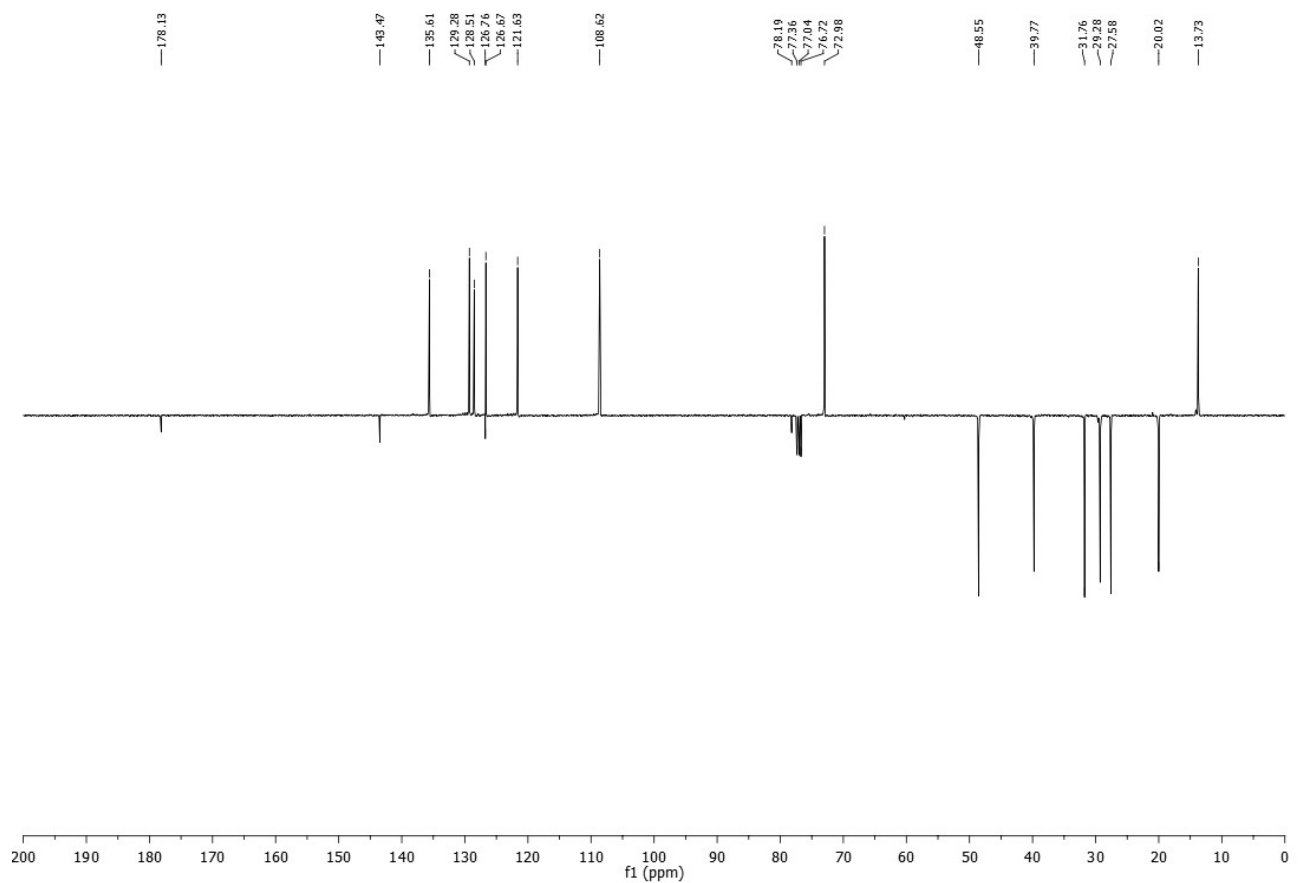

**Figure 37.**  $^1\text{H-NMR}$  Spectrum of compound **4o** ( $\text{CDCl}_3$ , 400 MHz)

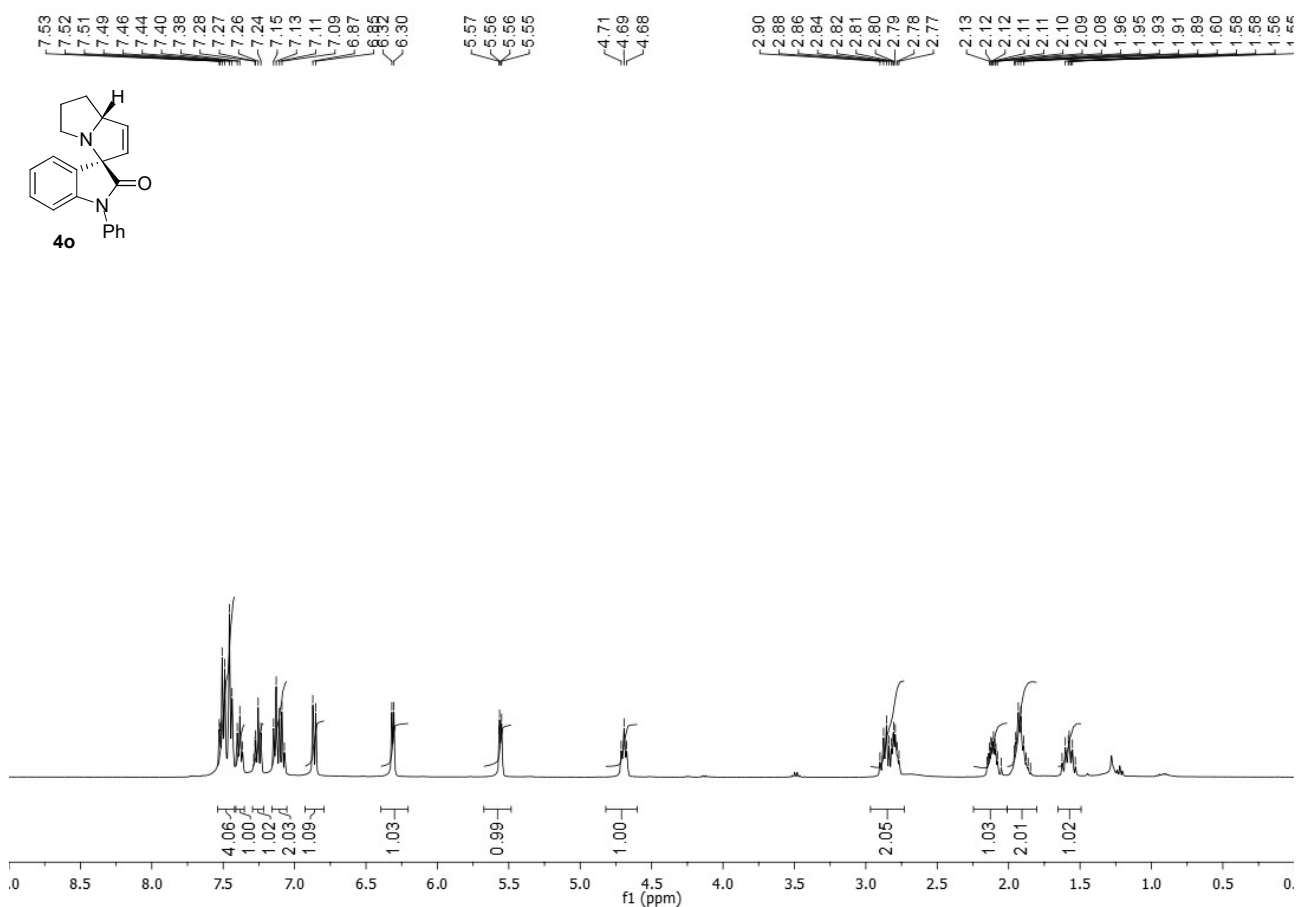

**Figure 38.**  $^{13}\text{C-NMR}$  Spectrum of compound **4o** ( $\text{CDCl}_3$ , 100 MHz)

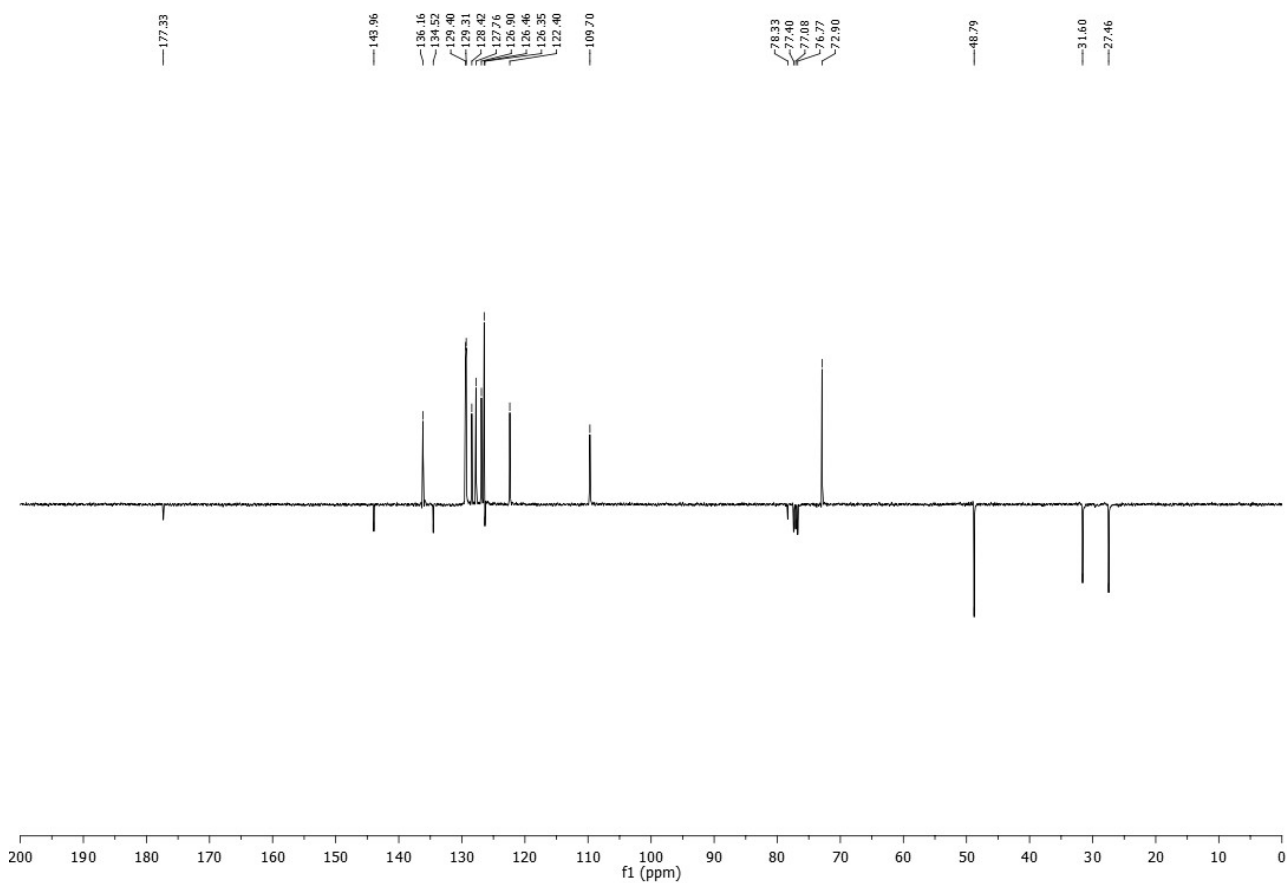

**Figure 39.**  $^1\text{H-NMR}$  Spectrum of compound **4p** ( $\text{CDCl}_3$ , 400 MHz)

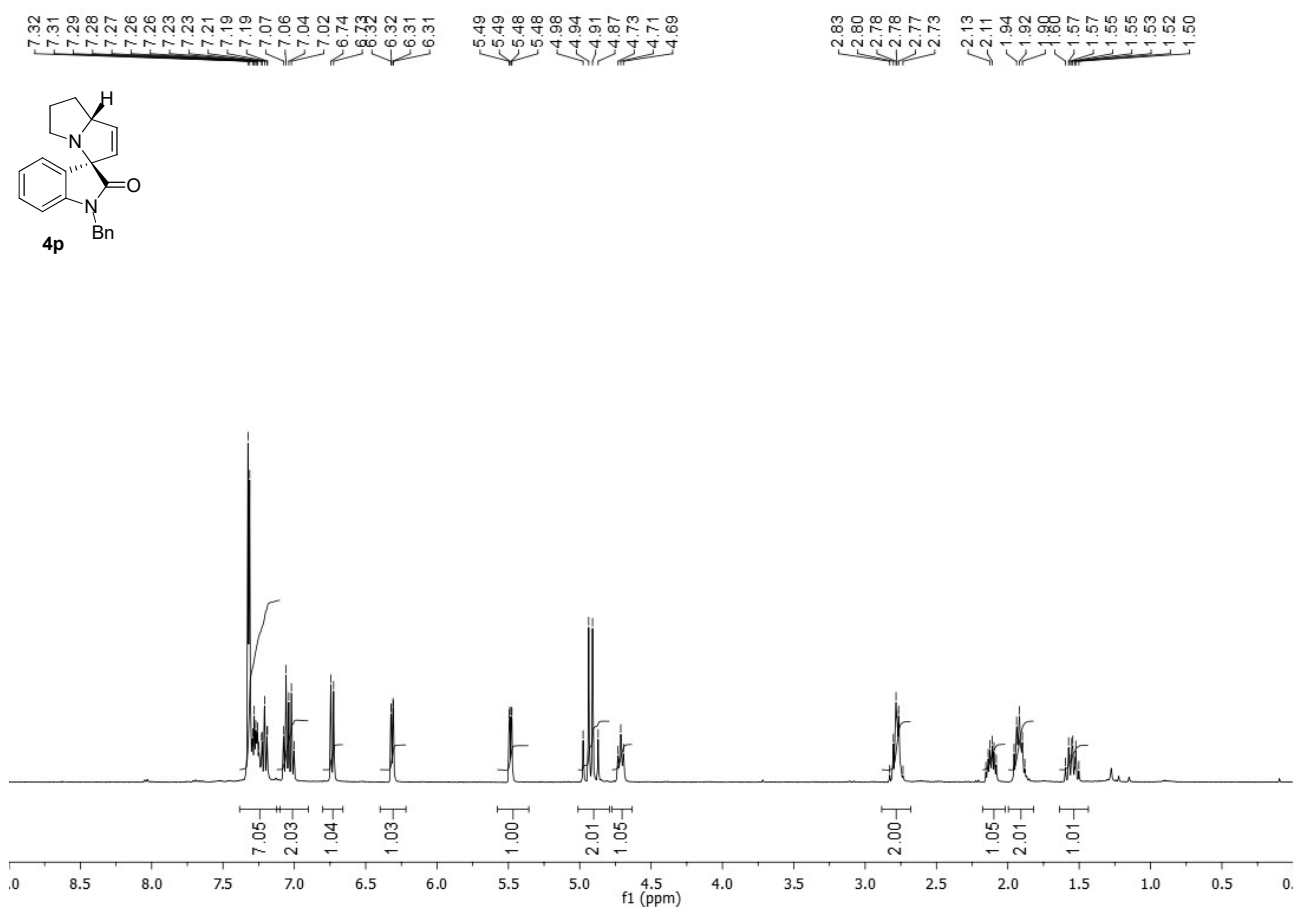

**Figure 40.**  $^{13}\text{C-NMR}$  Spectrum of compound **4p** ( $\text{CDCl}_3$ , 100 MHz)

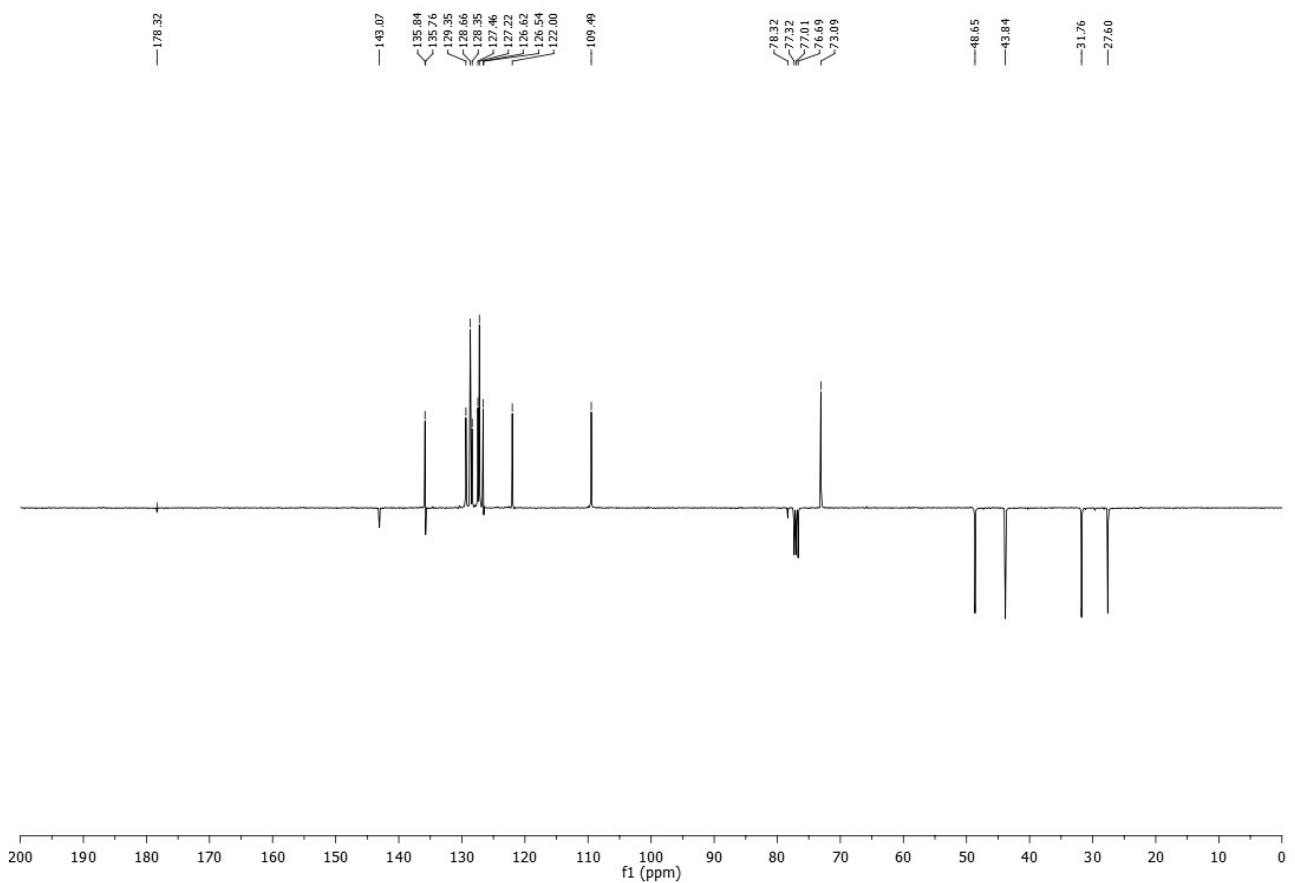

**Figure 41.**  $^1\text{H-NMR}$  Spectrum of compound **4q** ( $\text{CDCl}_3$ , 400 MHz)

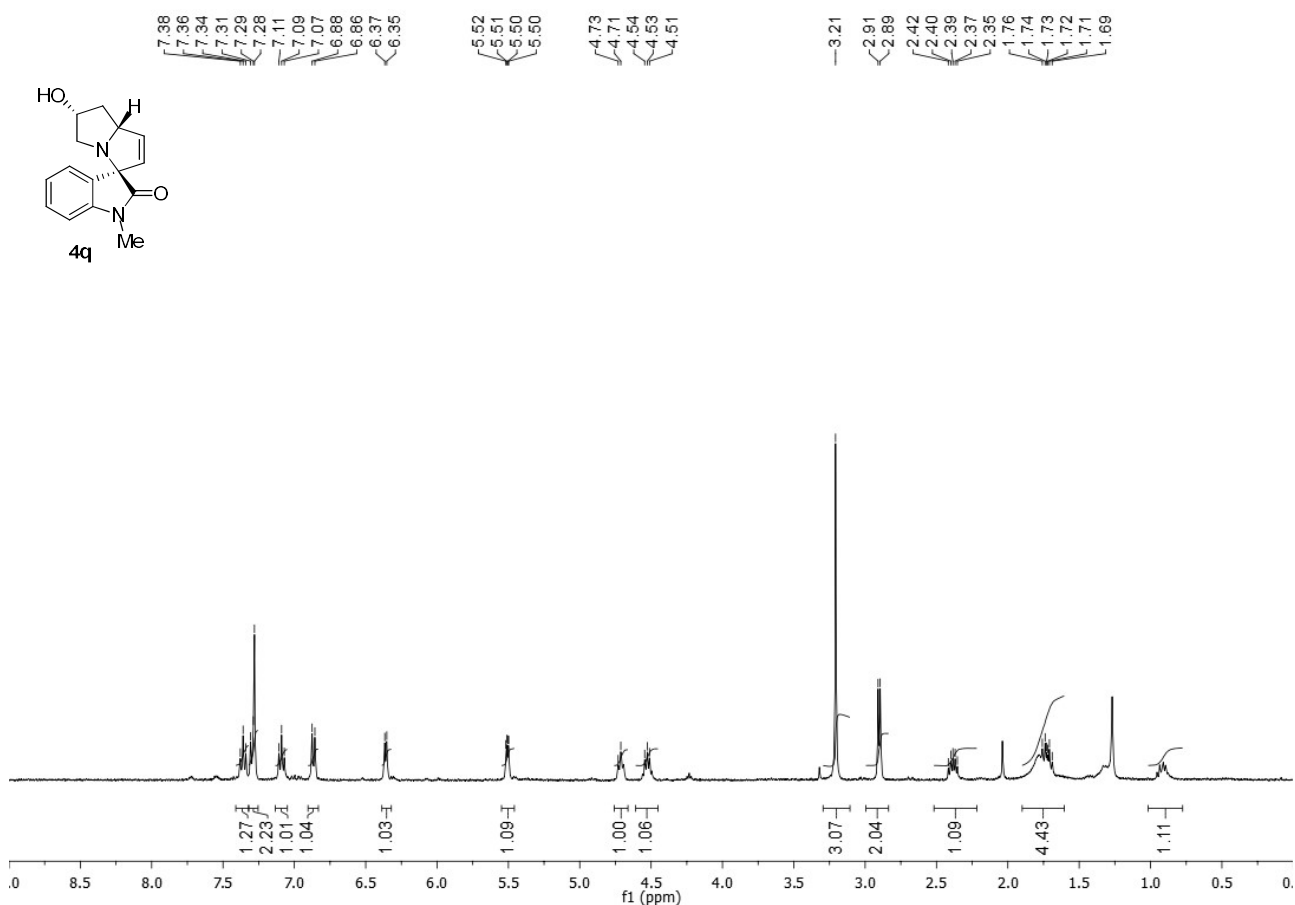

**Figure 42.**  $^{13}\text{C-NMR}$  Spectrum of compound **4q** ( $\text{CDCl}_3$ , 100 MHz)

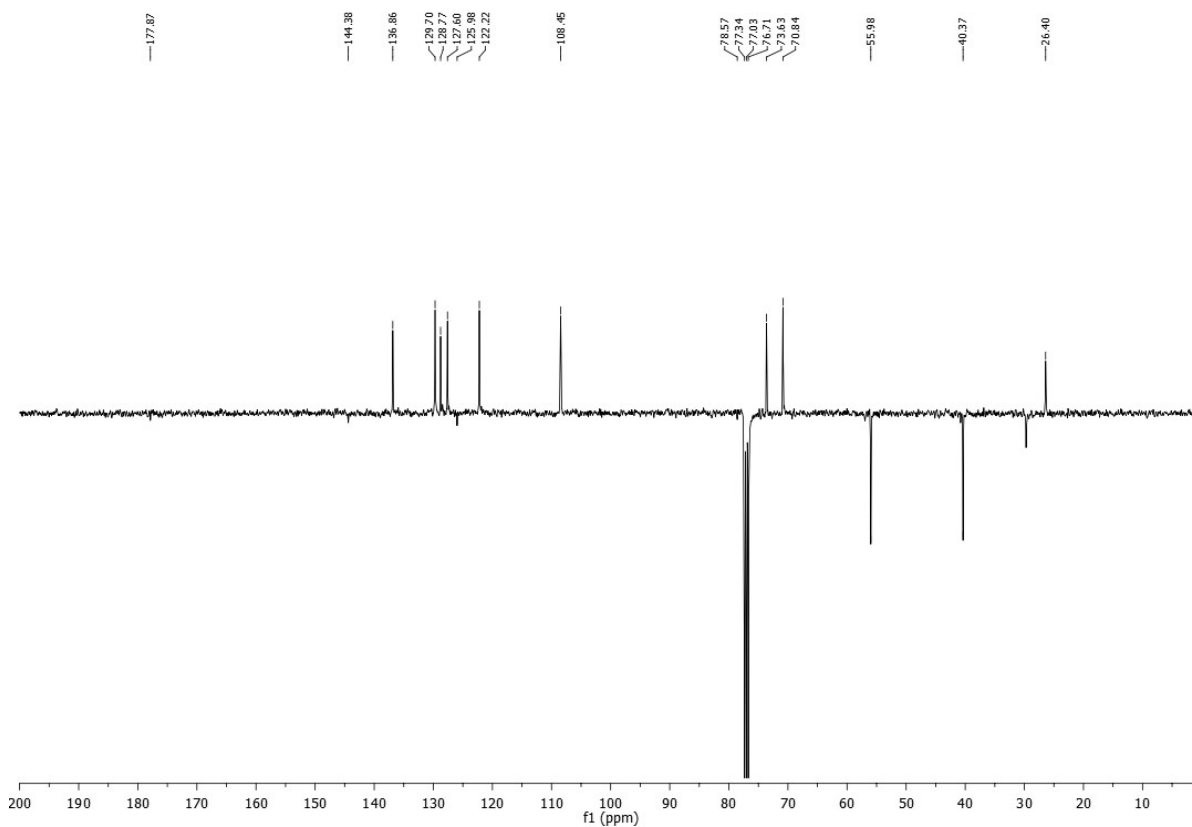

**Figure 43.** NOESY experiment of compound **4q**

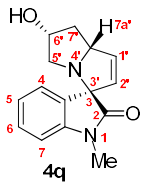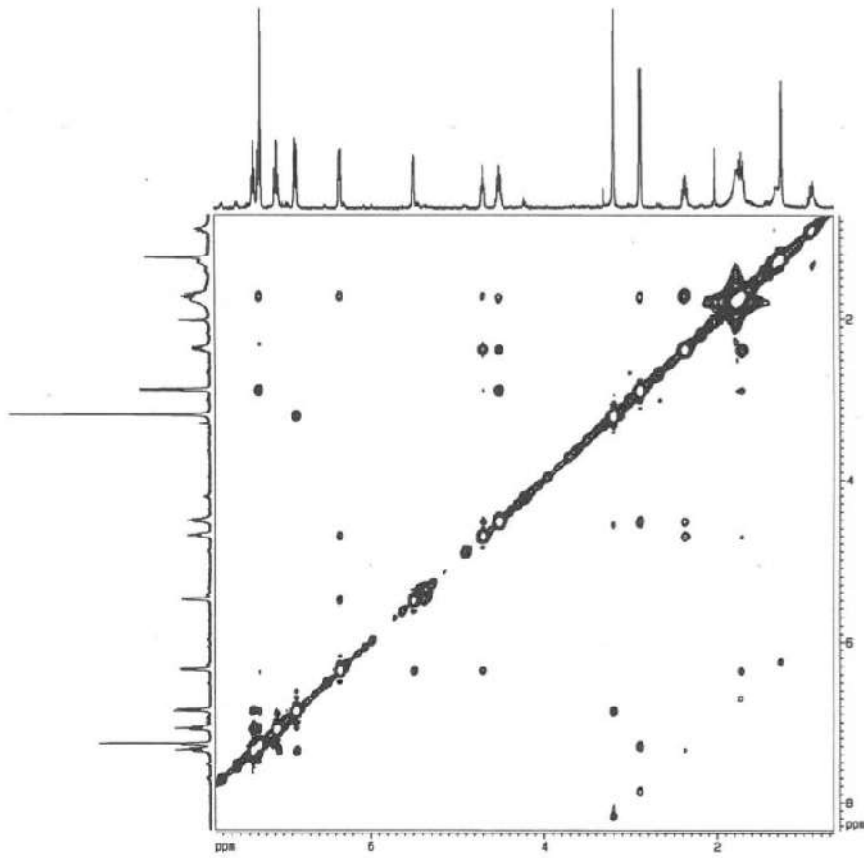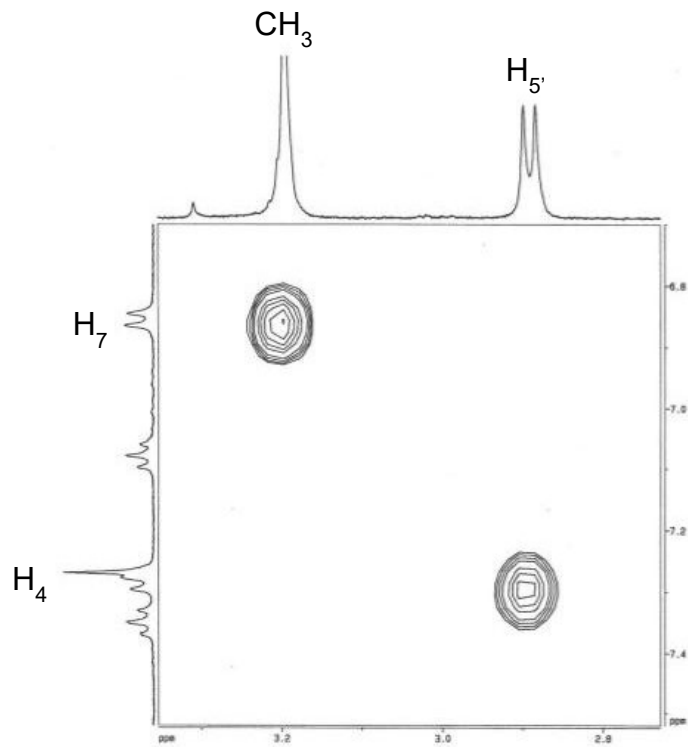



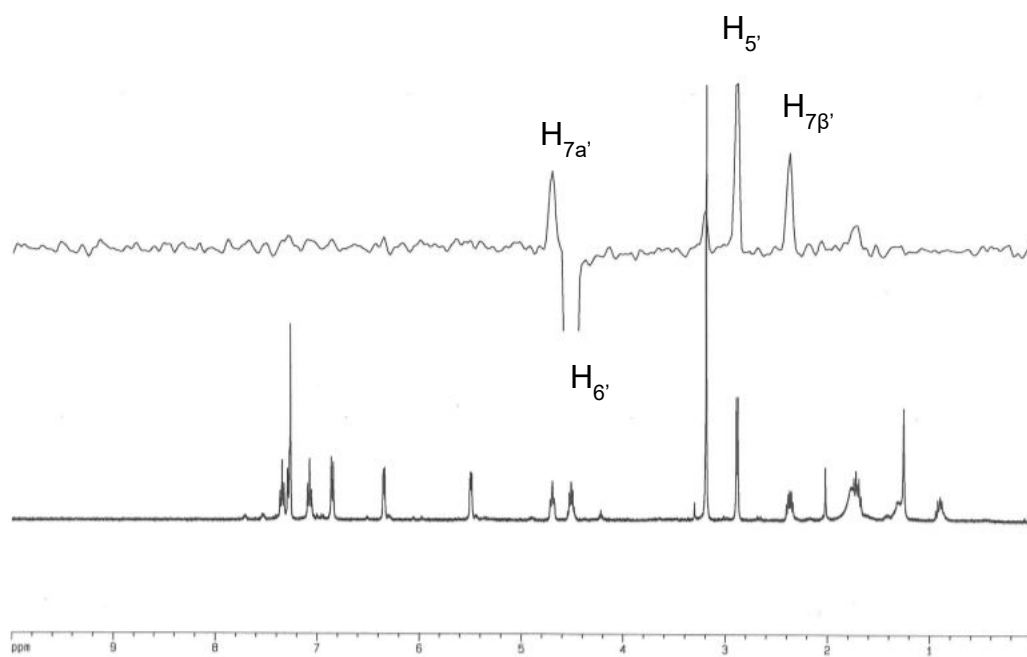

**Figure 44.**  $^1\text{H-NMR}$  Spectrum of compound **4q'** ( $\text{CDCl}_3$ , 400 MHz)

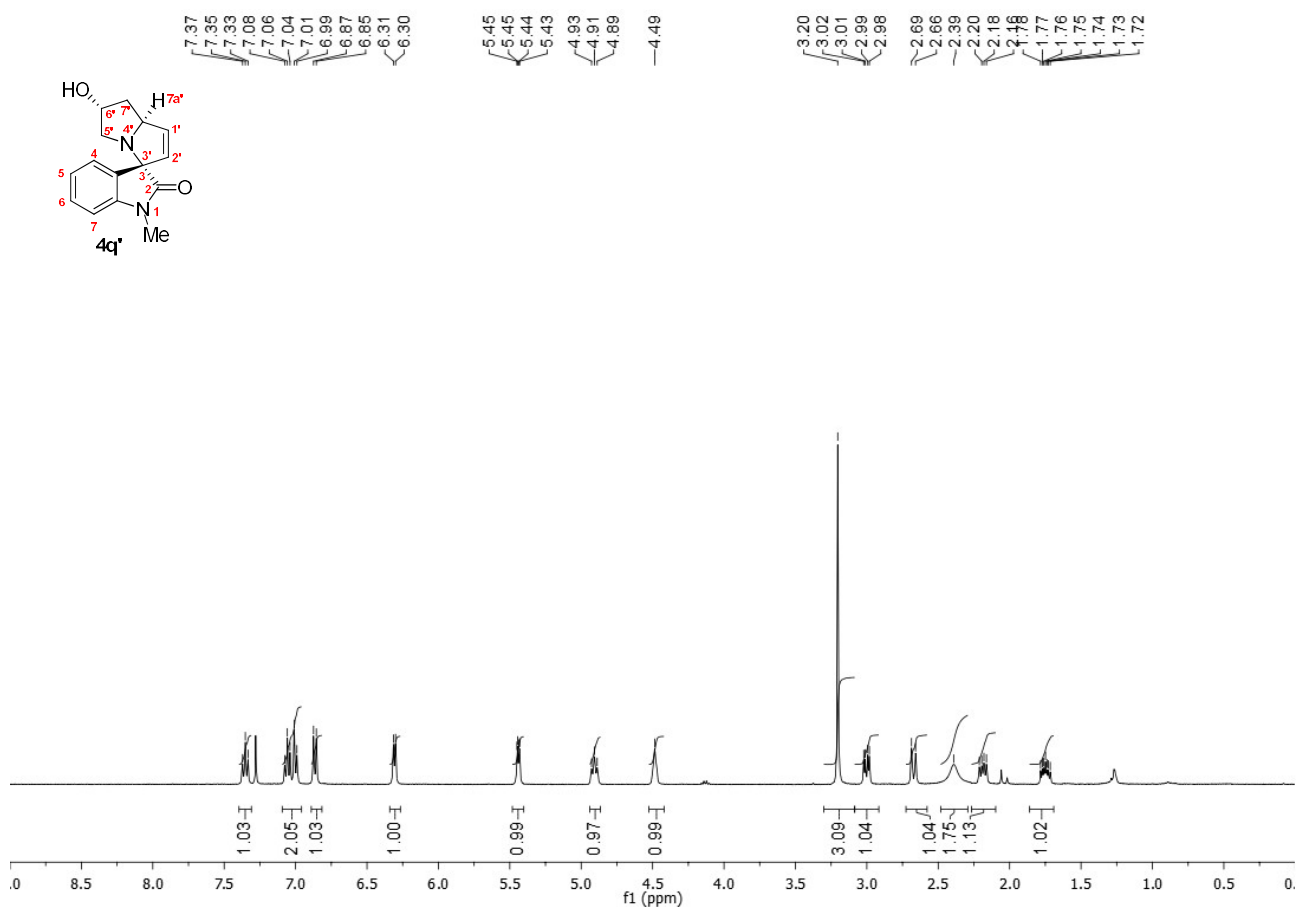

**Figure 45.**  $^{13}\text{C-NMR}$  Spectrum of compound **4q'** ( $\text{CDCl}_3$ , 100 MHz)

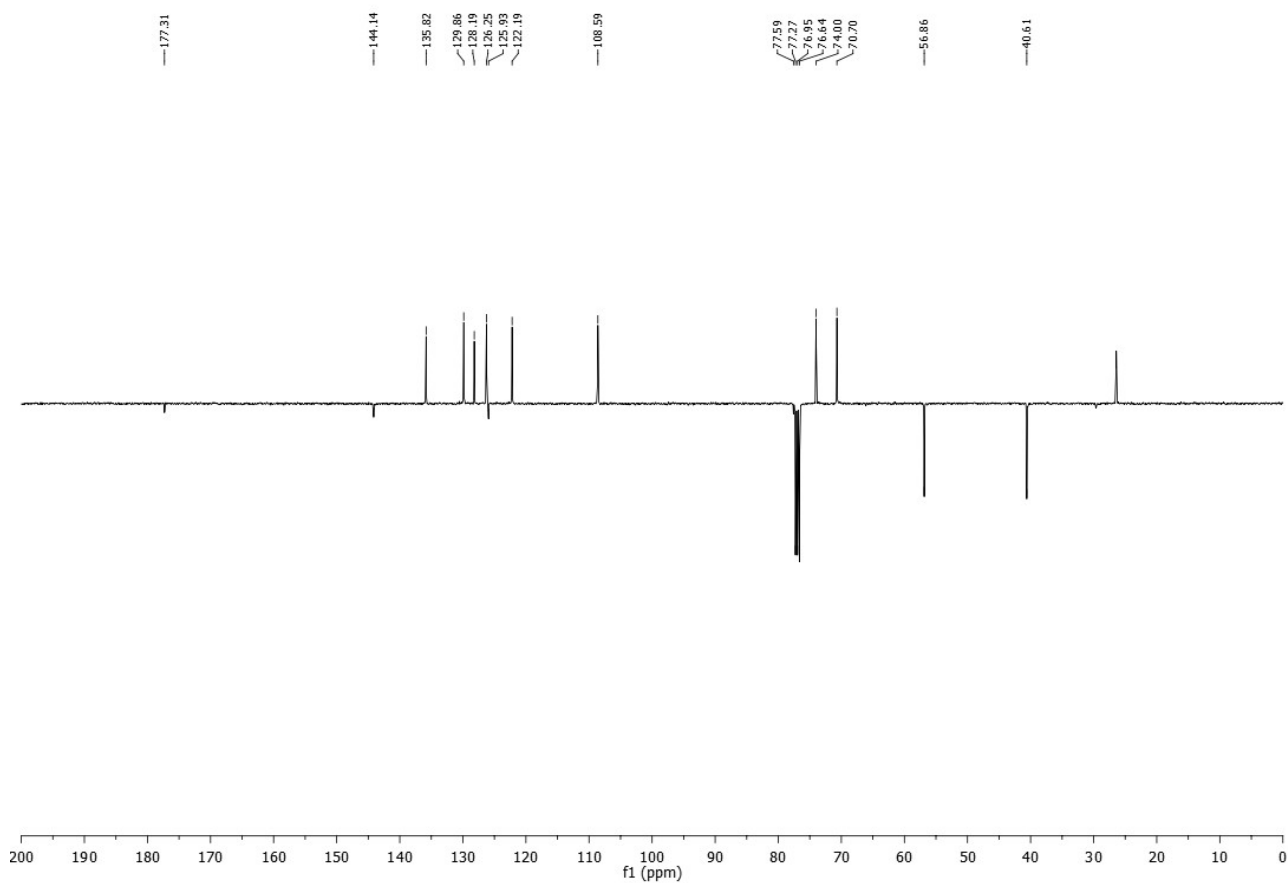

Figure 46. NOESY experiment compound 4q'

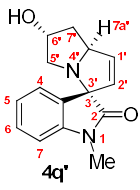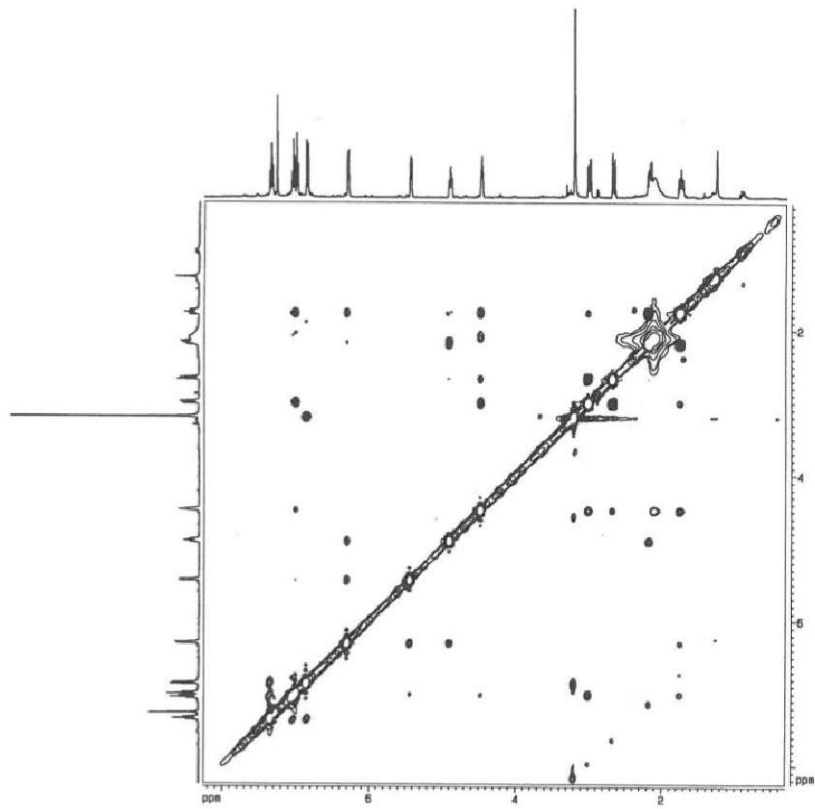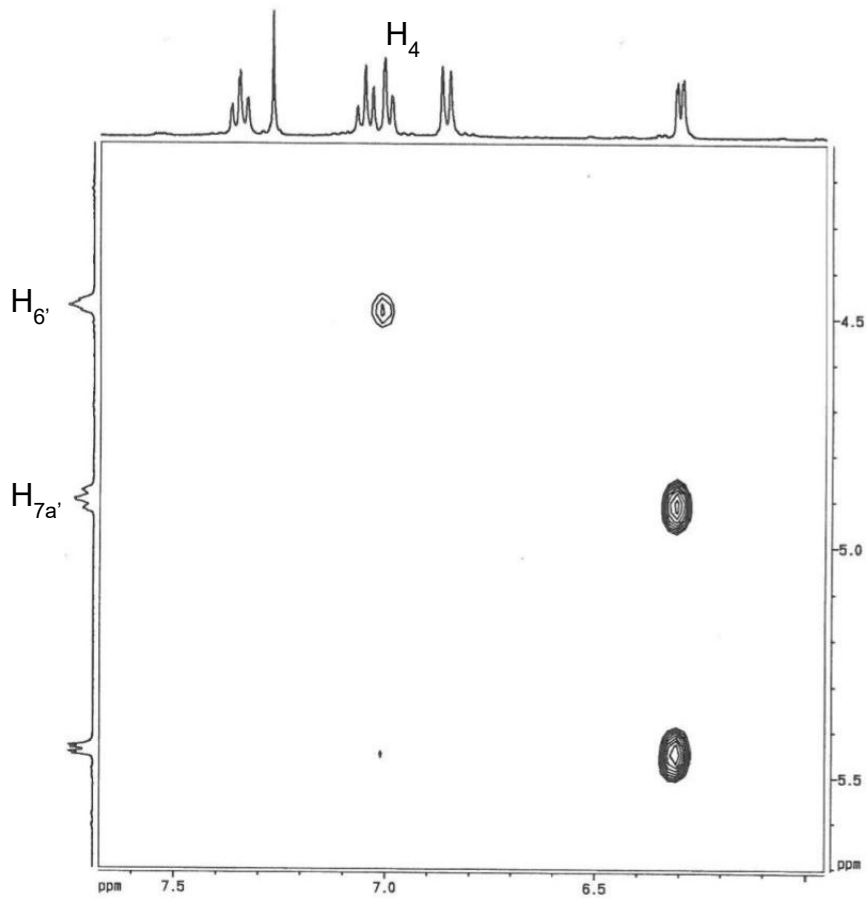

**Figure 47.**  $^1\text{H-NMR}$  Spectrum of compound **4r** ( $\text{CDCl}_3$ , 400 MHz)

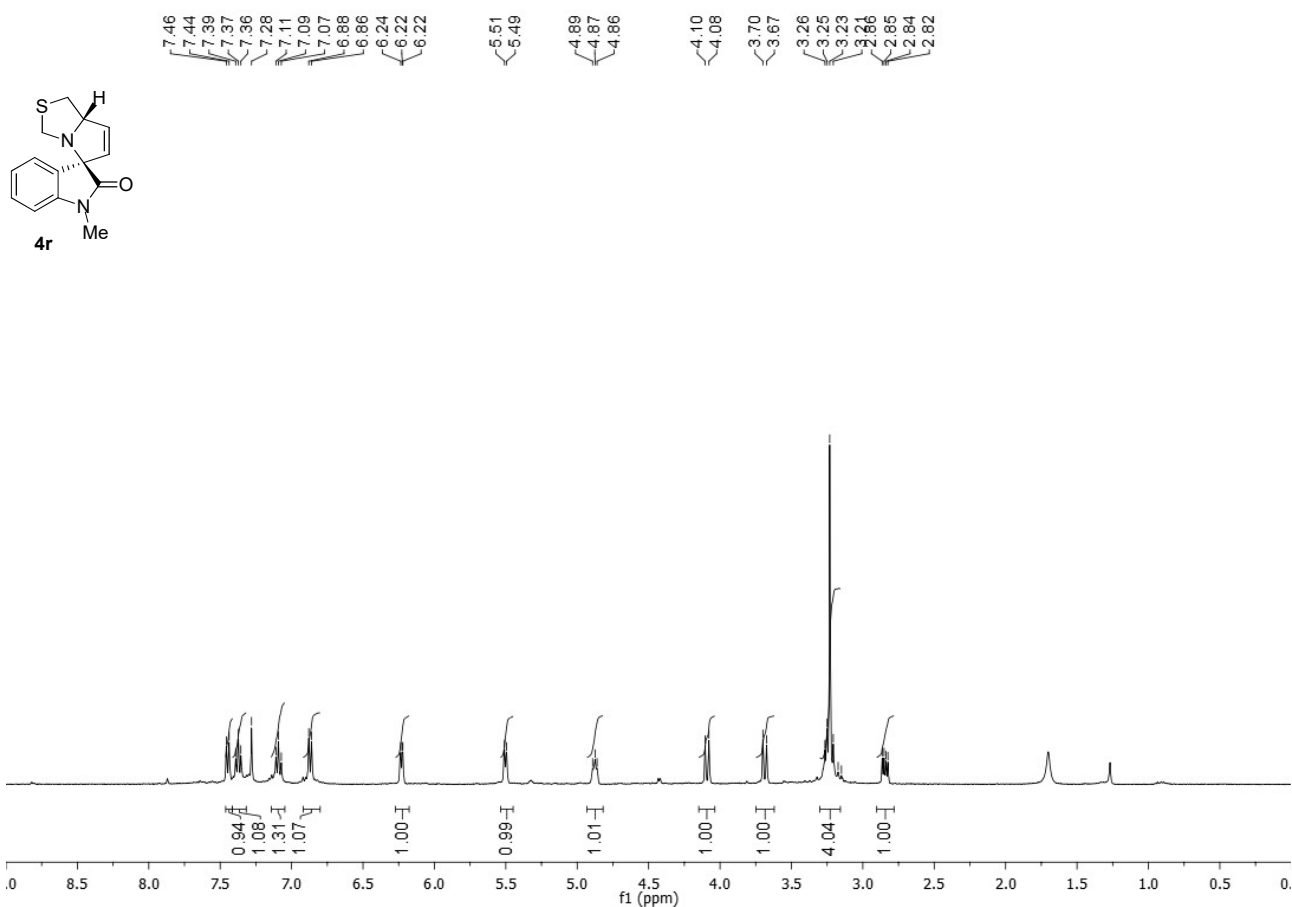

**Figure 48.**  $^{13}\text{C-NMR}$  Spectrum of compound **4r** ( $\text{CDCl}_3$ , 100 MHz)

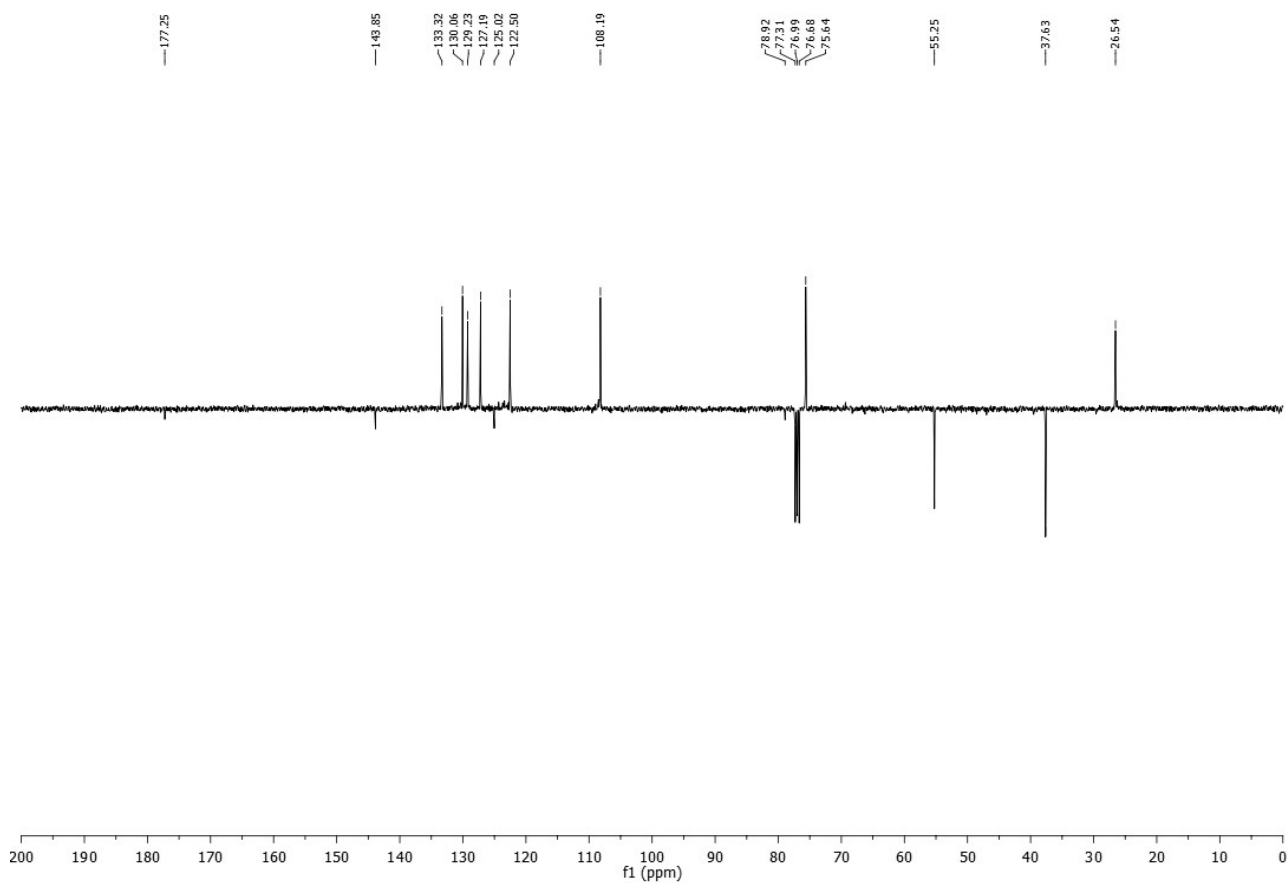

**Figure 49.**  $^1\text{H-NMR}$  Spectrum of compound **4s** ( $\text{CDCl}_3$ , 400 MHz)

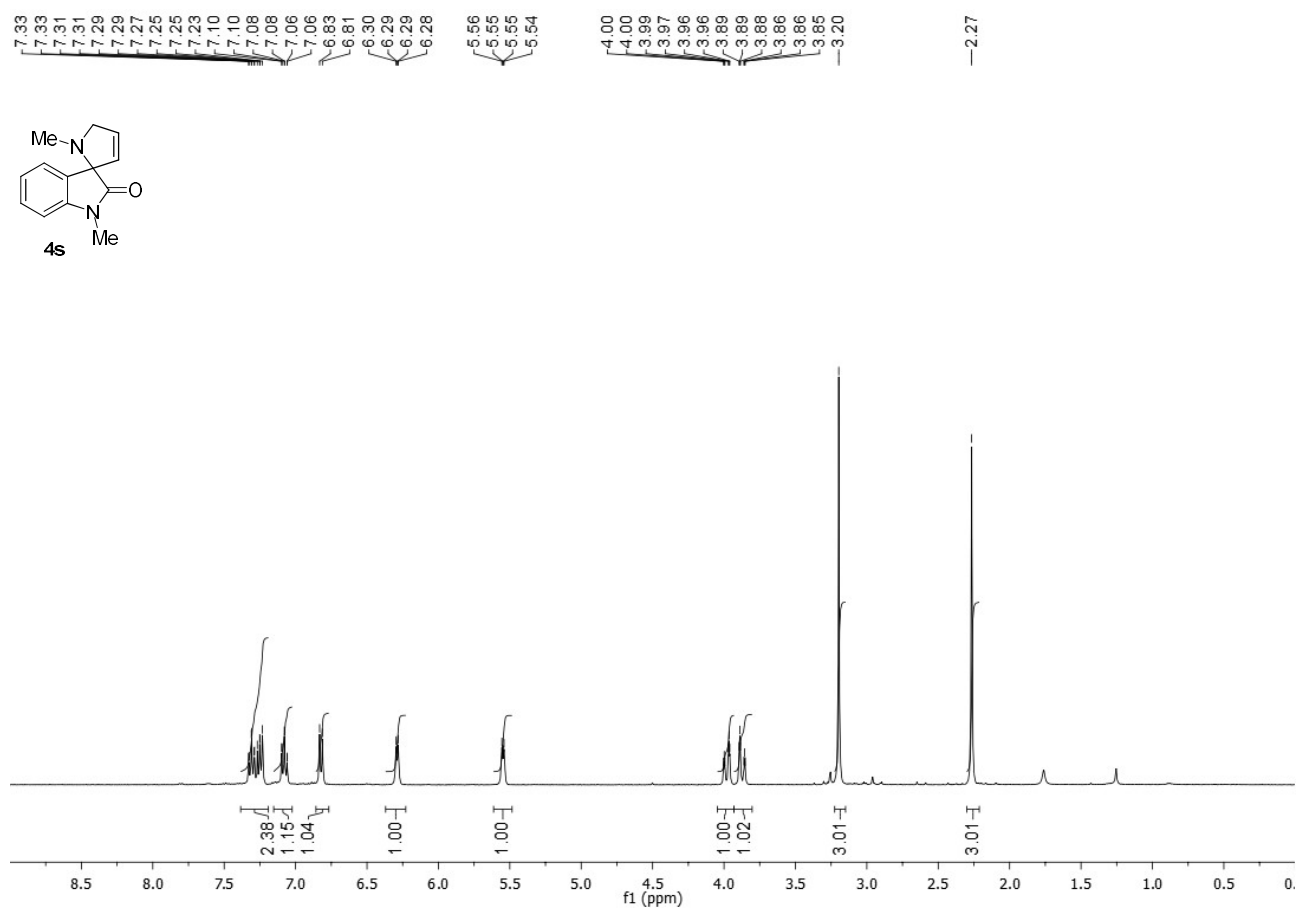

**Figure 50.**  $^{13}\text{C-NMR}$  Spectrum of compound **4t** ( $\text{CDCl}_3$ , 100 MHz)

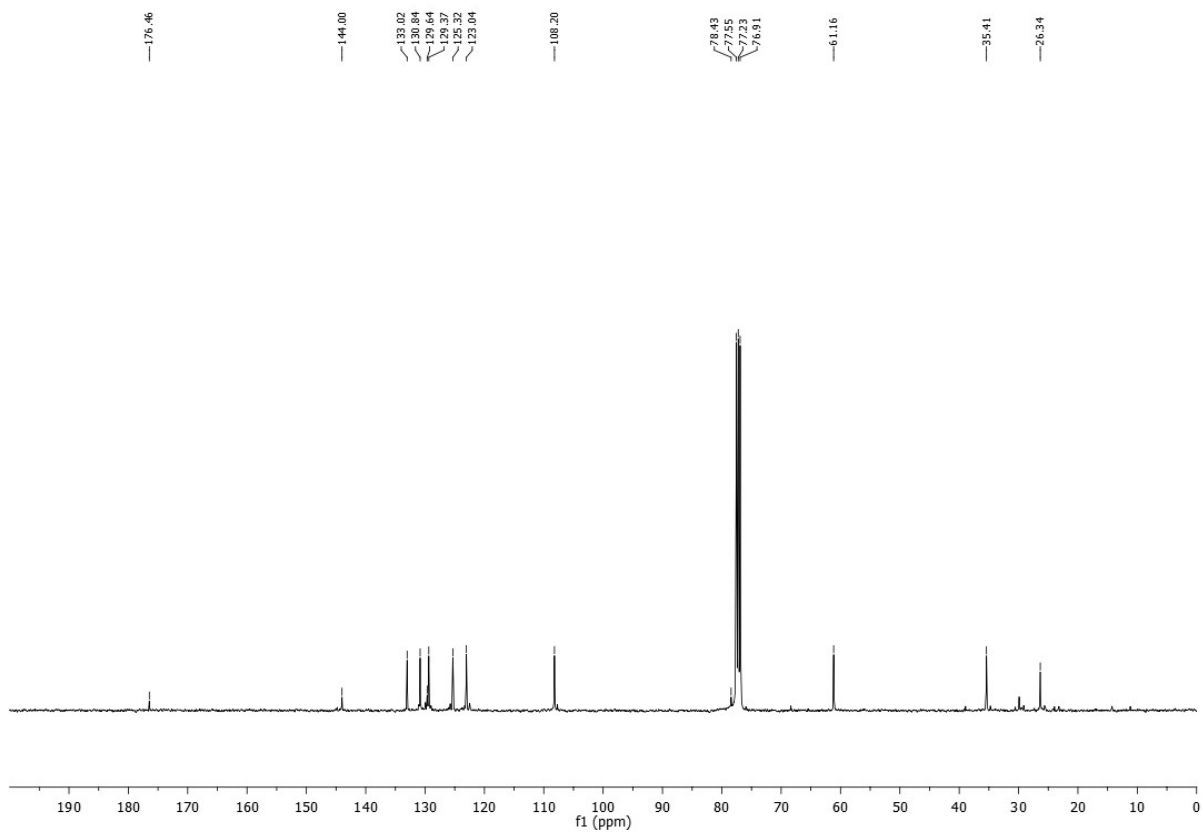

**Figure 51.**  $^1\text{H-NMR}$  Spectrum of compound **10a** ( $\text{CDCl}_3$ , 400 MHz)<sup>[3]</sup>

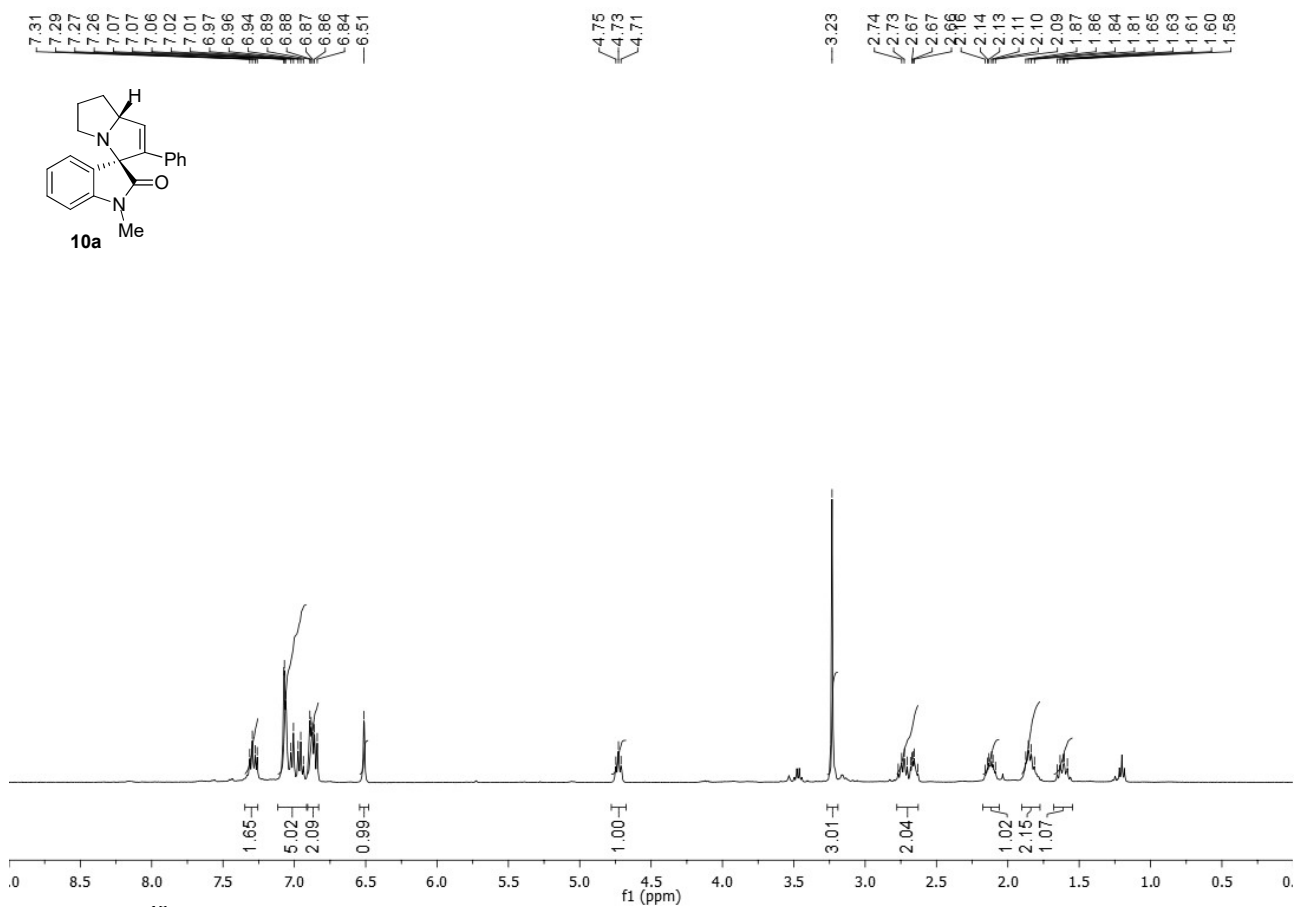

**Figure 51.**  $^{13}\text{C-NMR}$  Spectrum of compound **10a** ( $\text{CDCl}_3$ , 100 MHz)

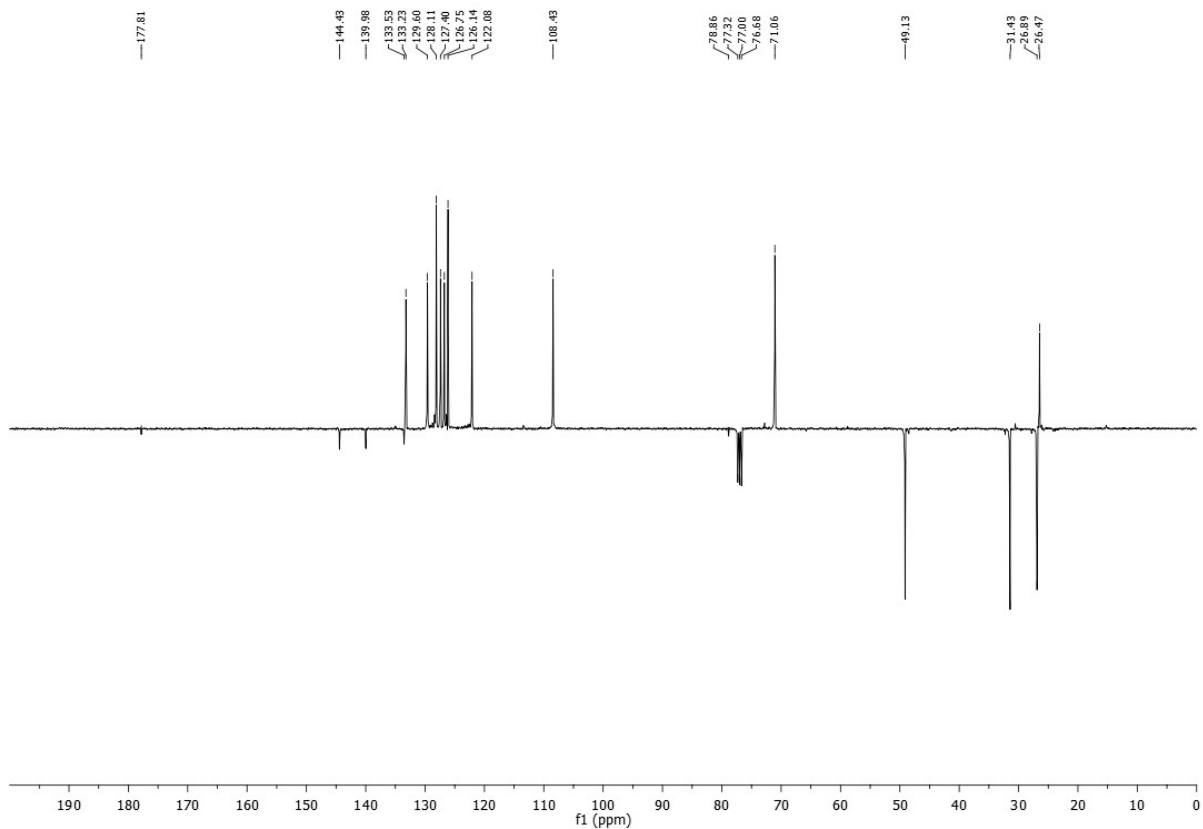

**Figure 52.**  $^1\text{H-NMR}$  Spectrum of compound **10b** ( $\text{CDCl}_3$ , 400 MHz)

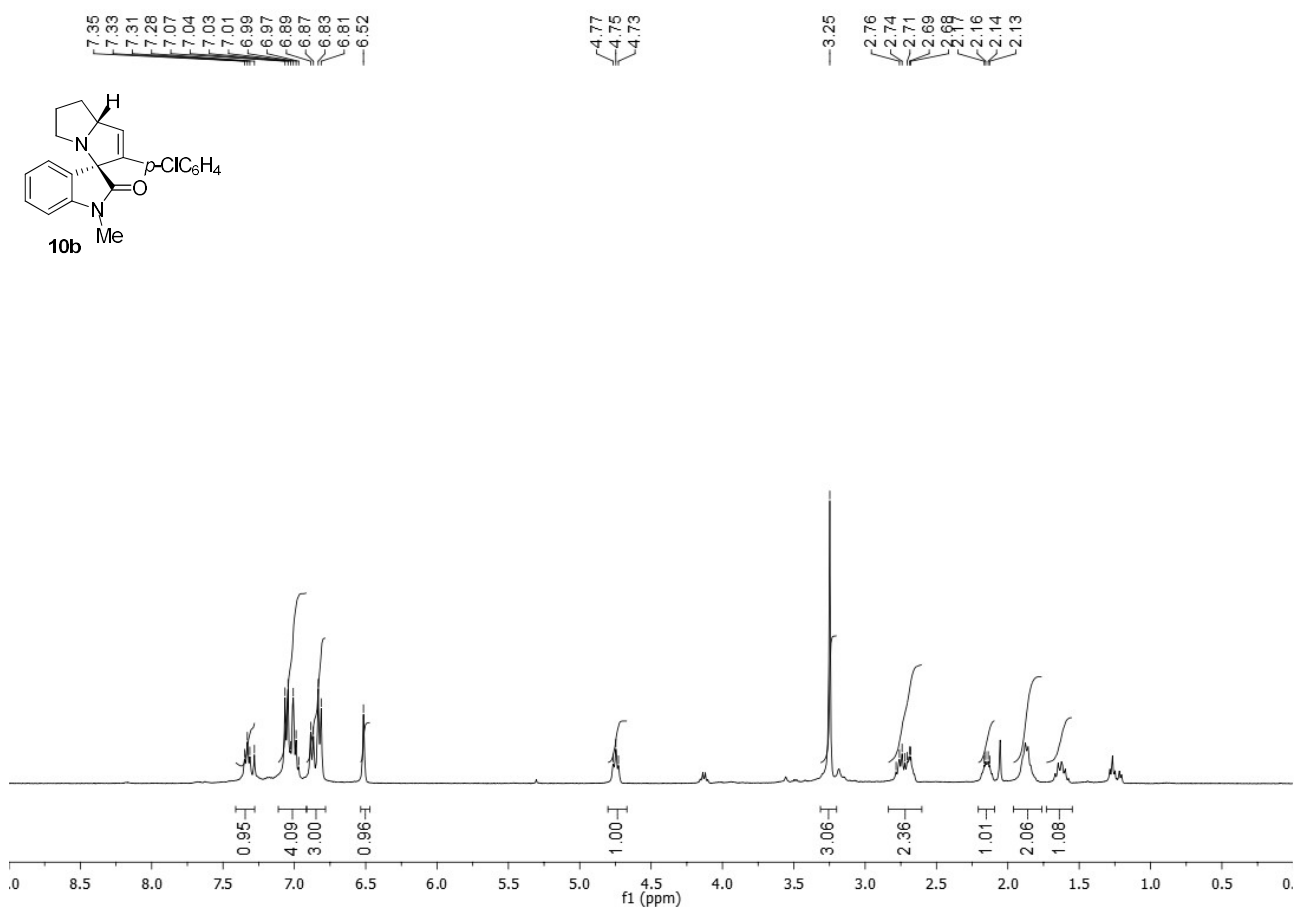

**Figure 53.**  $^{13}\text{C-NMR}$  Spectrum of compound **10b** ( $\text{CDCl}_3$ , 100 MHz)

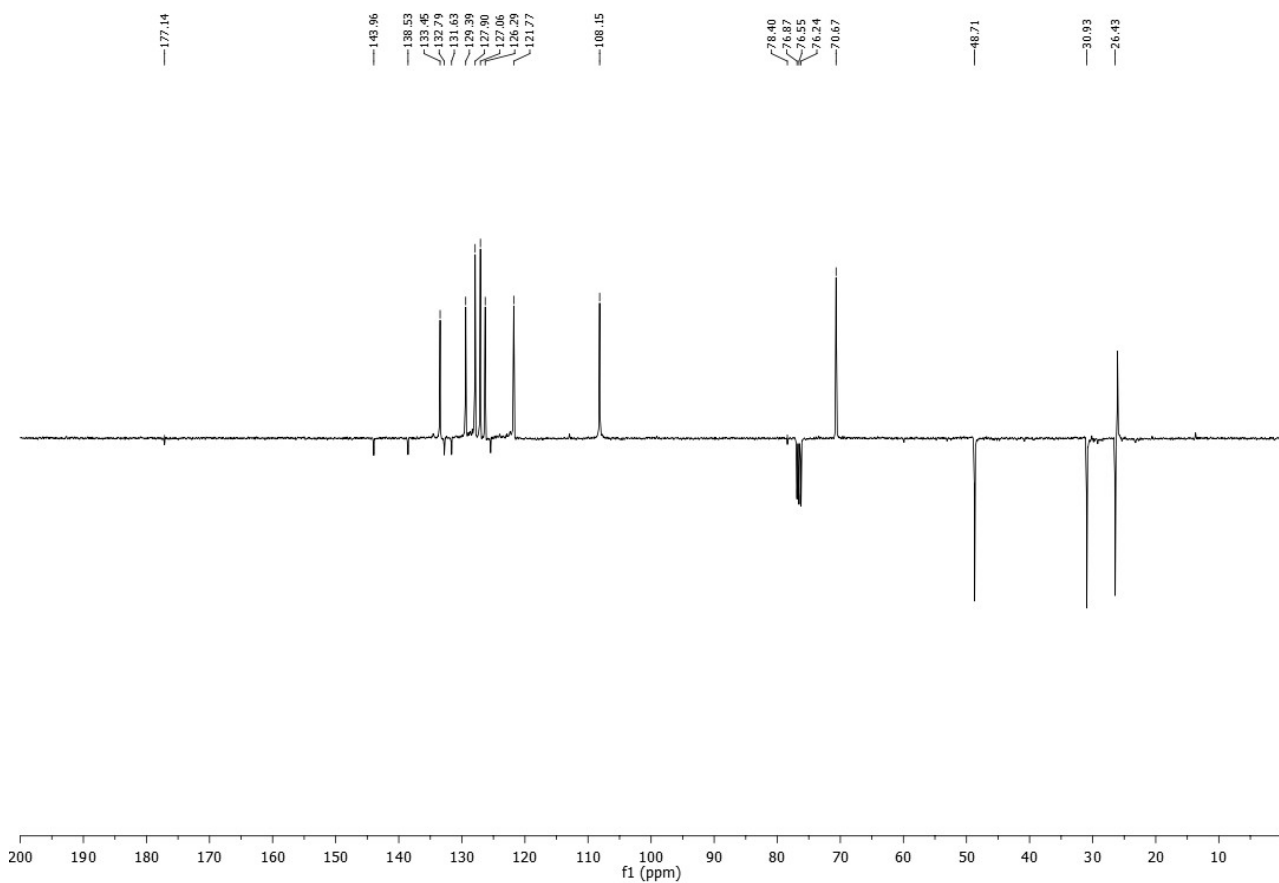

Figure 54. NOESY experiment for compound 10b

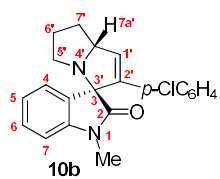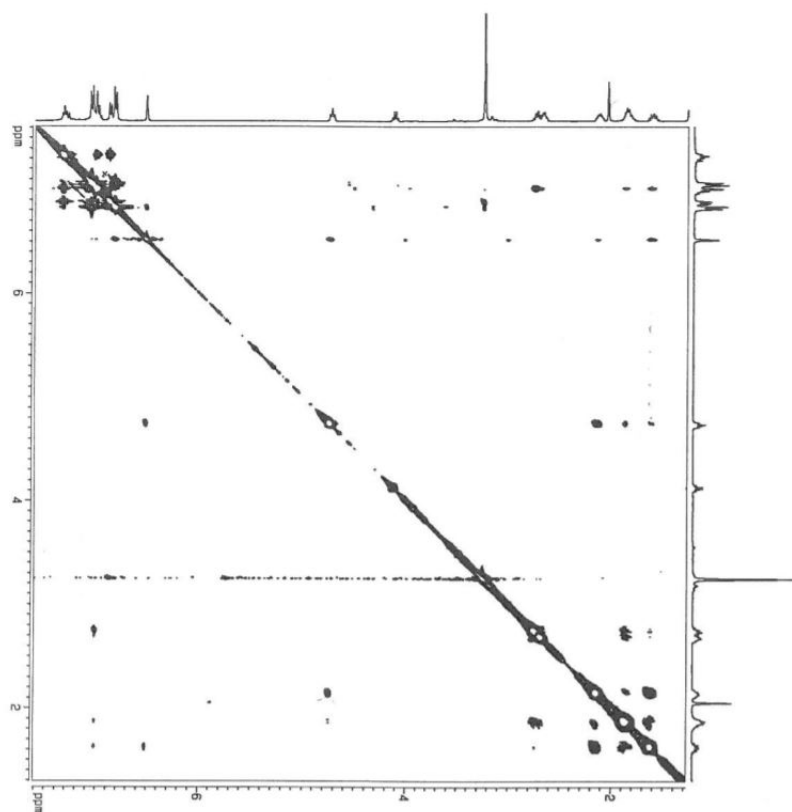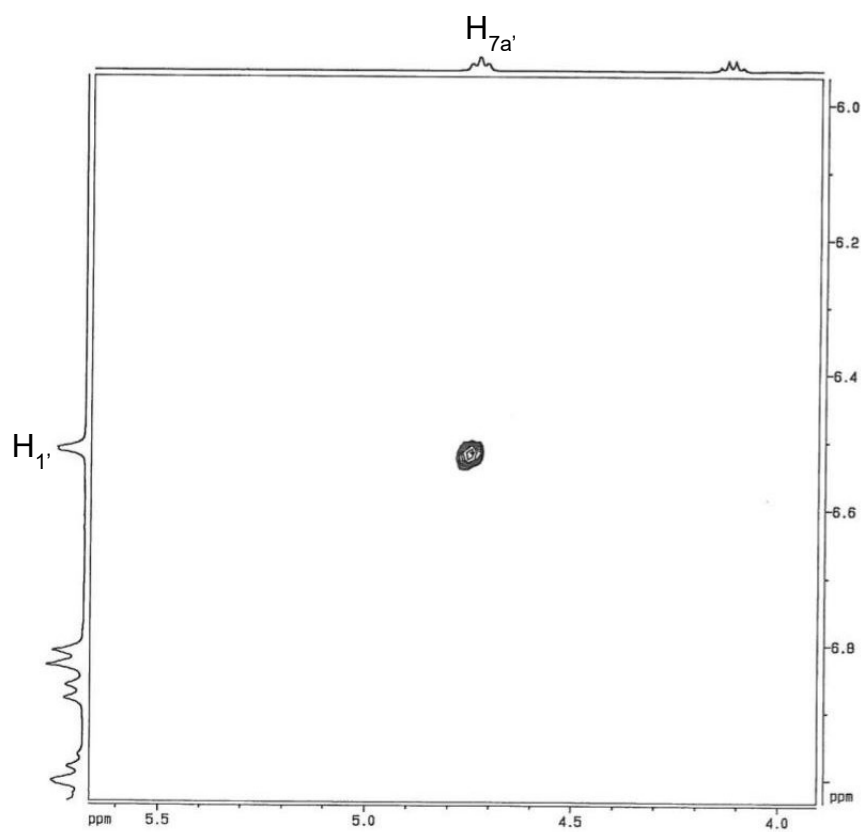



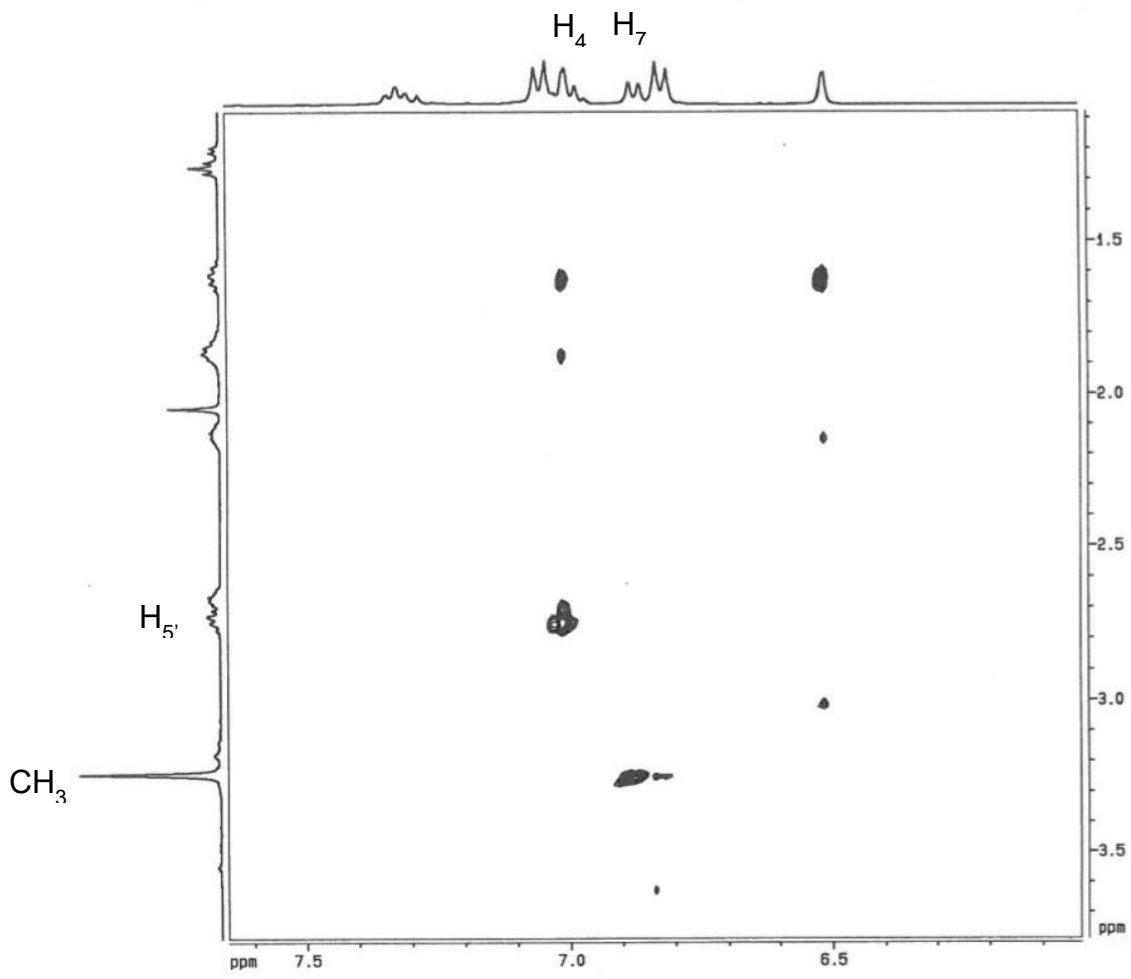

**Figure 55.**  $^1\text{H-NMR}$  Spectrum of compound **10c** ( $\text{CDCl}_3$ , 400 MHz)

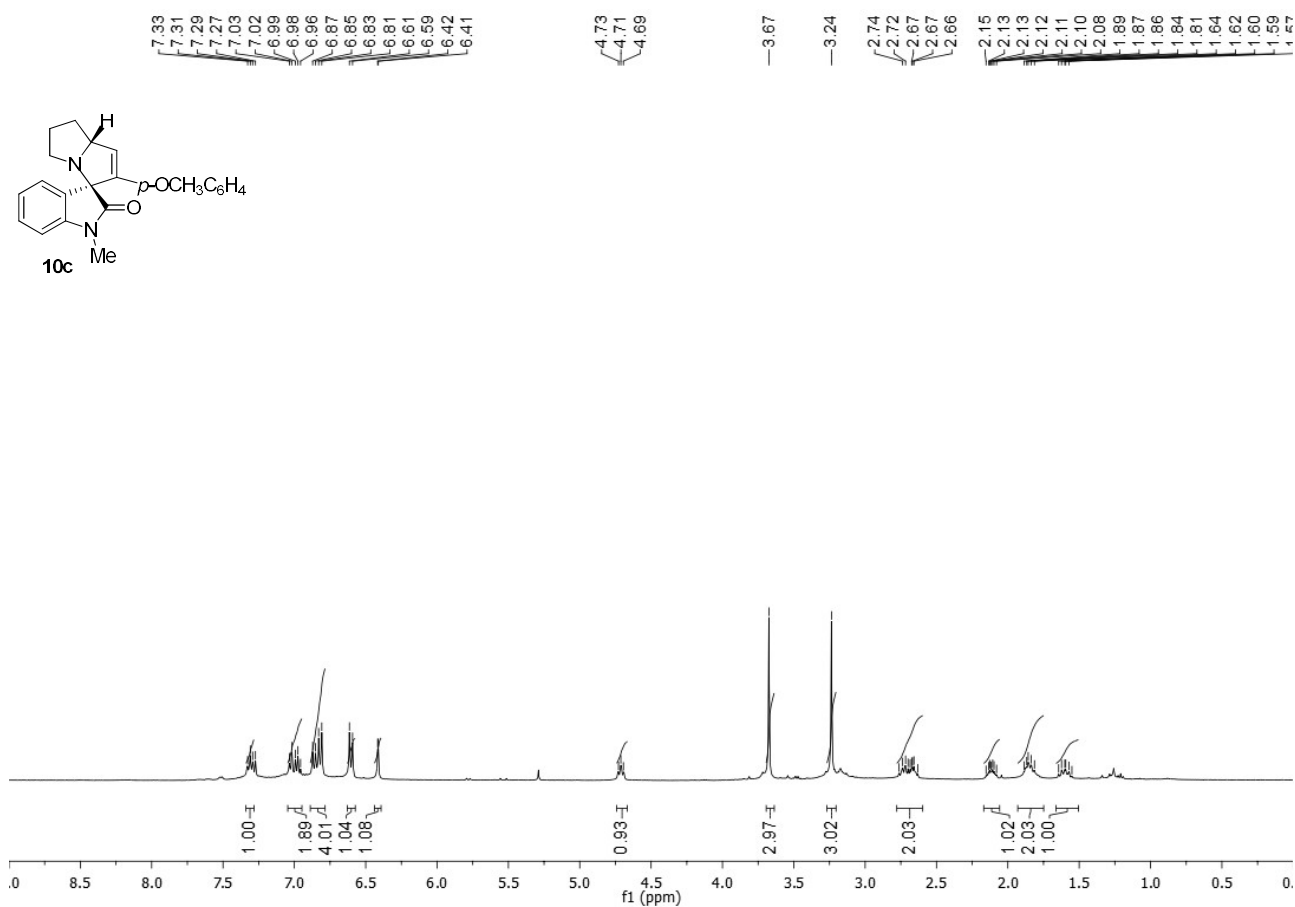

**Figure 56.**  $^{13}\text{C-NMR}$  Spectrum of compound **10c** ( $\text{CDCl}_3$ , 100 MHz)

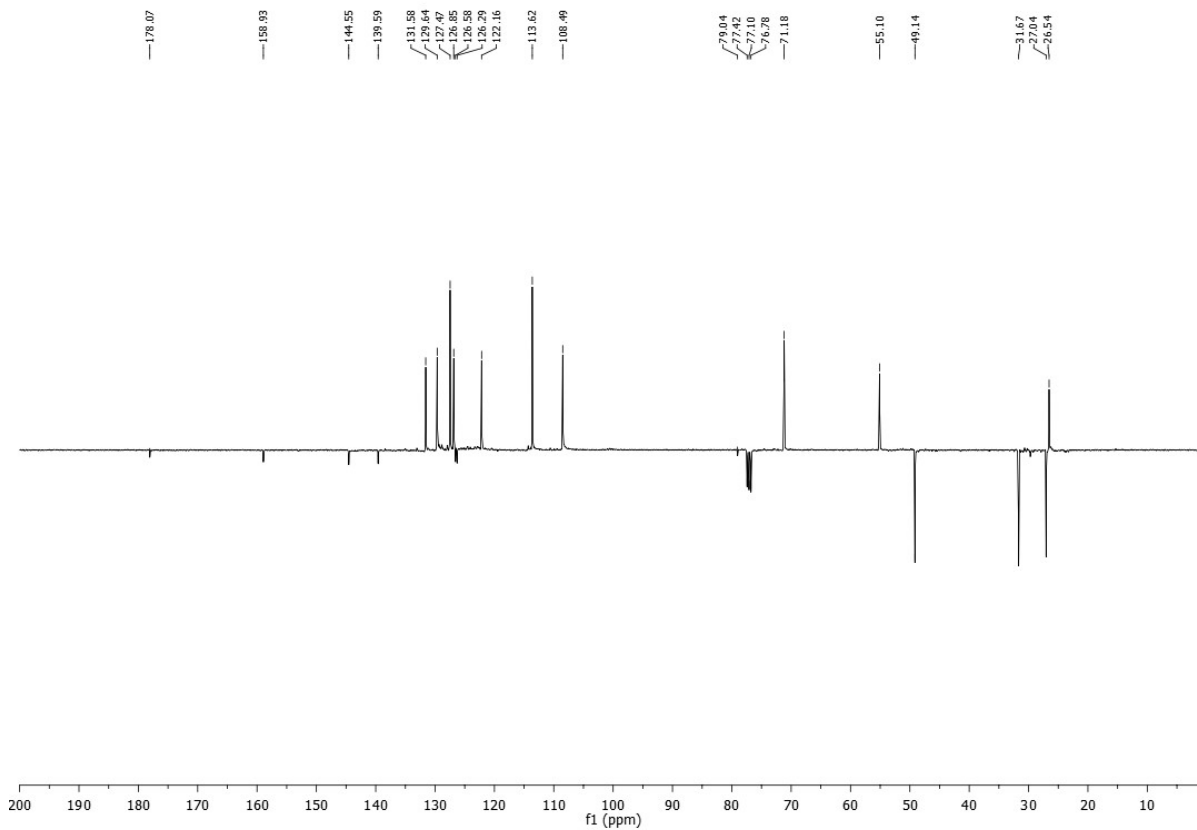

**Figure 57.**  $^1\text{H-NMR}$  Spectrum of compound **10d** ( $\text{CDCl}_3$ , 400 MHz)

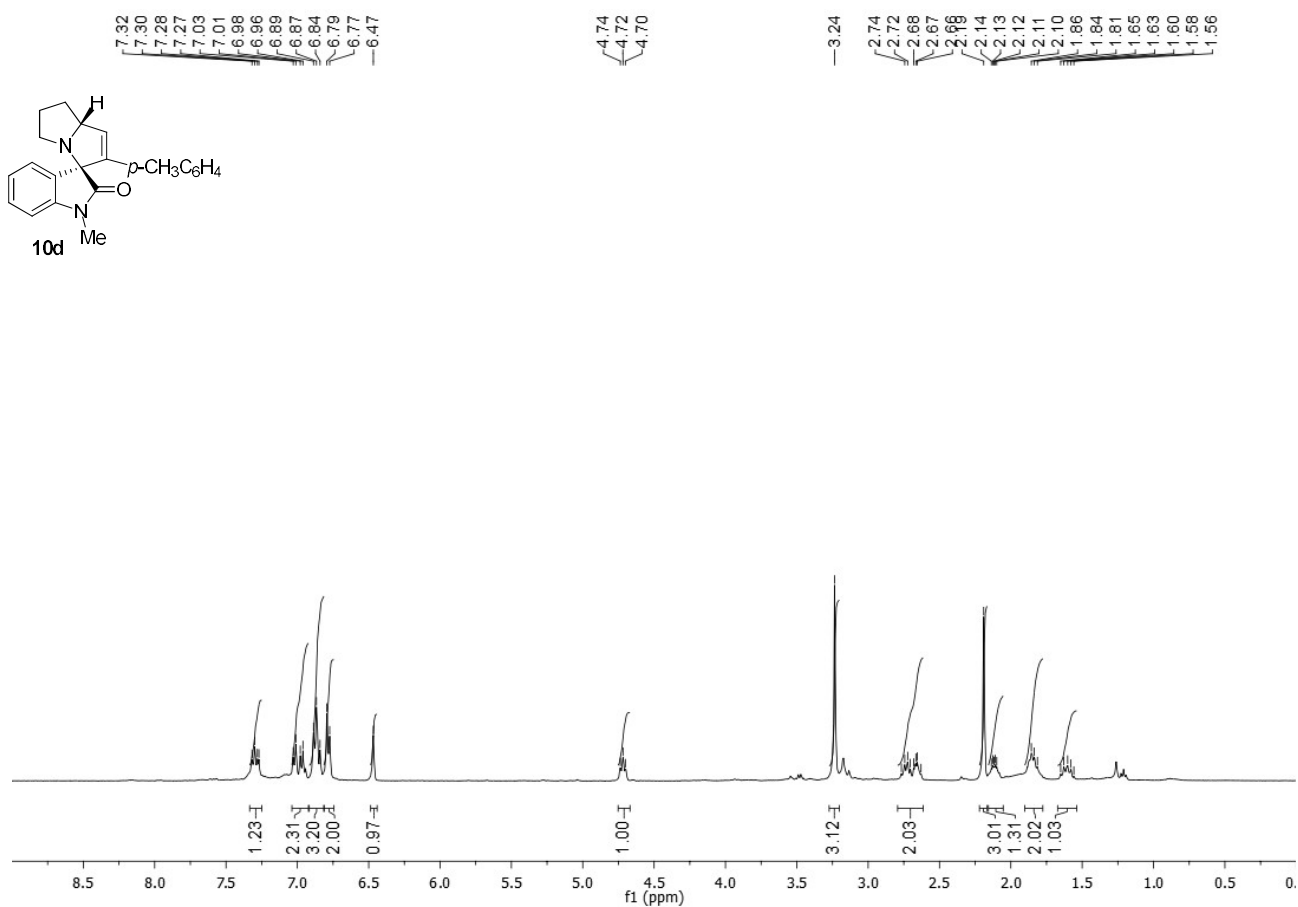

**Figure 58.**  $^{13}\text{C-NMR}$  Spectrum of compound **10d** ( $\text{CDCl}_3$ , 400 MHz)

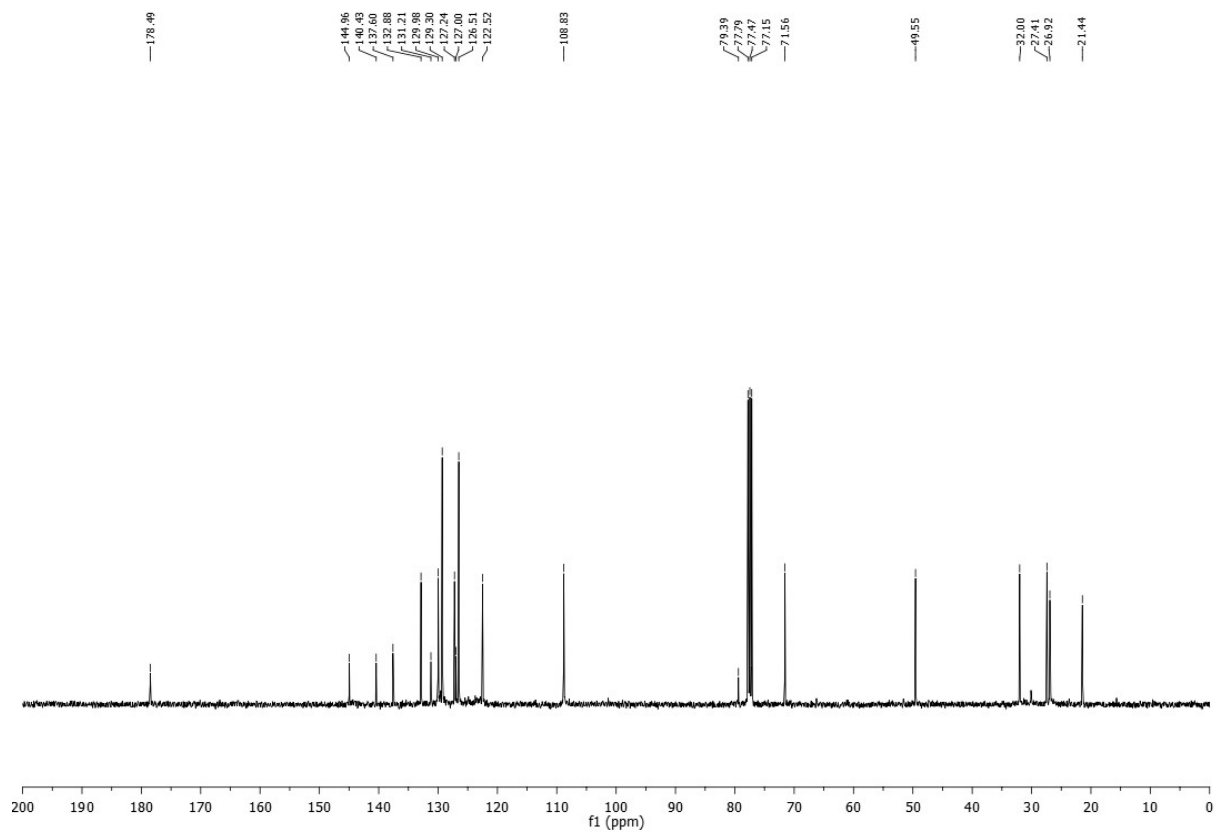

Figure 59. <sup>1</sup>H-NMR Spectrum of compound 10e and 11e from 1f (CDCl<sub>3</sub>, 400 MHz)

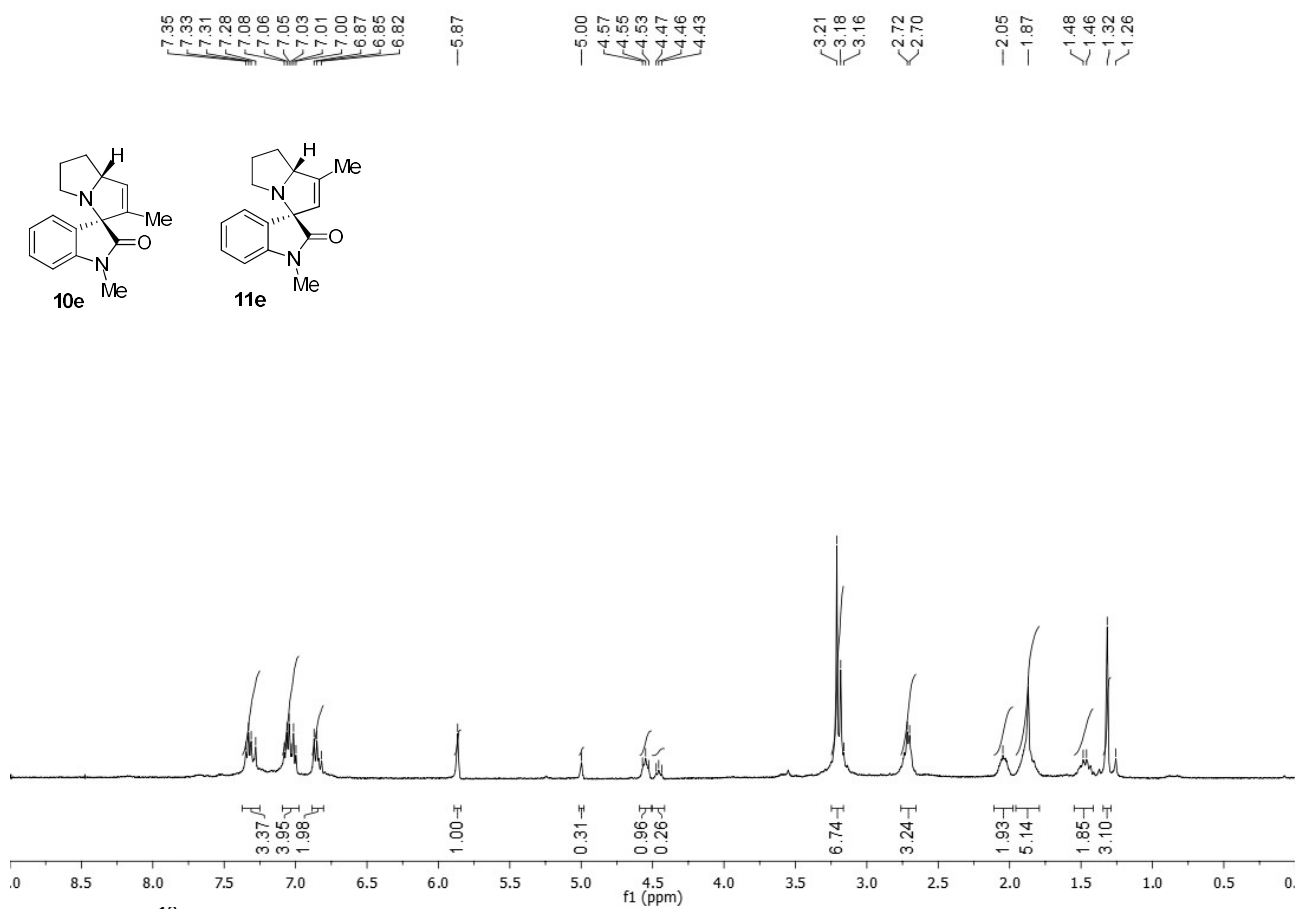

Figure 60. <sup>13</sup>C-NMR Spectrum of compound 10e and 11e from 1f (CDCl<sub>3</sub>, 100 MHz)

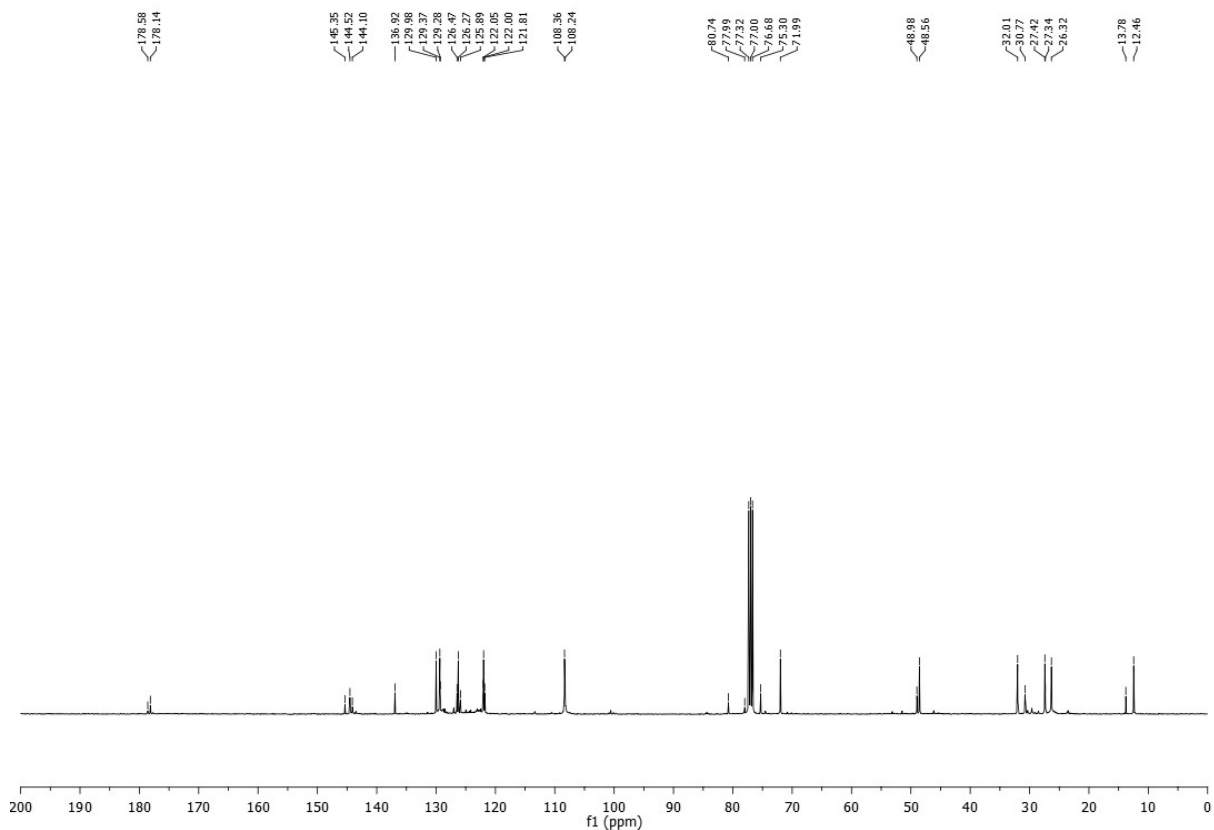

**Figure 61.** NOESY experiment for compounds **10e** and **11e** from **1f**

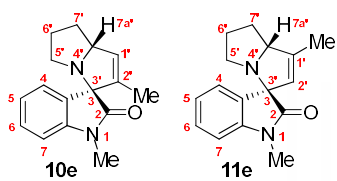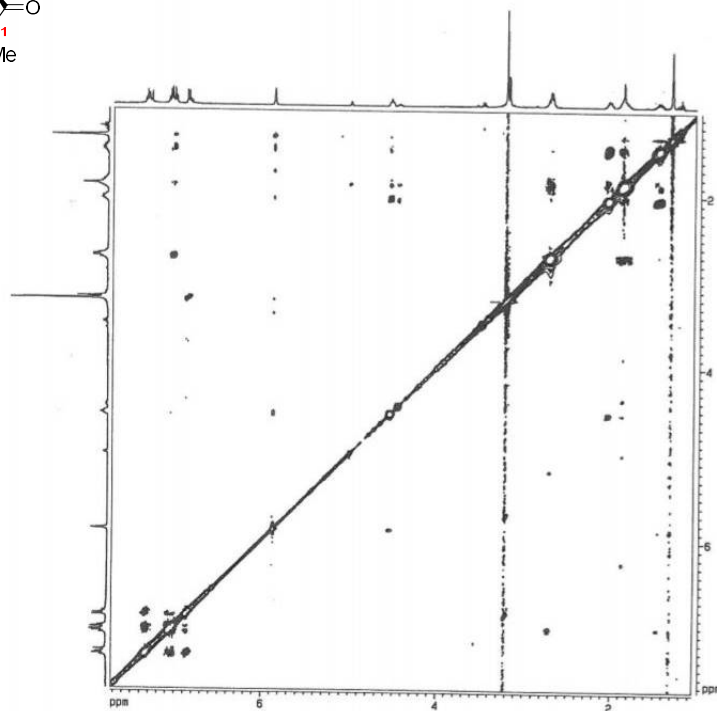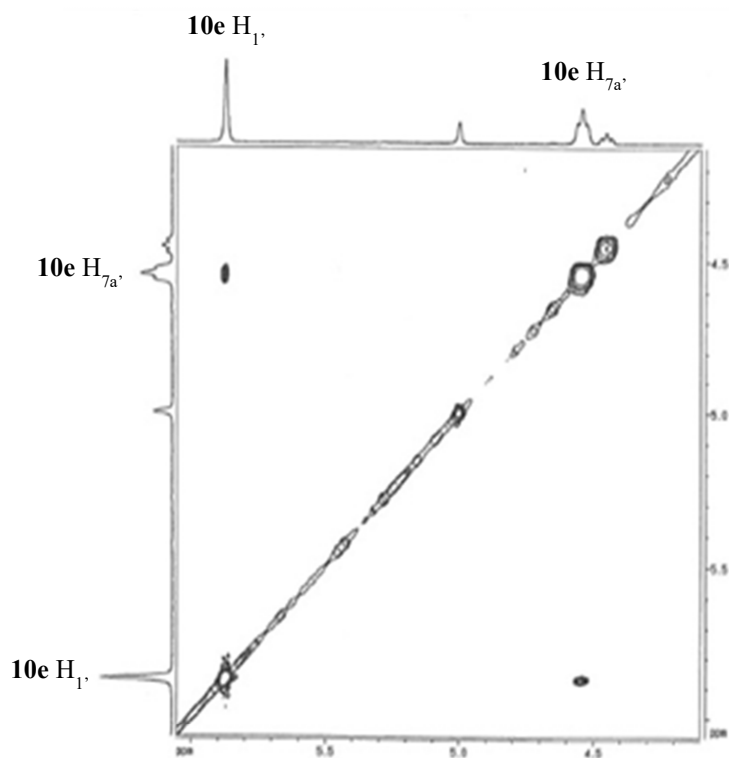

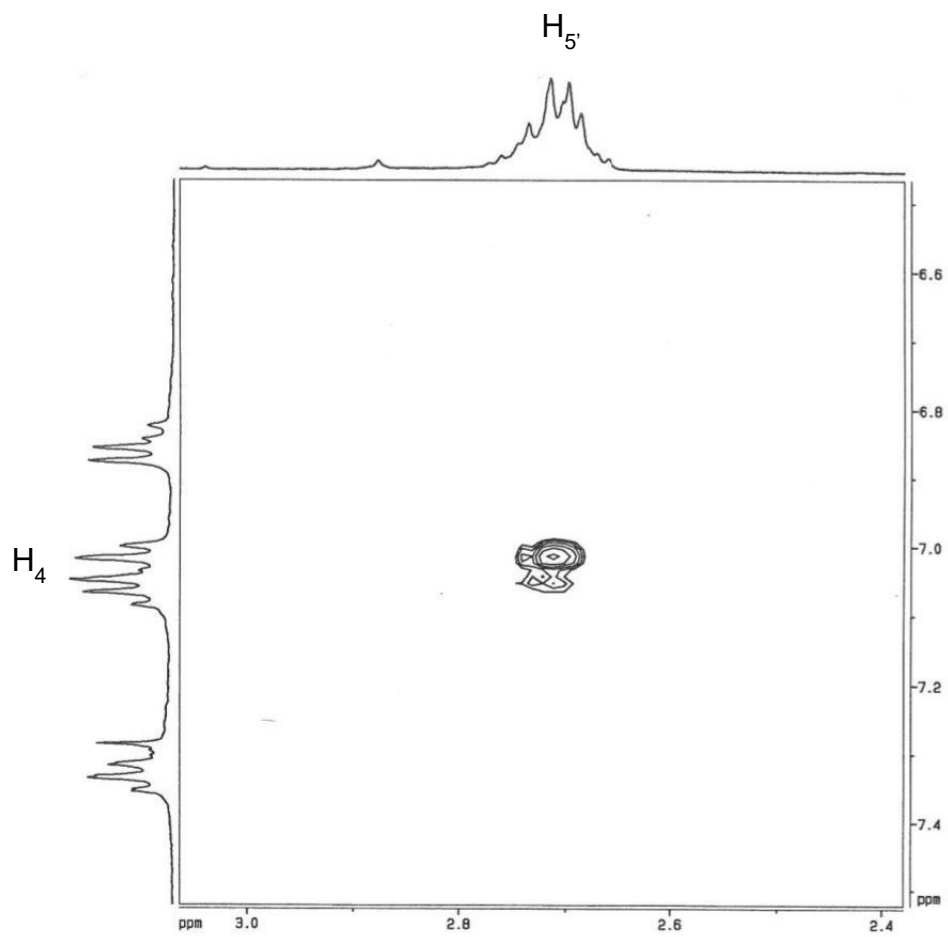

**Figure 62.**  $^1\text{H-NMR}$  Spectrum of compound **10e** and **11e** from **1g** ( $\text{CDCl}_3$ , 400 MHz)

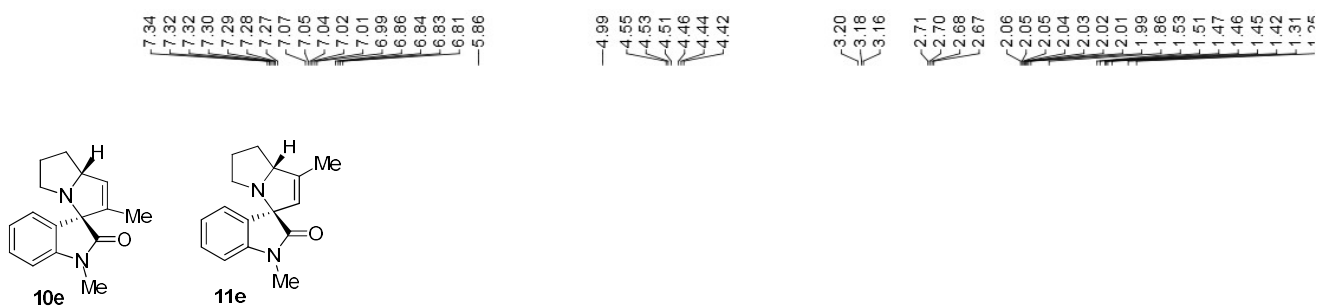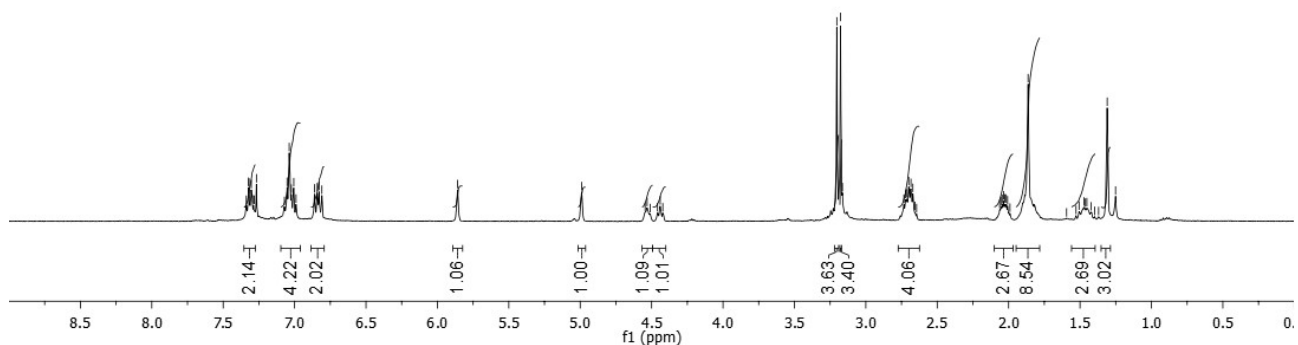

**Figure 63.**  $^{13}\text{C-NMR}$  Spectrum of compound **10e** and **11e** from **1g** ( $\text{CDCl}_3$ , 100 MHz)

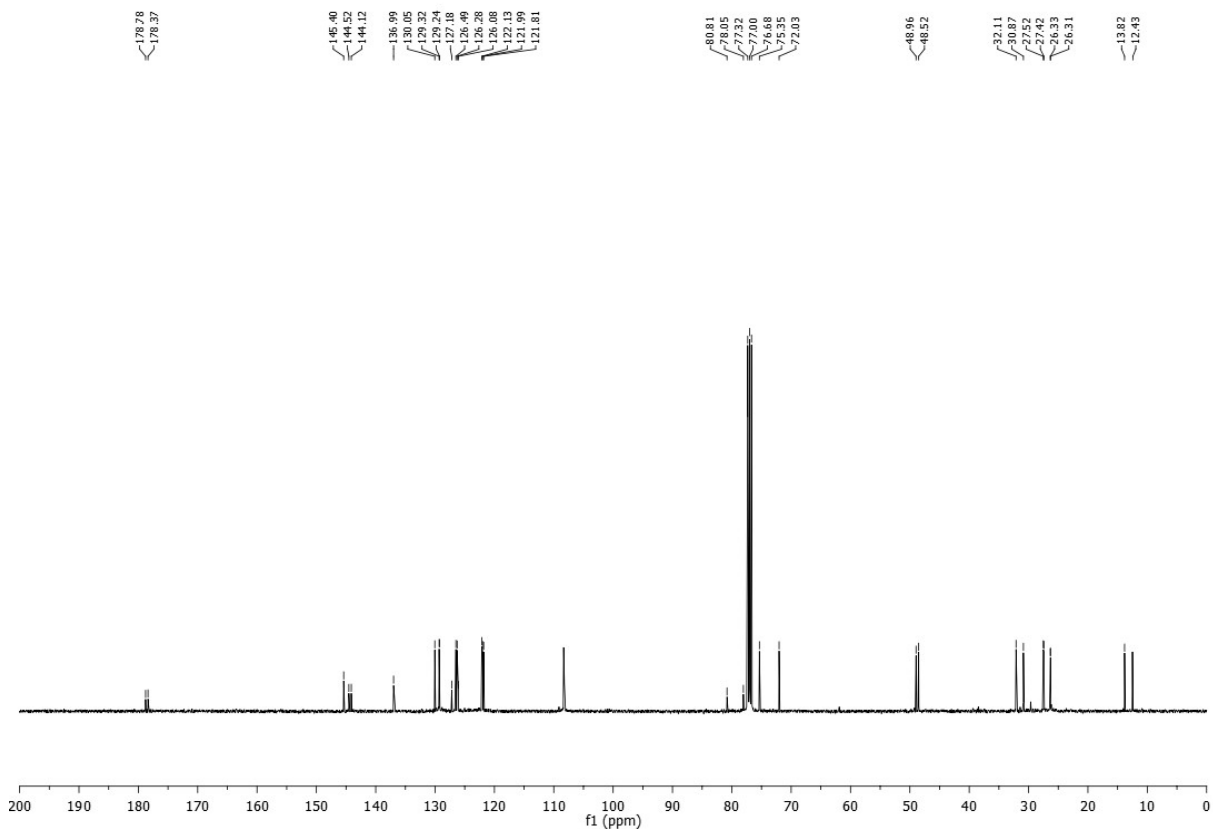

Supplement: d0ob02321c1.pdf [file d0ob02321c1.pdf]
